# Supplementary material for: Co-occurrence networks reveal more complexity than community composition in resistance and resilience of microbial communities
Source: PubMed Central journal article supplement (PMC9256619; doi:10.1038/s41467-022-31343-y), 2022-07-05
Supplement: 41467_2022_31343_MOESM1_ESM.pdf [file 41467_2022_31343_MOESM1_ESM.pdf]

**Supplementary Information for “Co-occurrence Networks Reveal More Complexity Than  
Community Composition in Resistance and Resilience of Microbial Communities” by Gao et  
al.**

| Sample pair   | Drought period (weeks 3 - 8)                 | Rewetting period (weeks 9 -17)                   | Bacteria                                                                            | Fungi                                                                               |
|---------------|----------------------------------------------|--------------------------------------------------|-------------------------------------------------------------------------------------|-------------------------------------------------------------------------------------|
| Within group  | Control-Control pair or Drought-Drought pair | Control-Control pair or Rewetting-Rewetting pair |  |  |
| Between group | Control-Drought pair                         | Control-Rewetting pair                           |  |  |

\* Fungi > Bacteria (P < 0.05); \* Bacteria > Fungi (P < 0.05); ns: not significant (P > 0.05); nd: not done

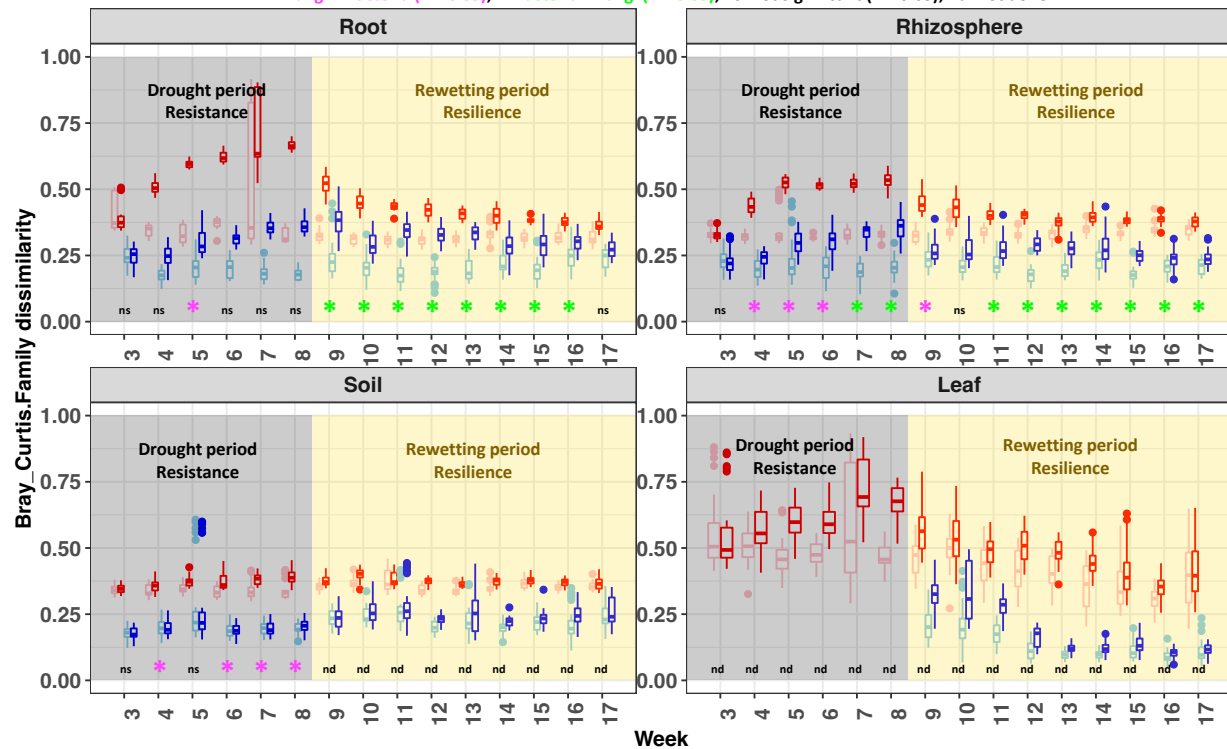

**Supplementary Fig. 1.** Resistance and resilience of bacterial OTUs composition and fungal family composition. Note the results at fungal OTU levels can be found in Fig. 1. Bray-Curtis dissimilarities were computed for bacterial and fungal communities of four compartments (root, rhizosphere, soil, leaf) of n=12 biologically independent plots examined over 17 weeks. The boxes represent the 25th–75th percentiles (with the median as a horizontal line) and the whiskers show the 10th–90th percentiles. Ecological resistance to drought stress is detected by comparing compositional dissimilarity of between-group pairs (control-drought pairs) against within-group pairs (control-control pairs and drought-drought pairs) at each of the droughted weeks (weeks 3 - 8, the grey shaded area) (\*p < 0.05, adjusted by Bonferroni method; unpaired t-test, two-sided). Ecological resilience to rewetting is detected by assessing, from before to after rewetting, the change in the difference of compositional dissimilarity between within-group pairs and between-

group pairs. Here, the point just before rewetting was week 8 and the points after rewetting were weeks 9 – 17 (the gold shaded area). In most cases, the results of fungal families and OTUs are largely consistent. Different family and OTUs results were detected in four points where significances detected by OTUs were not detected by family (root, week 4 and 17), or significances detected by family were not detected by OTUs (rhizosphere, weeks 7 and 8). We report only results that are robust across these two conditions.

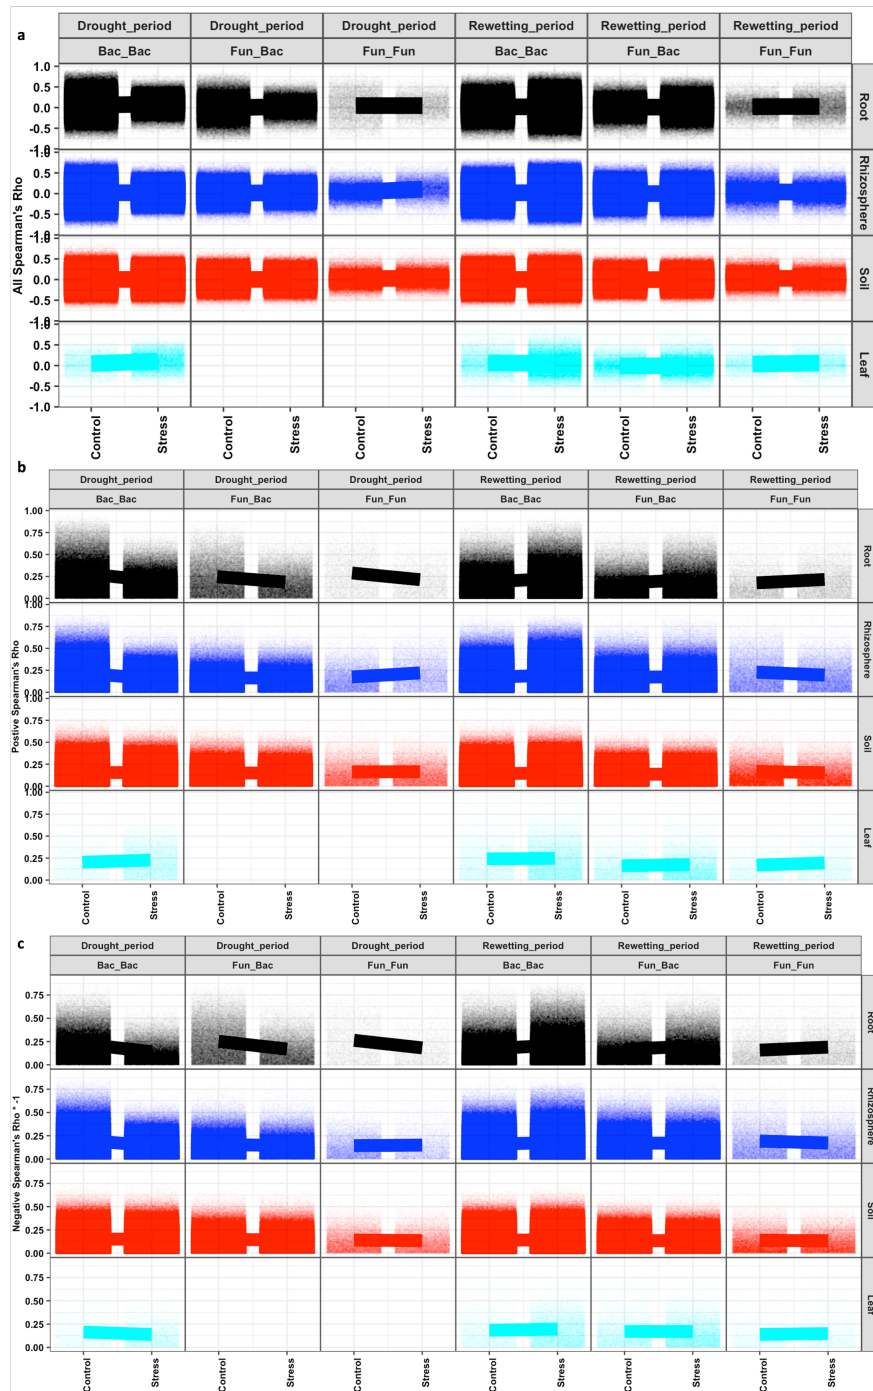

**Supplementary Fig. 2** Pairwise Bacterial-Bacterial (Bac-Bac), Fungal-Bacterial (Fun\_Bac), and Fungal-Fungal (Fun\_Fun) correlations in drought period and rewetting period in root, rhizosphere, soil and leaf. This figure illustrates the data points underlying the lines of each compartment and each correlation type shown in Fig. 2.



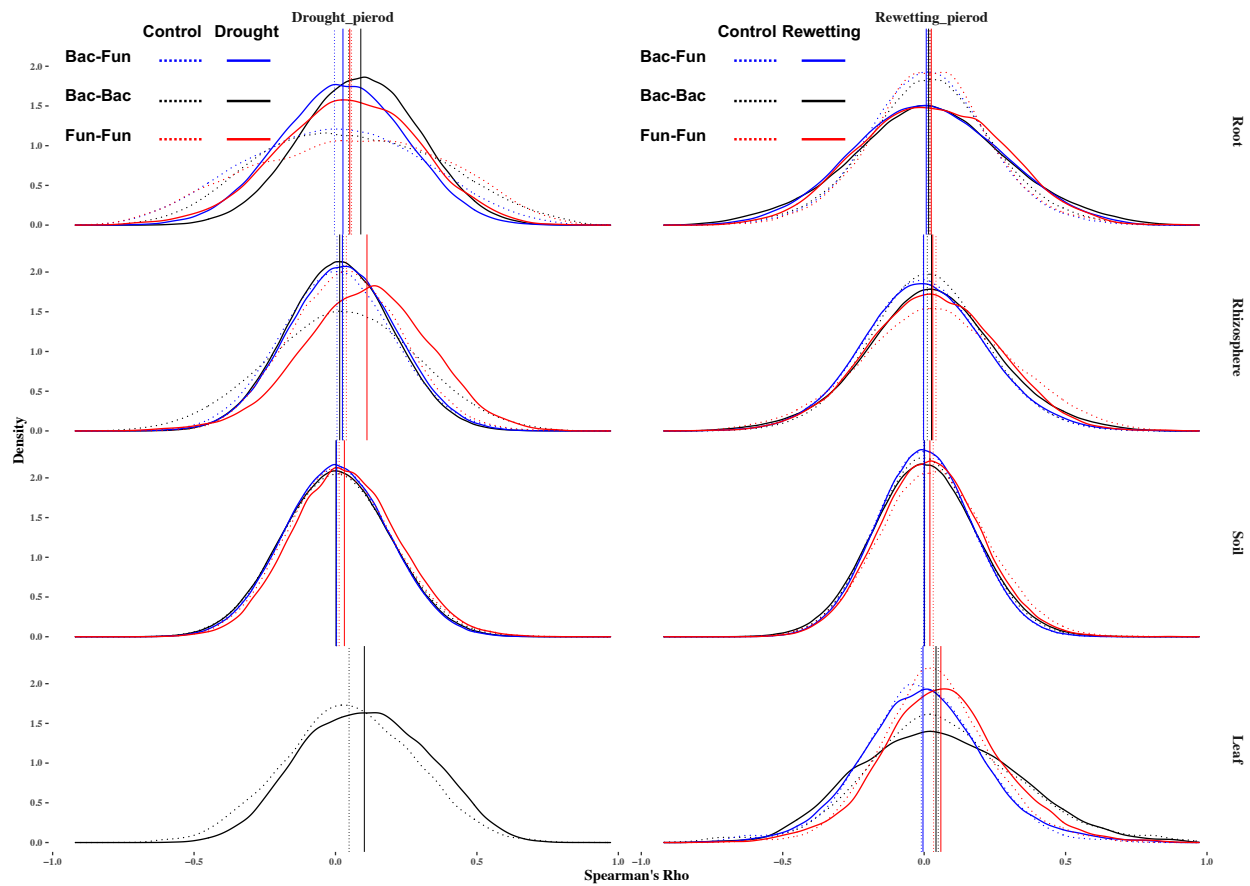

**Supplementary Fig. 3** Frequency distributions of all correlations between microbial taxa as assessed by Spearman's Rho. In general, drought decreased and rewetting increased the strength of correlations. However, obvious exceptions are seen for the effect of drought on fungus-fungus correlations in rhizosphere and bacterium-bacterium correlations in leaf.

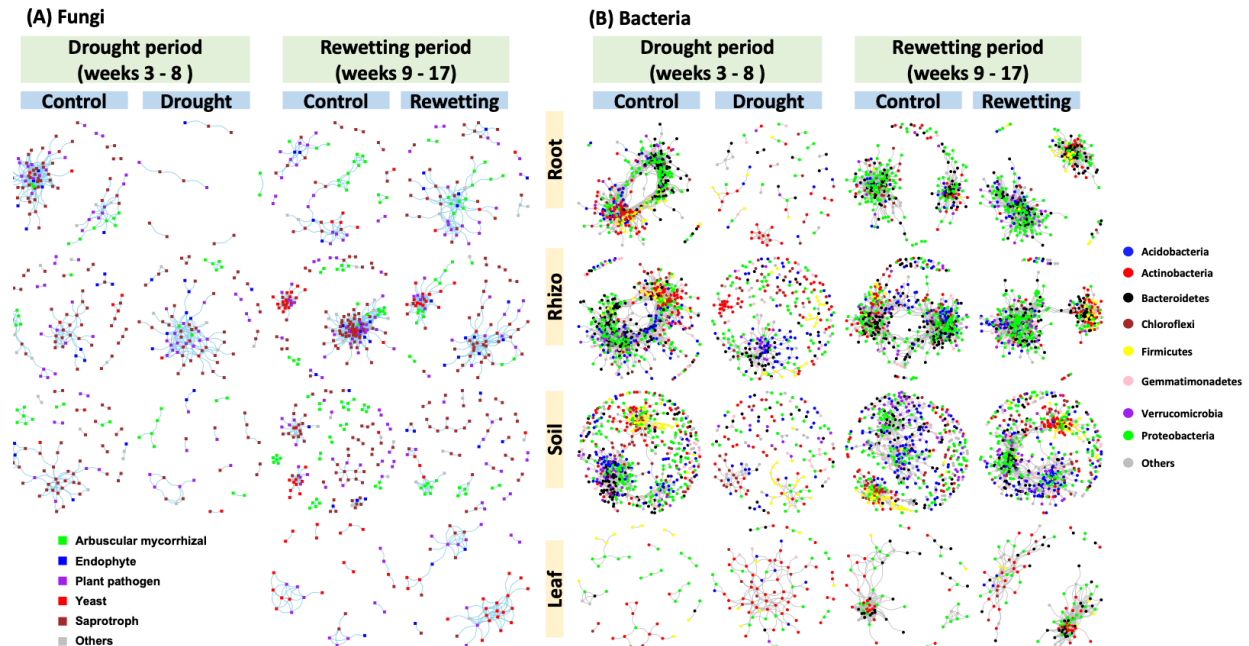

**Supplementary Fig. 4** Subnetworks of significant positive Spearman correlations (A) between fungal taxa and (B) between bacterial taxa. (A) Subnetworks of significant positive correlations between fungal OTUs. The FF co-occurrence in the rhizosphere is enhanced by drought, although it is disrupted in root. Re-watering caused recovery of the FF network, with overcompensation in root and a lag in rhizosphere and soil. (B) Subnetworks of significant correlations between bacterial OTUs. The BB co-occurrence in leaf is enhanced by drought, although it is disrupted in root, rhizosphere and soil. Re-watering caused recovery of the BB network.

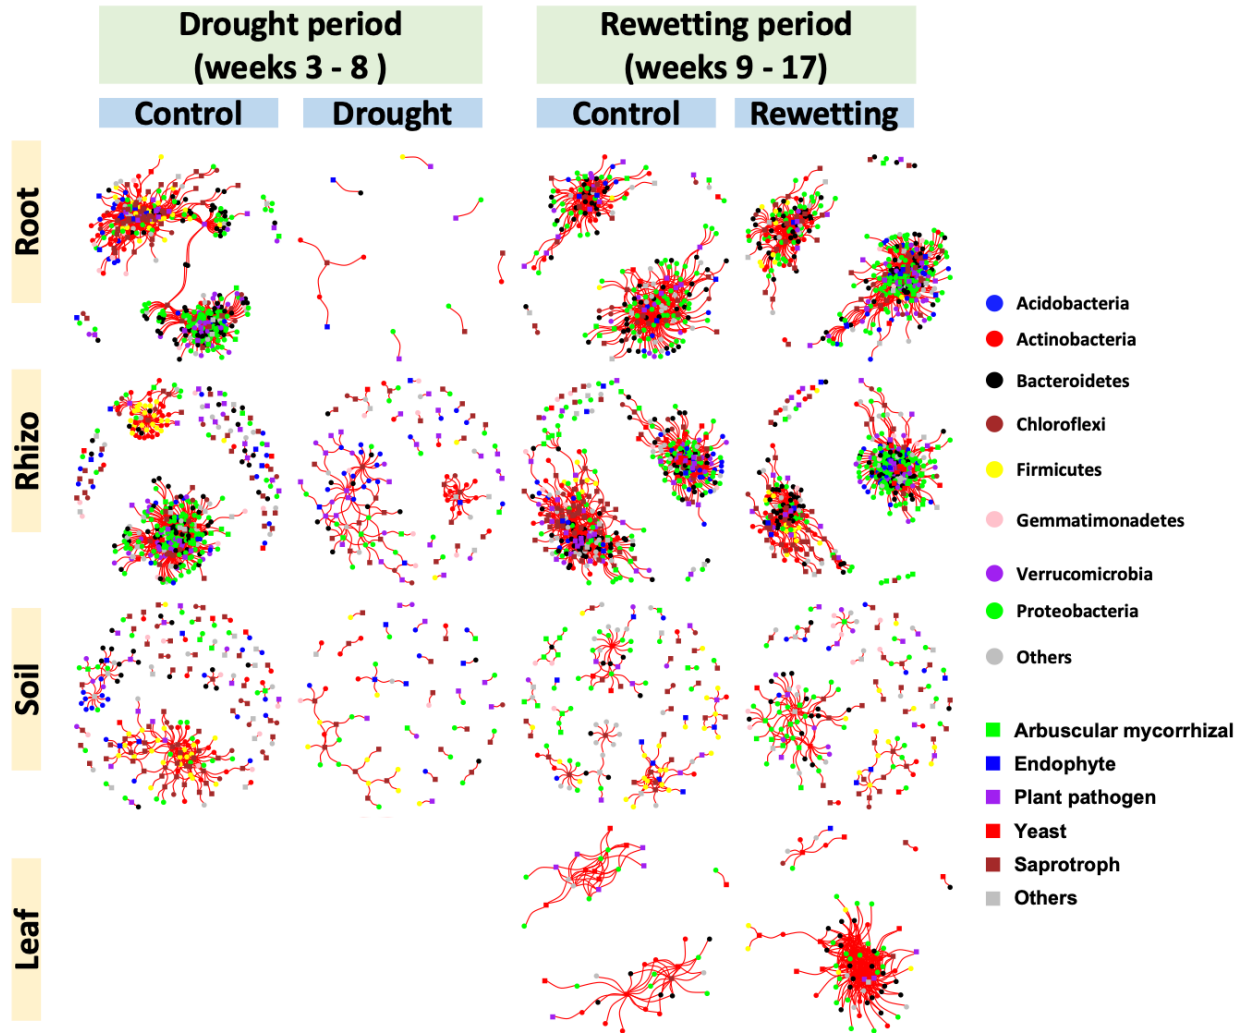

**Supplementary Fig. 5** Subnetworks of significant correlations between bacterial and fungal OTUs. The BF co-occurrence in root, rhizosphere and soil are drastically disrupted by pre-flowering drought. Rewetting caused recovery of BB network, with overcompensation in root and leaf.

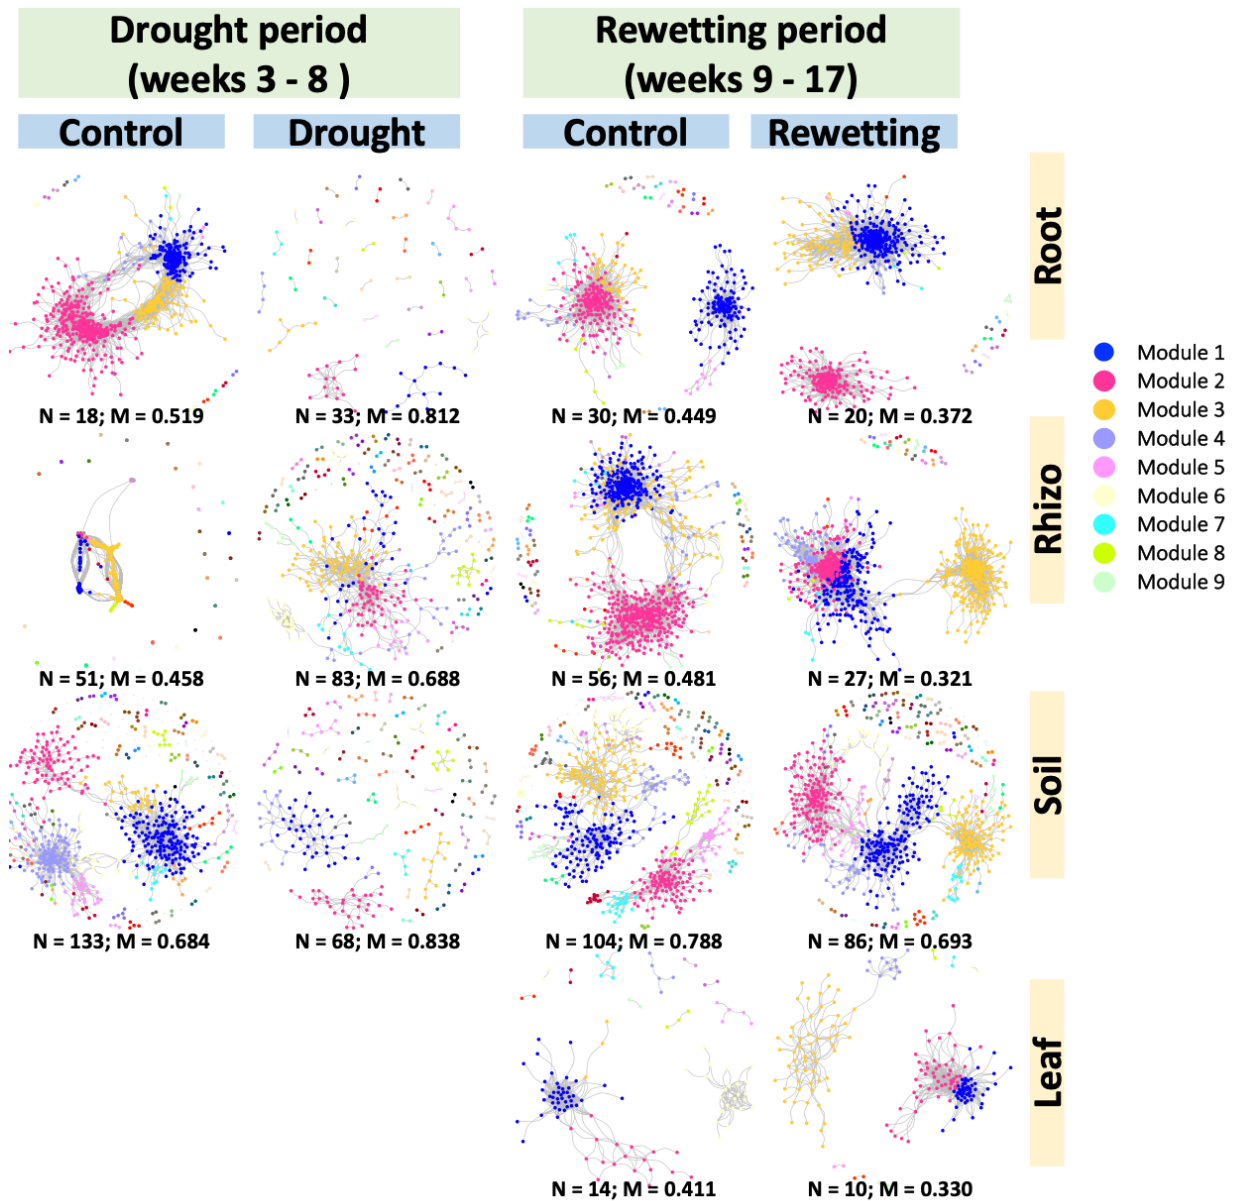

**Supplementary Fig. 6** Modularity of networks of significant positive cross-taxonomic group correlations (bacteria and fungi). Network modules are detected by the cluster\_fast\_greedy method and demonstrated by different colors. N: the number of modules detected. M: modularity. In general, drought increased, and rewetting decreased the modularity of cross-domain co-occurrence networks; except for the modularity BB network in leaf that was decrease by pre-flowering drought.

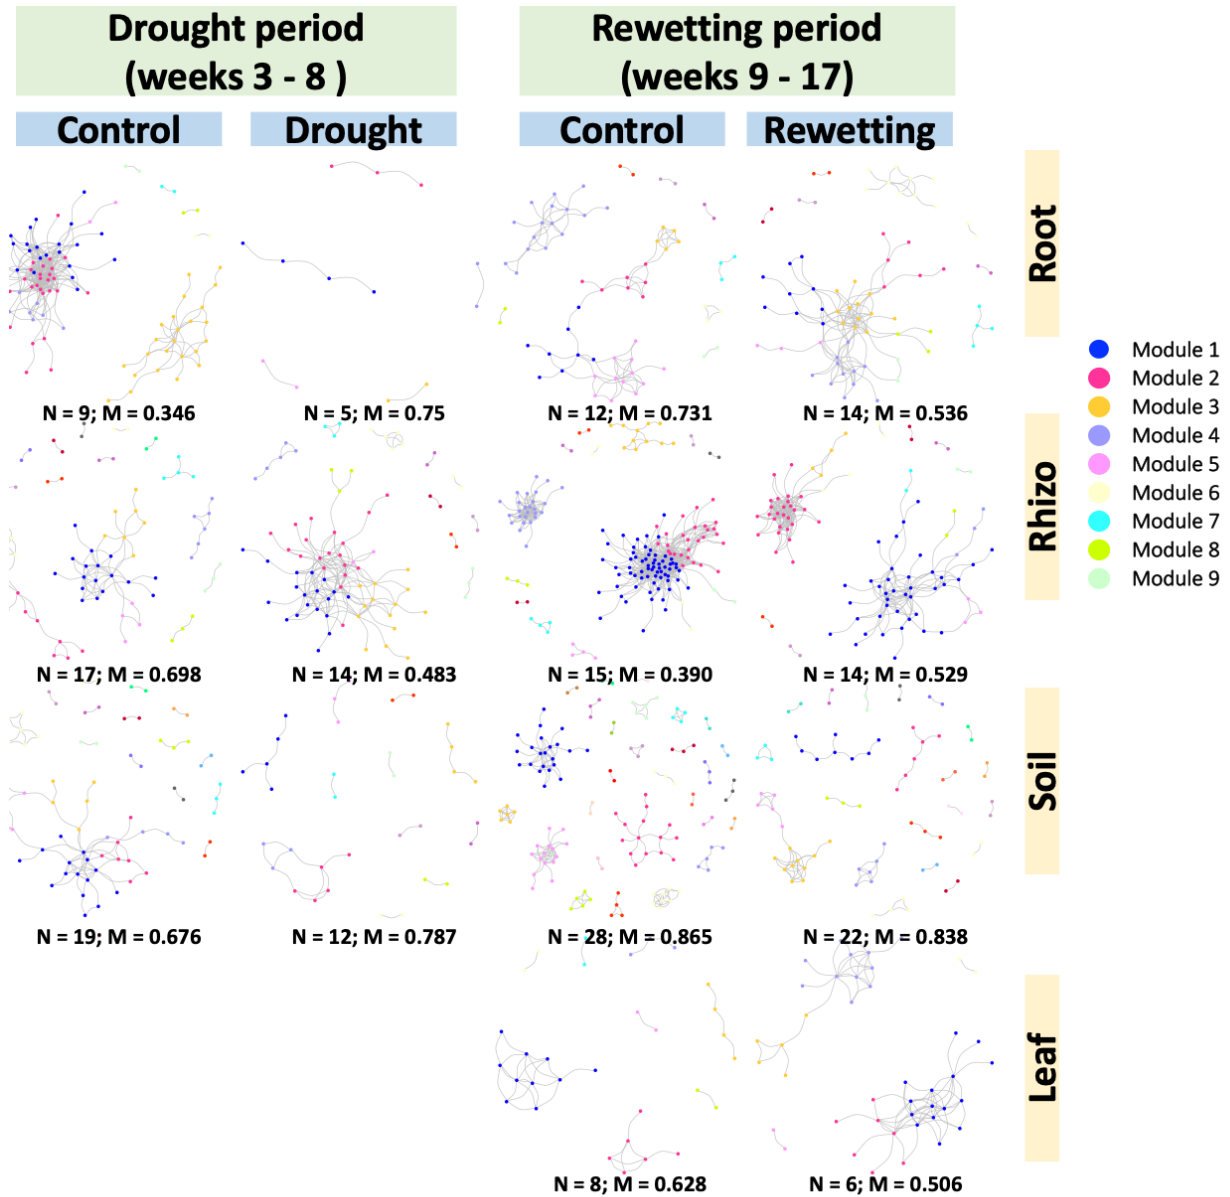

**Supplementary Fig. 7** Modularity of networks of significant positive fungal-fungal correlations. Network modules are detected by the cluster\_fast\_greedy method and demonstrated by different colors. N: the number of modules detected. M: modularity.

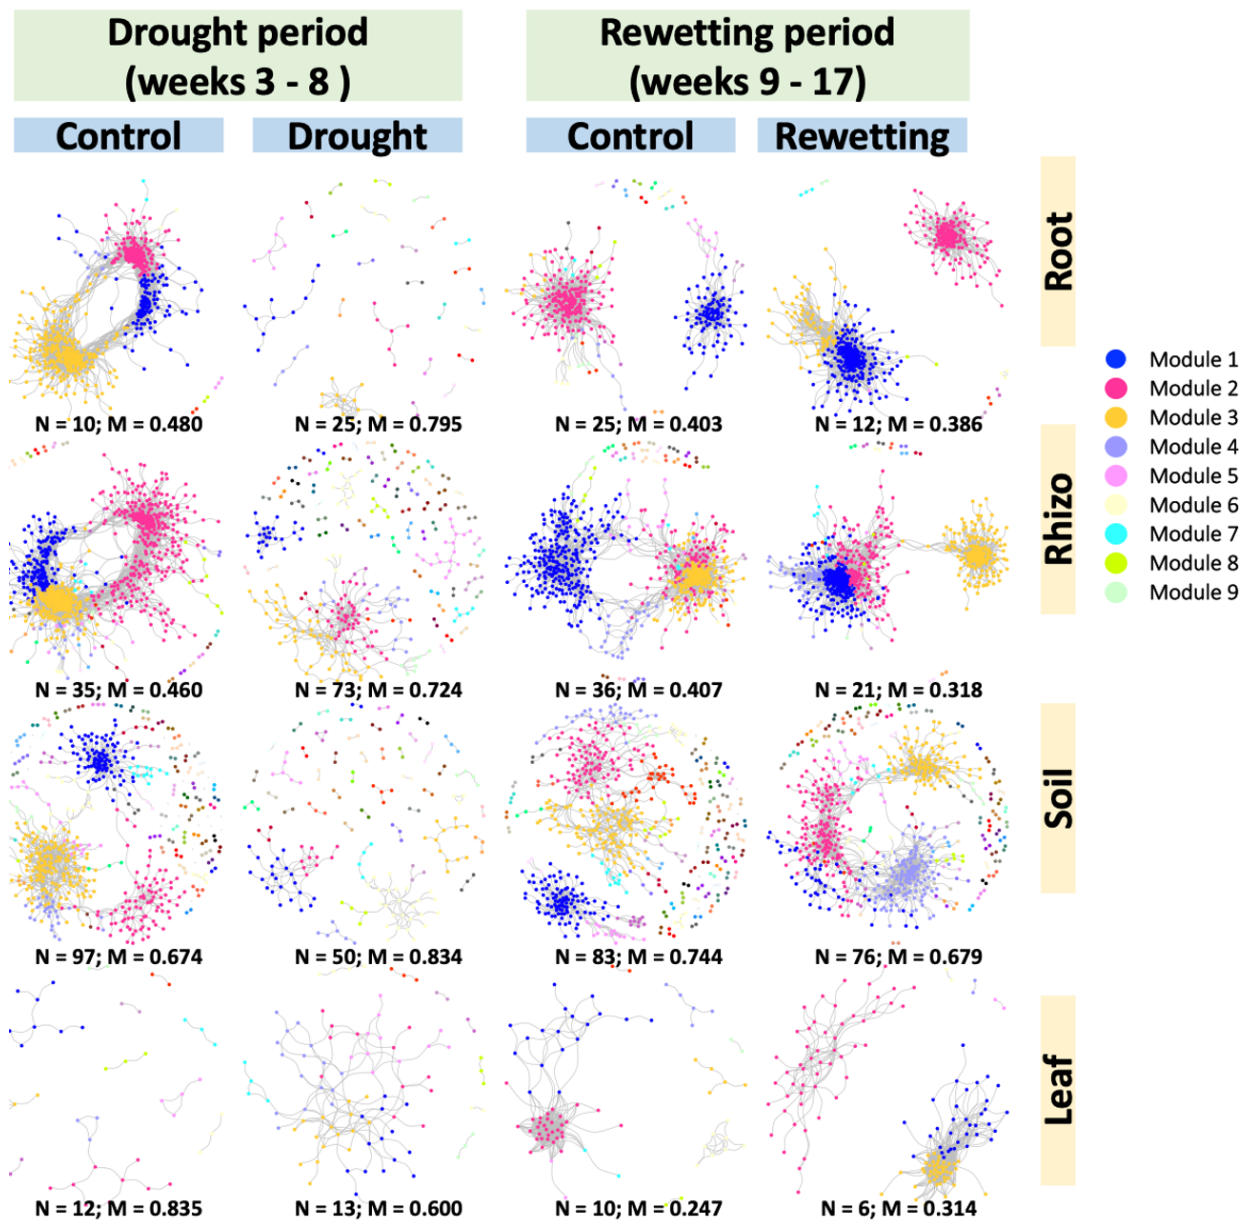

**Supplementary Fig. 8** Modularity of networks of significant positive bacterial-bacterial correlations.

Network modules are detected by the cluster\_fast\_greedy method and demonstrated by different colors.

N: the number of modules detected. M: modularity.

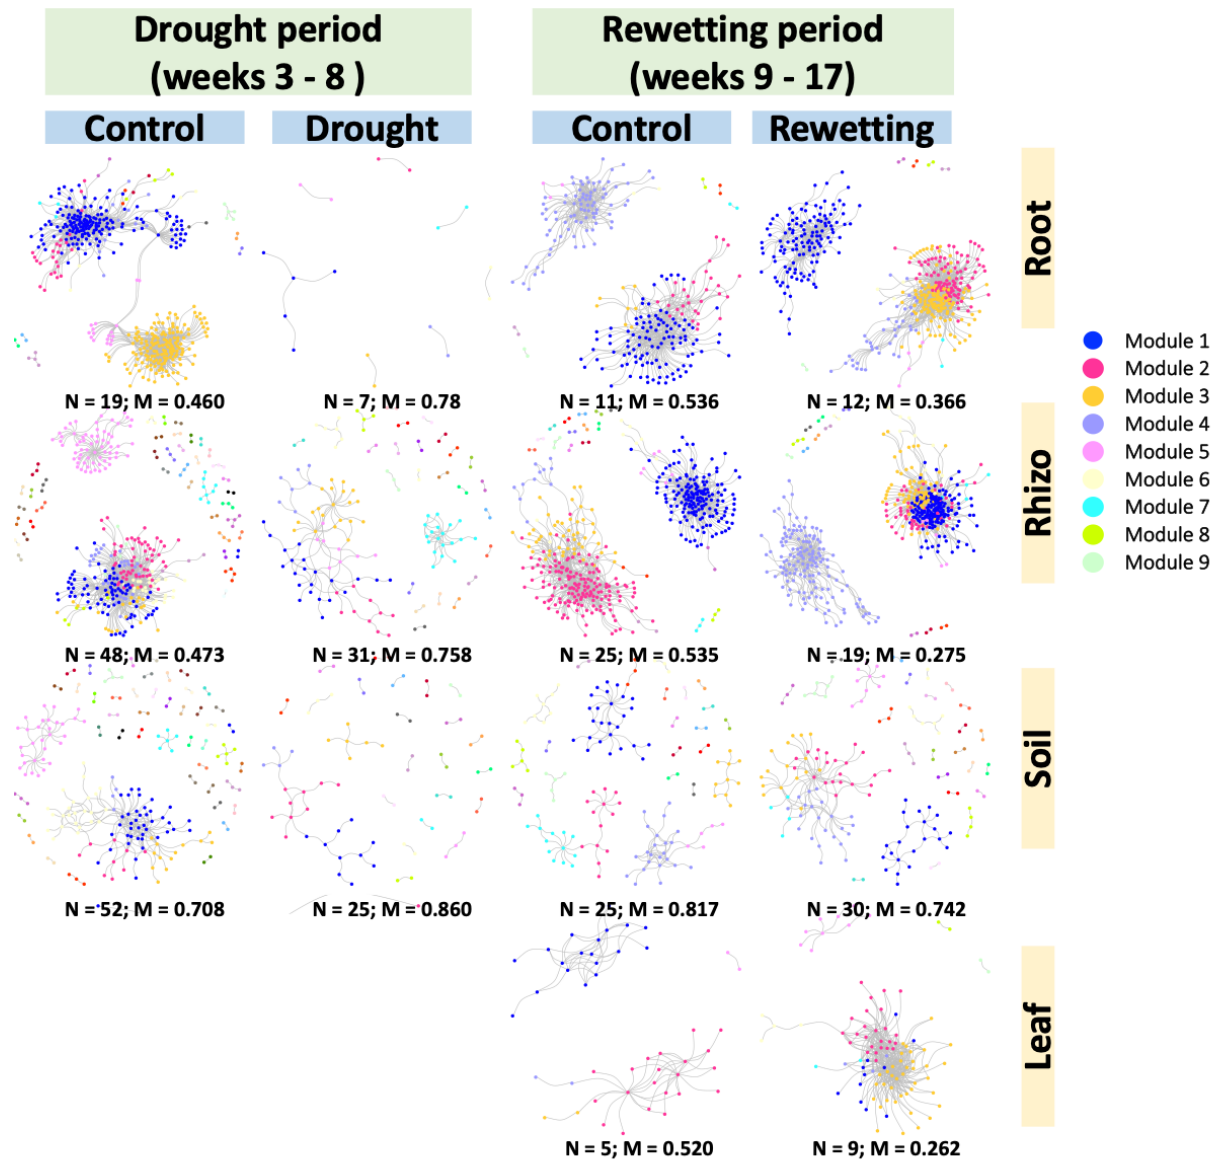

**Supplementary Fig. 9** Modularity of networks of significant positive fungal-bacterial correlations. Network modules are detected by the cluster\_fast\_greedy method and demonstrated by different colors. N: the number of modules detected. M: modularity.



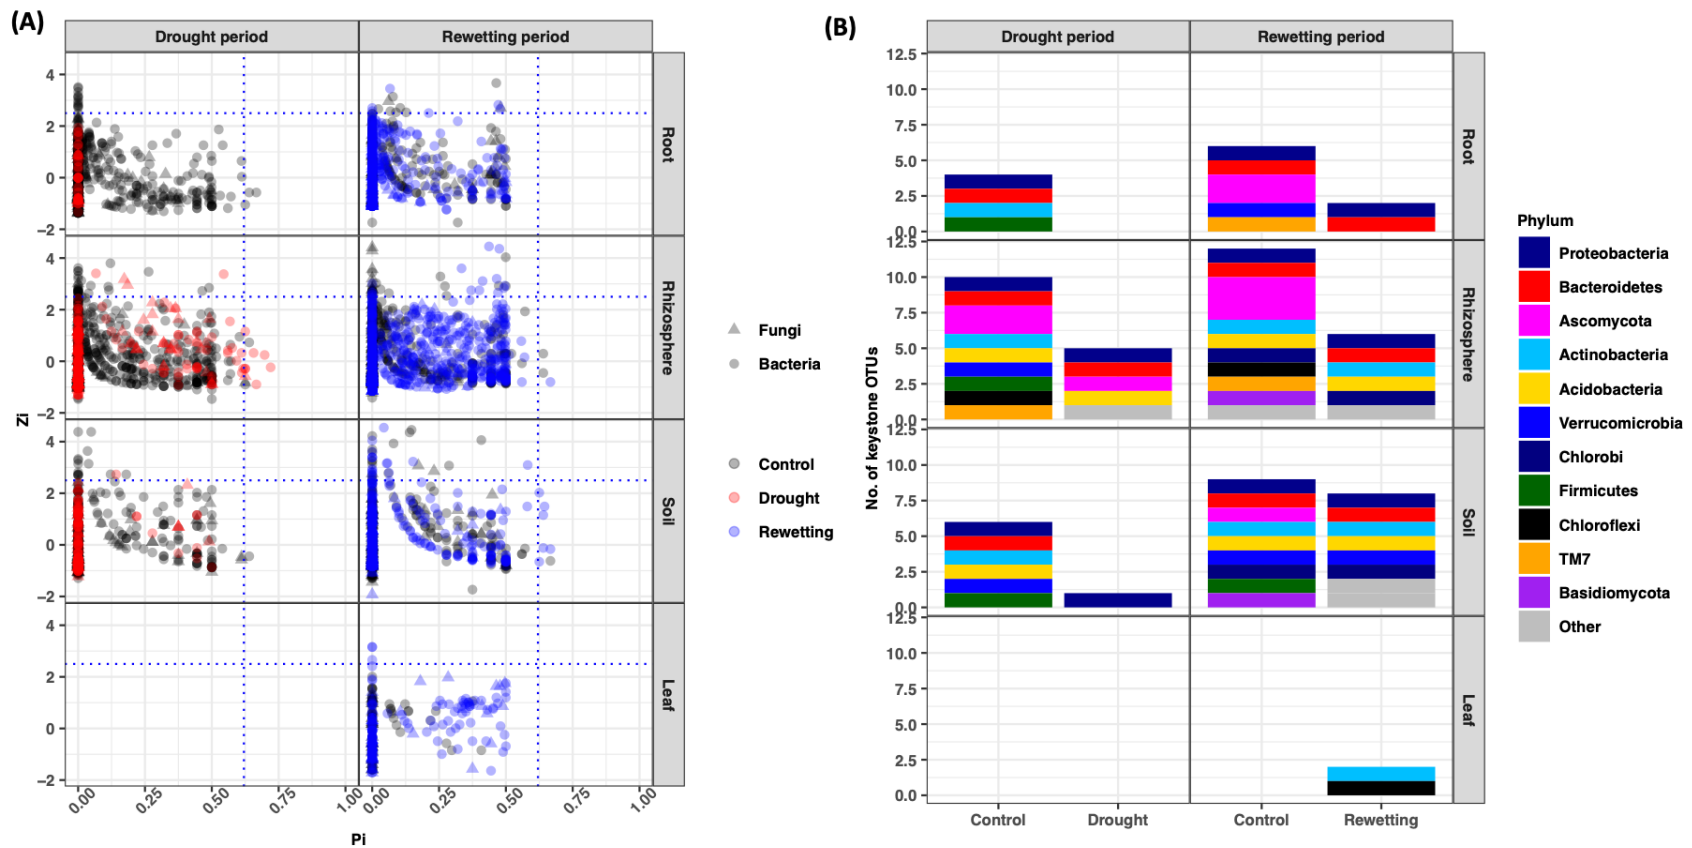

**Supplementary Fig. 10** Detection by connectivity of putative keystone taxa and their phyla. (A) Recognition of putative keystone taxa by connectivity within-modules ( $Z_i$ ) and among-modules ( $P_i$ ). Module hubs have  $Z_i > 2.5$ , connectors have  $P_i > 0.62$ , and network hubs have  $Z_i > 2.5$  and  $P_i > 0.62$ . (B) Phyla and abundance of putative keystone taxa.



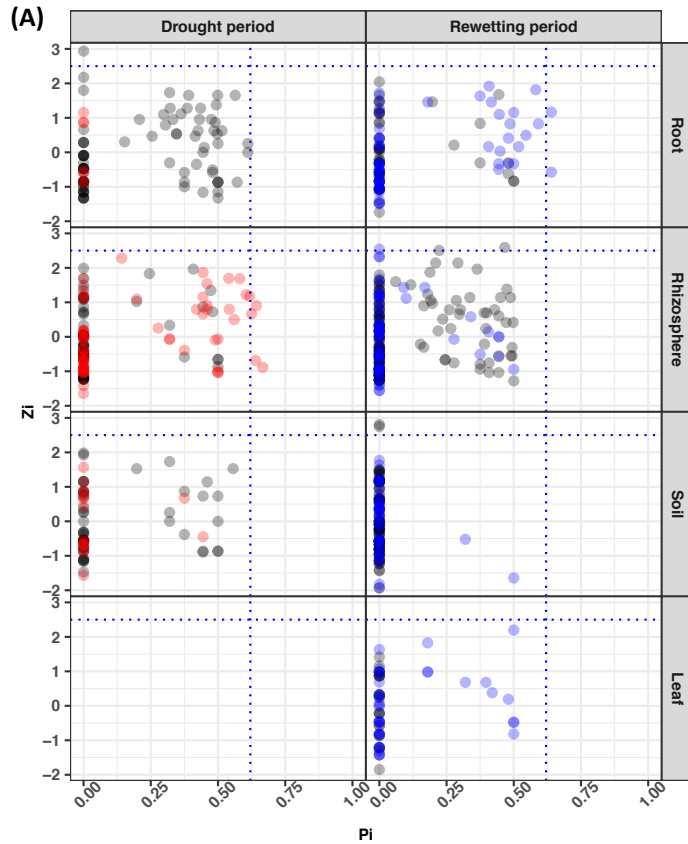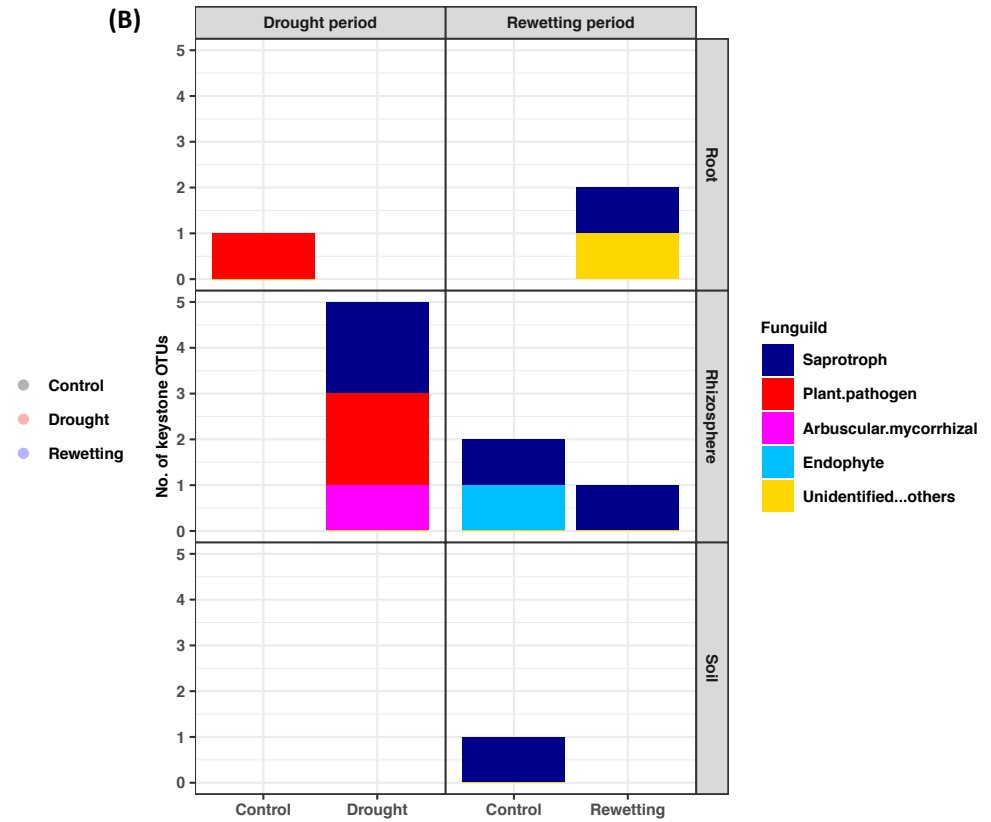

**Supplementary Fig. 11** Detection by connectivity of putative keystone taxa and their functional guilds of fungal-fungal network. (A) Recognition of putative keystone taxa by connectivity within-modules ( $Z_i$ ) and among-modules ( $P_i$ ). Module hubs have  $Z_i > 2.5$ , connectors have  $P_i > 0.62$ , and network hubs have  $Z_i > 2.5$  and  $P_i > 0.62$ . (B) Fungal functional guilds and number of putative keystone taxa.

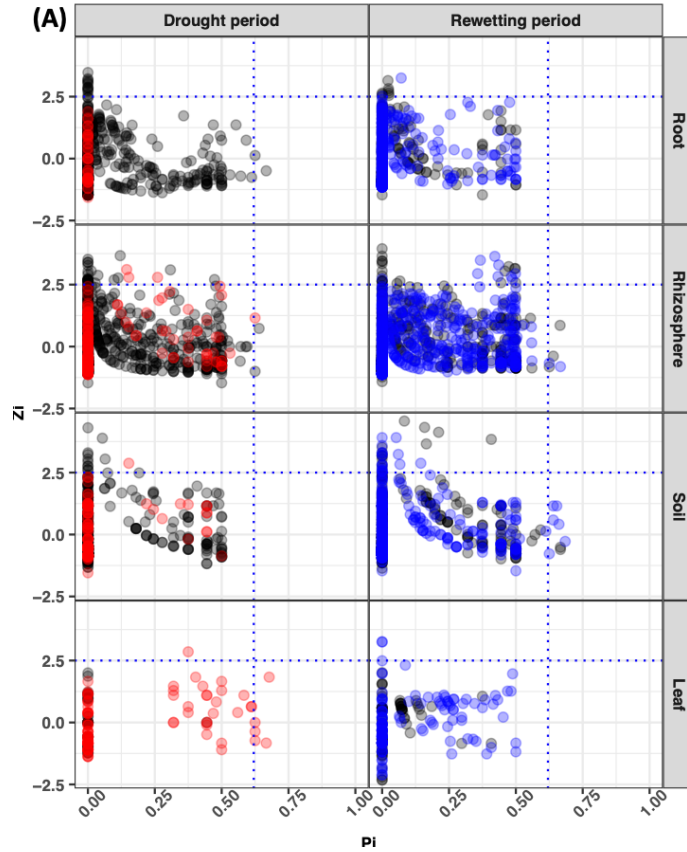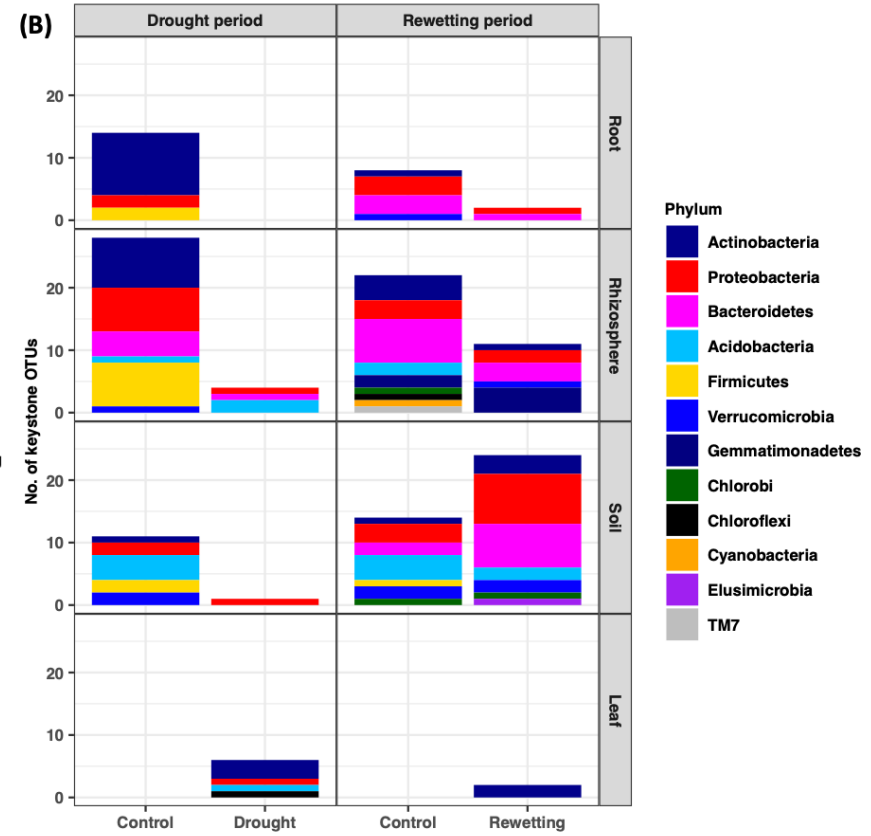

**Supplementary Fig. 12** Detection by connectivity of putative keystone taxa and their phylum of bacterial-bacterial network. (A) Recognition of putative keystone taxa by connectivity within-modules ( $Z_i$ ) and among-modules ( $P_i$ ). Module hubs have  $Z_i > 2.5$ , connectors have  $P_i > 0.62$ , and network hubs have  $Z_i > 2.5$  and  $P_i > 0.62$ . (B) Bacterial phylum and number of putative keystone taxa.

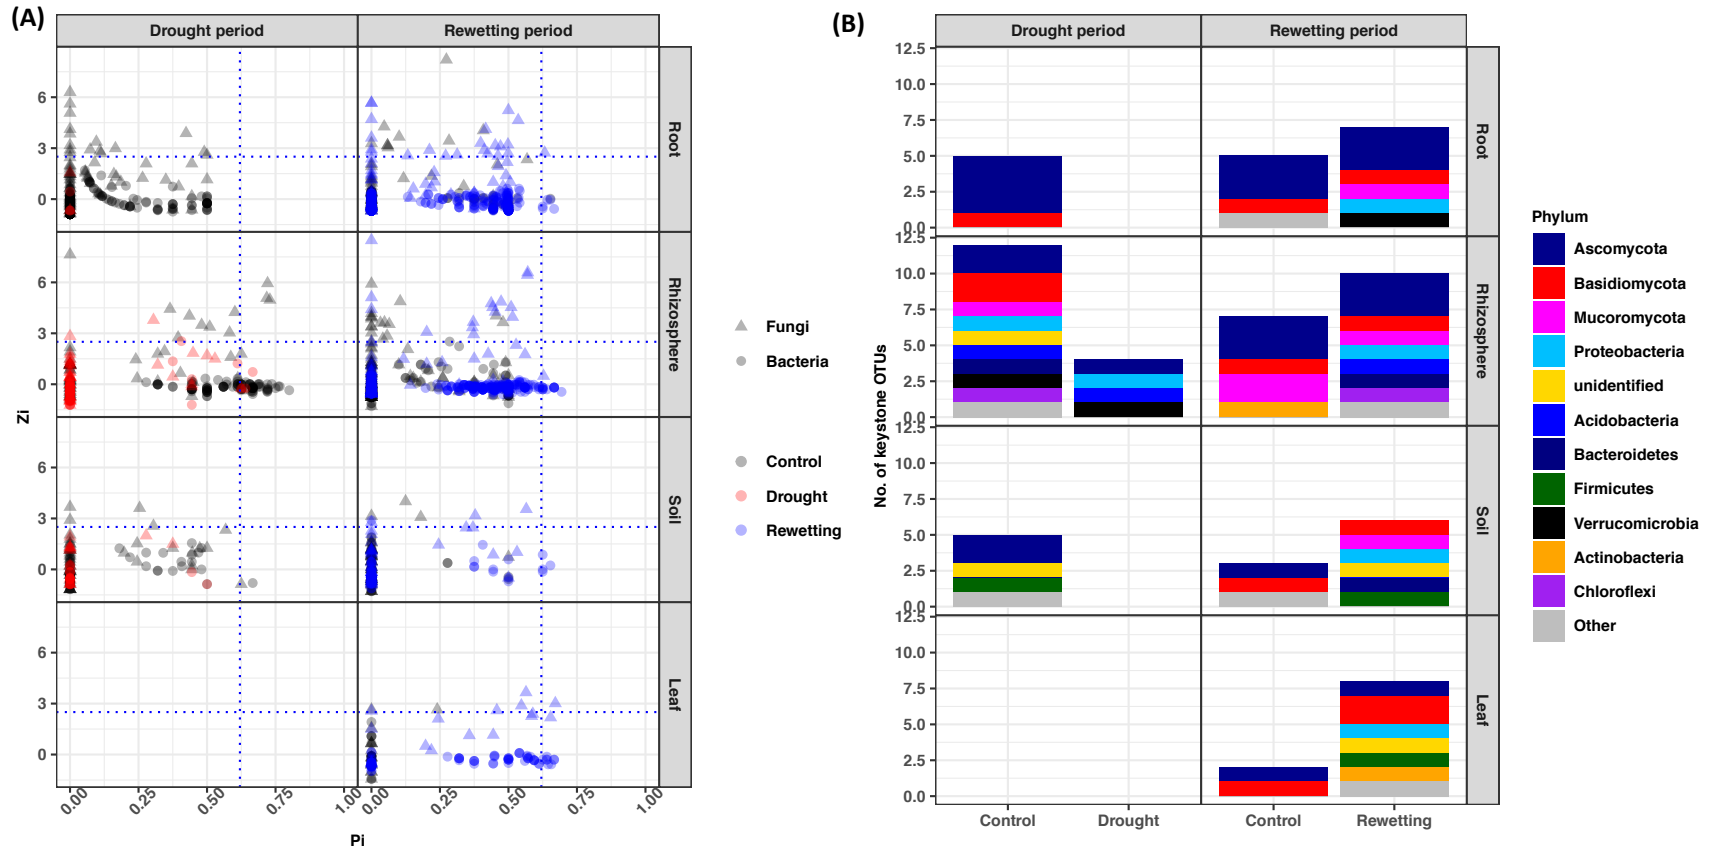

**Supplementary Fig. 13** Detection by connectivity of putative keystone taxa and their phylum of fungal-bacterial network. (A) Recognition of putative keystone taxa by connectivity within-modules ( $Z_i$ ) and among-modules ( $P_i$ ). Modules hubs have  $Z_i > 2.5$ , connectors have  $P_i > 0.62$ , and network hubs have  $Z_i > 2.5$  and  $P_i > 0.62$ . (B) Fungal and bacterial phylum and number of putative keystone taxa.

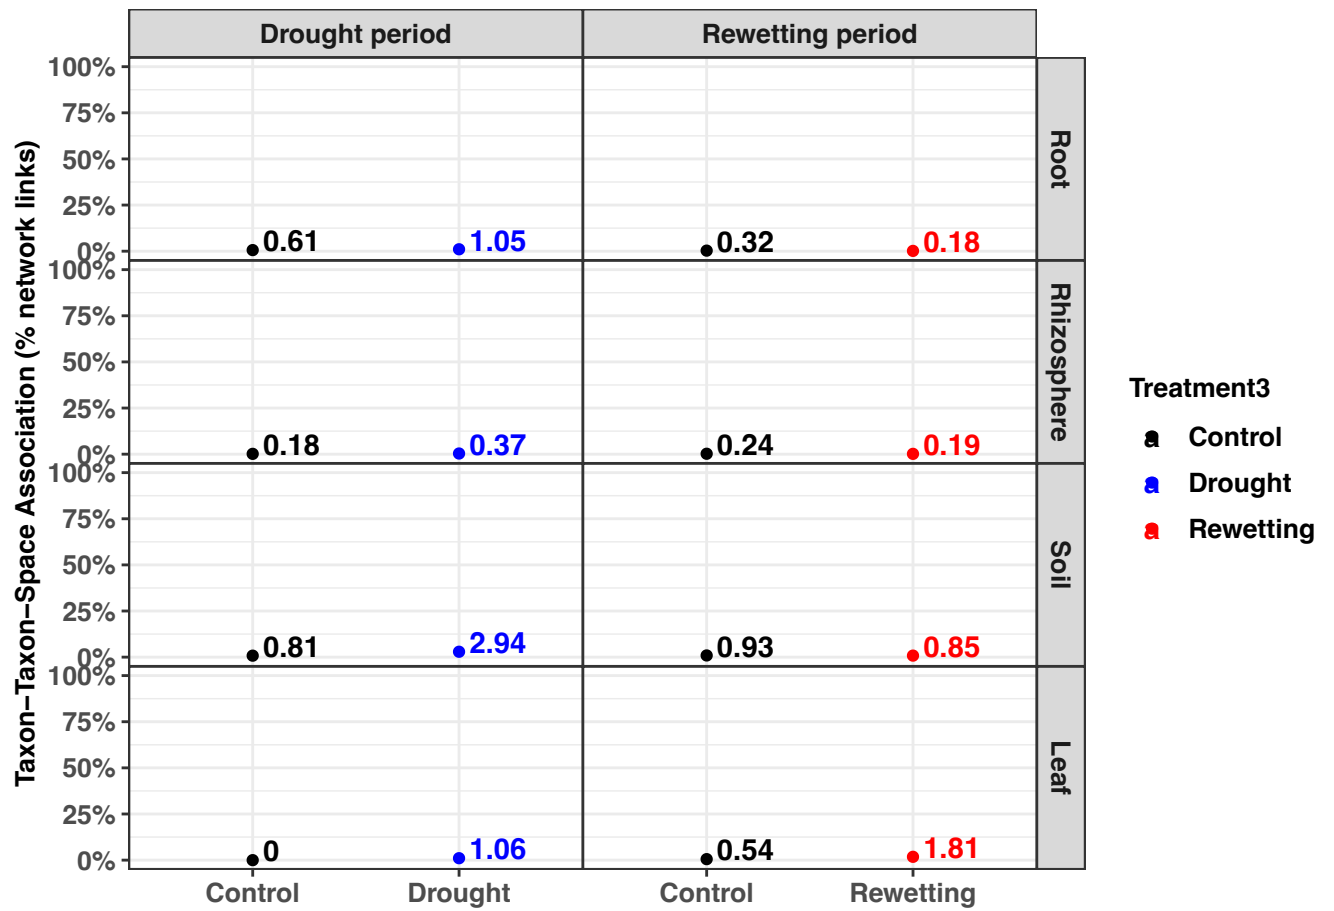

**Supplementary Fig. 14** Proportion of taxon-taxon associations related to dispersal limitation.

For each of taxon-taxon pair in the co-occurrence network, dispersal limitation was regarded as the driver if both taxa showed significant correlation with spatial distance.

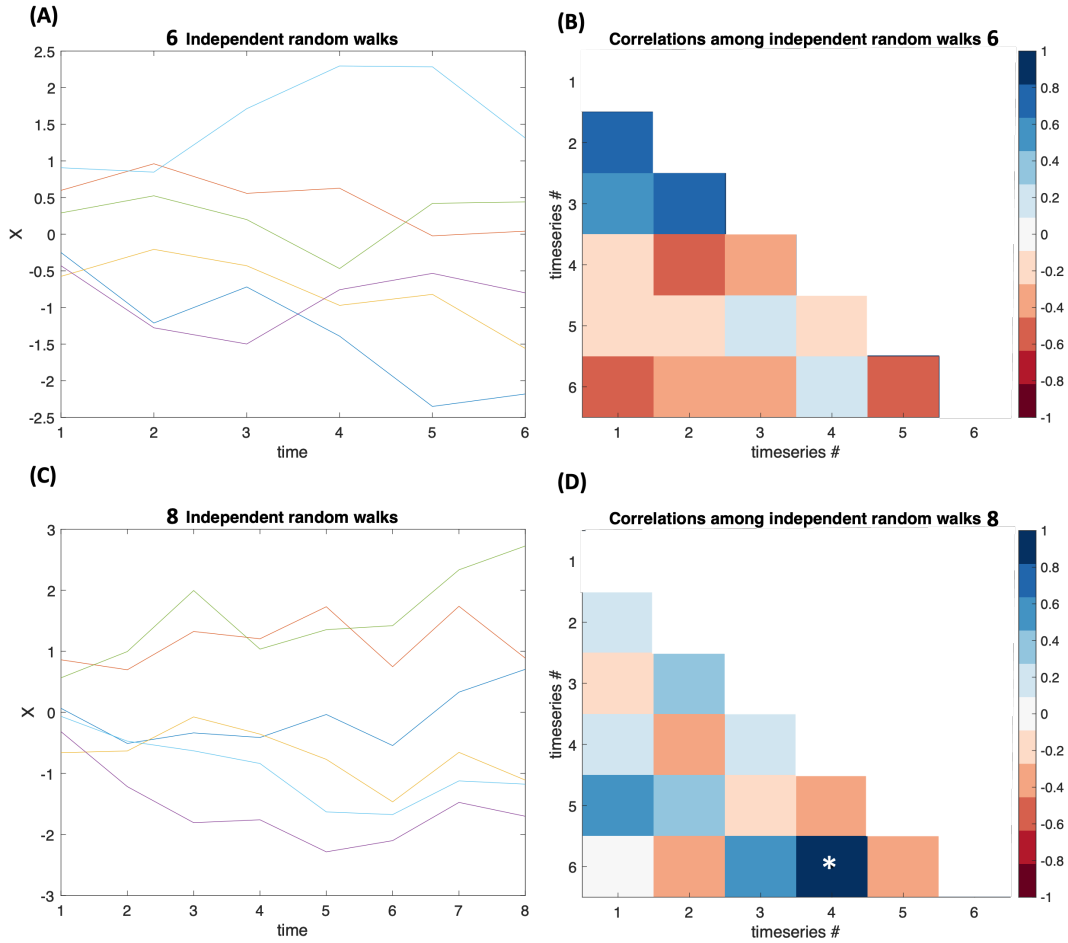

**Supplementary Fig. 15** Minimal spurious association was detected in using the approach of Coenen et al 2020<sup>1</sup> from 6 and 8 independent random walks over 6 temporal series. The analysis was repeated 10 times and results from one run are shown here. (A) Six time-series of six independent random walks mimicking the drought period. (B) For the 15 correlations among six time series of six independent random walks, at most 0-1 significant spurious associations were detected (none were found in this example). (C) Six time-series of eight independent random walks mimicking the rewetting period. (D) For the 15 correlations among six time series of eight independent random walks, at most 1-3 significant spurious associations were detected (The one in this run is marked with an asterisk in the example).

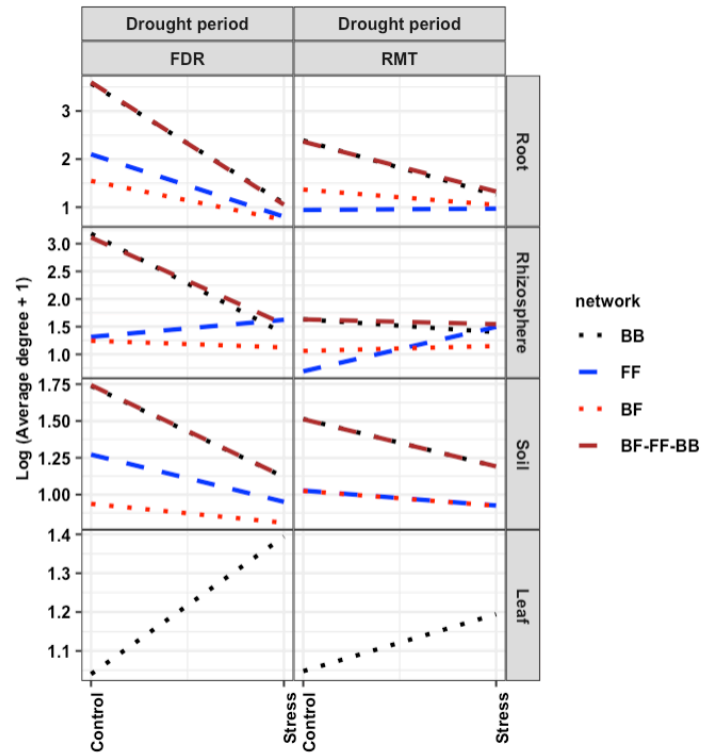

**Supplementary Fig. 16** Consistent responses to drought of average degree of association networks based on Spearman correlations as filtered by either the false discovery rate (FDR) or random matrix theory (RMT) approach. Note that in only one case, roots, is there disagreement where the FF network showed disruption using the FDR approach but was unchanged using the RMT approach.

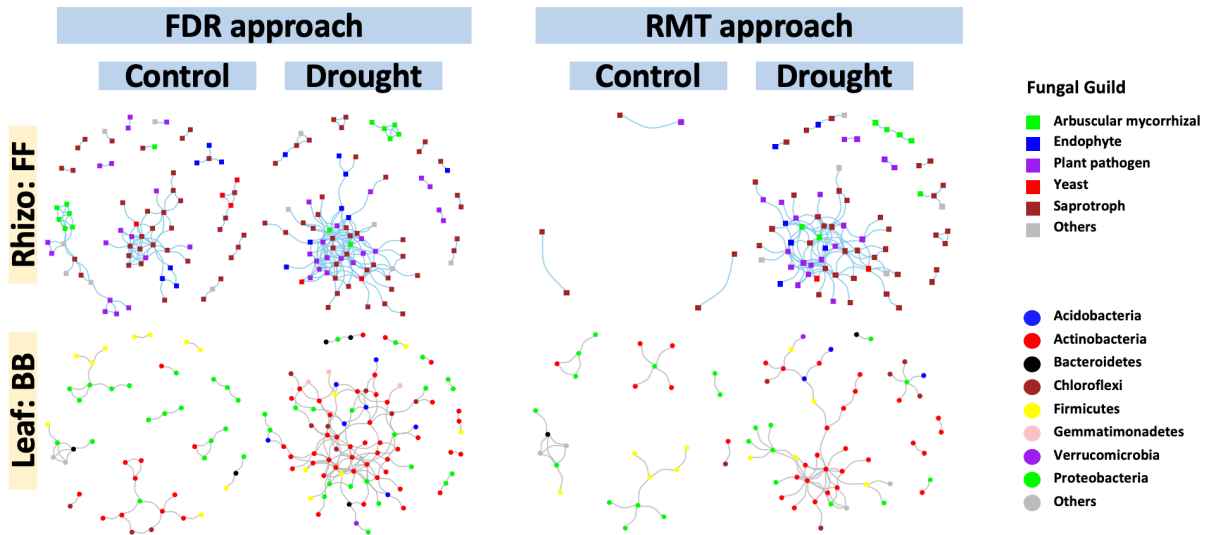

**Supplementary Fig. 17** Spearman Rho co-occurrence networks of rhizosphere fungi and leaf bacteria were dramatically strengthened by drought, whether measured by FDR- or RMT-based approach.

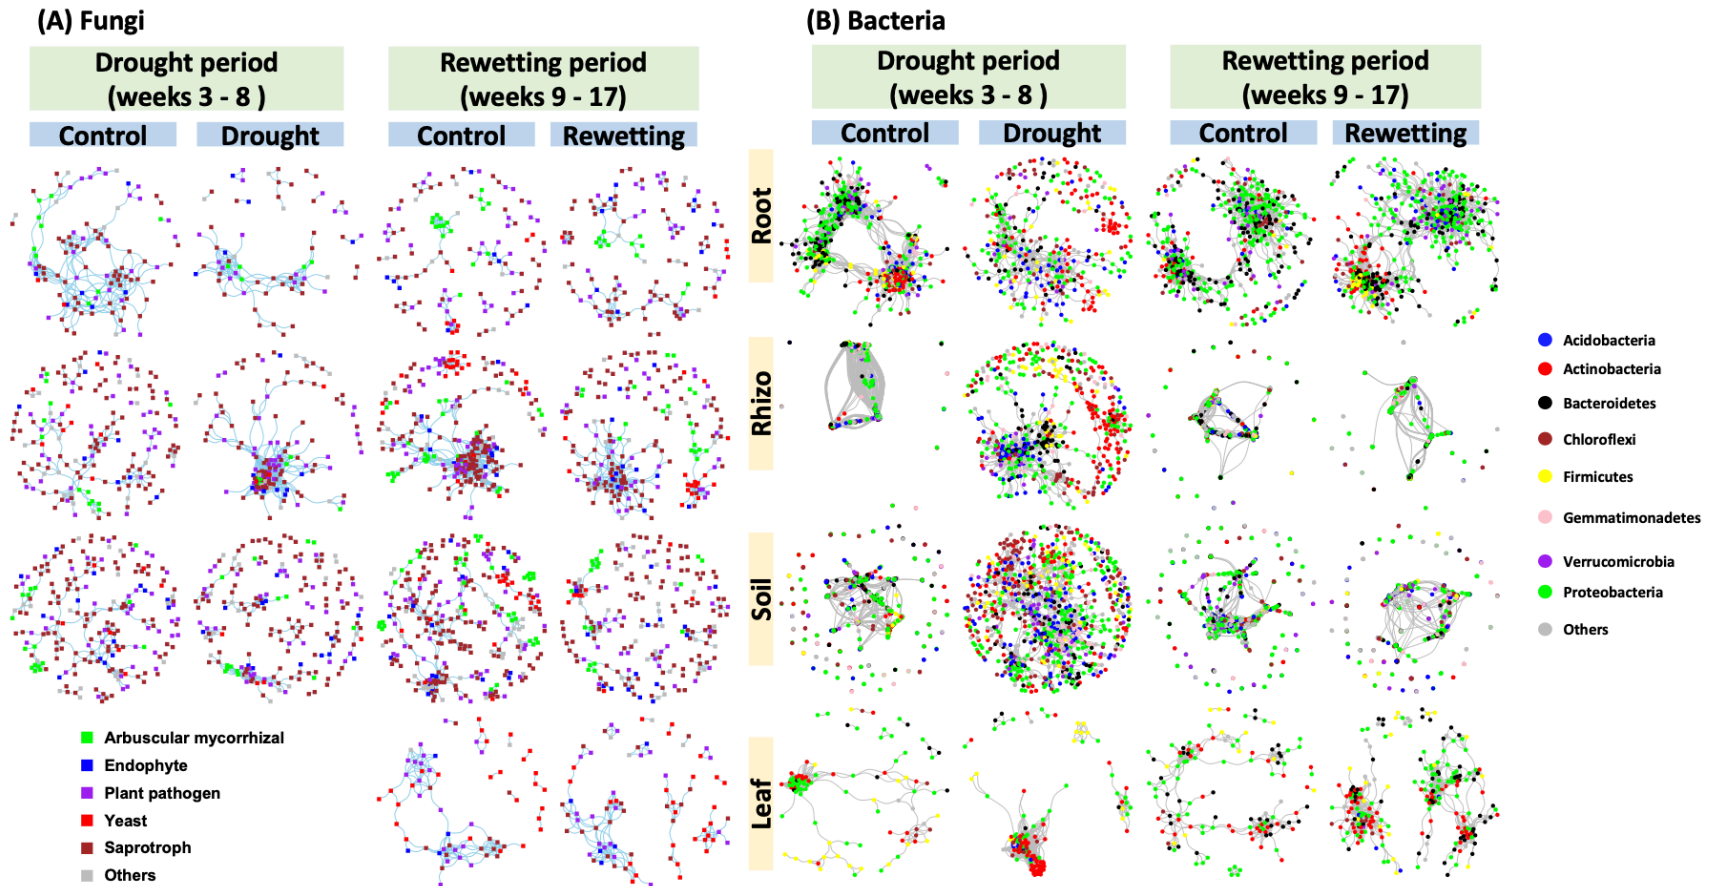

**Supplementary Fig. 18** Co-occurrence network using the Pearson method. (A) The fungal co-occurrence network in the rhizosphere is enhanced by drought, although it is disrupted in root. (B) The bacterial co-occurrence network in leaf is enhanced by drought, although it is disrupted in root, rhizosphere and soil. Rewetting caused recovery of both fungal and bacterial networks.



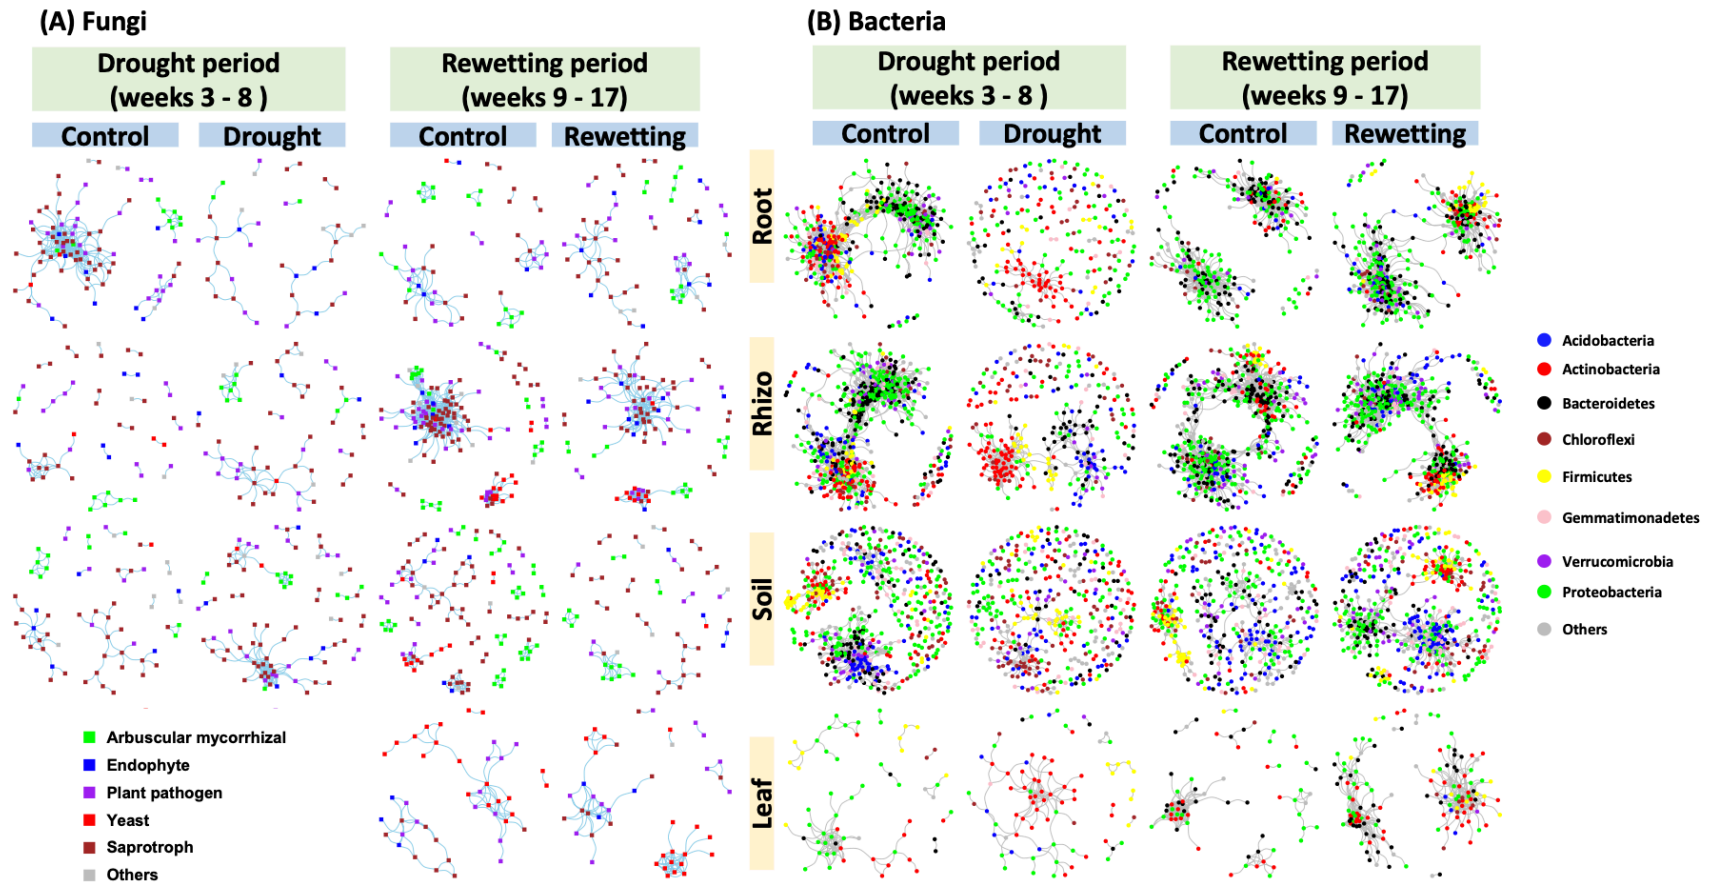

**Supplementary Fig. 19** Co-occurrence network using the CoDa method. (A) The fungal co-occurrence network in the rhizosphere is enhanced by drought, although it is disrupted in root. (B) The bacterial co-occurrence network in leaf is enhanced by drought, although it is disrupted in root, rhizosphere and soil. Rewetting caused recovery of both fungal and bacterial networks.

**Supplementary Table 1** Resistance & resilience of microbial community in response to drought disturbance

| Study        | Drought treatment                                                                                                                                                  | Resistance (drought effect)                                                                                                                     | Re-wetting treatment                 | Resilience (re-wetting)                                                                                                           | Note                          | Habitat                    |
|--------------|--------------------------------------------------------------------------------------------------------------------------------------------------------------------|-------------------------------------------------------------------------------------------------------------------------------------------------|--------------------------------------|-----------------------------------------------------------------------------------------------------------------------------------|-------------------------------|----------------------------|
| <sup>2</sup> | After one season of normal growth, during the second season, rain exclusion by placing transparent rain covers over the pots (three weeks)                         | Bacterial community was more strongly affected by drought than fungal community. Both significant                                               | One week or two months after drought | Control v. stress similarity remain significantly lower at re-watering than before drought for bacterial but not fungal community | 16S ITS                       | Soil / Grassland mesocosms |
| <sup>3</sup> | Natural dry-down in from wet April to dry Sep in California (lack of always watered control)                                                                       | Bacterial but not fungal community as strongly affected by drought                                                                              | Watering and sampling 2h later       | Bacterial community return to the status of wet April<br>Fungal community not changed directionally                               |                               | Soil / Grasslands          |
| <sup>4</sup> | Grassland (April) soil subjected to three treatments: weekly watering (four month), weekly watering (2month) followed by no water (2 month), no watering (4 month) | Bacterial communities not different among three treatments<br>Fungal community (RNA but not DNA) different between wet and dry treatment        | Watering and sampling 2h later       | Re-wetting affected bacterial community (RNA but not DNA)<br>Re-wetting do not affect fungal community                            |                               | Soil / greenhouse          |
| <sup>5</sup> | Rainout shelter (-66% precipitation)                                                                                                                               | Drought significantly altered the community composition of soil bacteria and, to a lesser extent, fungi (ns) in grasslands from two continents. |                                      |                                                                                                                                   |                               |                            |
| <sup>6</sup> | Monsoon Precipitation                                                                                                                                              | Fungal community is more affected by Monsoon Precipitation than bacterial community (note the confounding effect of fungal                      |                                      |                                                                                                                                   | 454 sequencing of 16S and ITS |                            |

|             |  |                                                                               |  |                                                                                   |      |  |
|-------------|--|-------------------------------------------------------------------------------|--|-----------------------------------------------------------------------------------|------|--|
|             |  | succession driven by<br>vegetation dynamics)                                  |  |                                                                                   |      |  |
| 7<br>8<br>9 |  | Greater ratio of fungi to<br>bacteria correlated with<br>decreased resistance |  | A greater ratio of<br>fungi to bacteria<br>correlated<br>increased<br>resilience. | PLFA |  |

**Supplementary Table 2.** Results of t tests on the resistance and resilience between bacterial community and fungal community at levels of operational taxonomic unit (OTU) and family. The P values were adjusted by Bonferroni method

| Compartment | Week | Property   | Level of fungi | t      | Padj     |
|-------------|------|------------|----------------|--------|----------|
| Root        | 3    | Resistance | Family         | -0.793 | 1.0E+00  |
| Root        | 3    | Resistance | OTU            | -1.281 | 1.0E+00  |
| Root        | 4    | Resistance | Family         | -1.135 | 1.0E+00  |
| Root        | 4    | Resistance | OTU            | -4.704 | 1.5E-04  |
| Root        | 5    | Resistance | Family         | -6.099 | 1.7E-05  |
| Root        | 5    | Resistance | OTU            | -7.977 | 1.8E-07  |
| Root        | 6    | Resistance | OTU            | 0.785  | 1.0E+00  |
| Root        | 6    | Resistance | Family         | -2.483 | 2.1E-01  |
| Root        | 7    | Resistance | Family         | 0.186  | 1.0E+00  |
| Root        | 7    | Resistance | OTU            | 1.562  | 7.6E-01  |
| Root        | 8    | Resistance | OTU            | -0.023 | 1.0E+00  |
| Root        | 8    | Resistance | Family         | -1.908 | 4.7E-01  |
| Root        | 9    | Resilience | Family         | 15.087 | 2.9E-41  |
| Root        | 9    | Resilience | OTU            | 17.084 | 3.9E-52  |
| Root        | 10   | Resilience | Family         | 6.257  | 7.8E-09  |
| Root        | 10   | Resilience | OTU            | 11.722 | 2.2E-27  |
| Root        | 11   | Resilience | OTU            | 27.278 | 3.5E-95  |
| Root        | 11   | Resilience | Family         | 47.572 | 5.2E-160 |
| Root        | 12   | Resilience | OTU            | 28.094 | 6.1E-115 |
| Root        | 12   | Resilience | Family         | 45.034 | 8.7E-196 |
| Root        | 13   | Resilience | OTU            | 23.005 | 8.8E-73  |
| Root        | 13   | Resilience | Family         | 50.493 | 3.7E-173 |
| Root        | 14   | Resilience | OTU            | 6.006  | 3.1E-08  |
| Root        | 14   | Resilience | Family         | 16.519 | 5.0E-47  |
| Root        | 15   | Resilience | Family         | 24.543 | 2.7E-79  |
| Root        | 15   | Resilience | OTU            | 25.289 | 5.9E-85  |
| Root        | 16   | Resilience | Family         | 10.123 | 8.2E-21  |
| Root        | 16   | Resilience | OTU            | 20.748 | 3.1E-71  |
| Root        | 17   | Resilience | Family         | 2.513  | 1.1E-01  |
| Root        | 17   | Resilience | OTU            | 3.019  | 2.4E-02  |
| Rhizosphere | 3    | Resistance | Family         | -1.588 | 7.2E-01  |
| Rhizosphere | 3    | Resistance | OTU            | -2.644 | 6.5E-02  |
| Rhizosphere | 4    | Resistance | Family         | -4.735 | 1.1E-04  |
| Rhizosphere | 4    | Resistance | OTU            | -7.491 | 1.0E-09  |
| Rhizosphere | 5    | Resistance | Family         | -4.719 | 1.7E-04  |

|             |    |            |        |         |          |
|-------------|----|------------|--------|---------|----------|
| Rhizosphere | 5  | Resistance | OTU    | -12.059 | 4.9E-15  |
| Rhizosphere | 6  | Resistance | Family | -4.130  | 1.6E-03  |
| Rhizosphere | 6  | Resistance | OTU    | -8.976  | 1.8E-09  |
| Rhizosphere | 7  | Resistance | OTU    | -2.597  | 7.4E-02  |
| Rhizosphere | 7  | Resistance | Family | 6.384   | 4.7E-07  |
| Rhizosphere | 8  | Resistance | OTU    | -1.179  | 1.0E+00  |
| Rhizosphere | 8  | Resistance | Family | 2.926   | 3.1E-02  |
| Rhizosphere | 9  | Resilience | OTU    | -30.498 | 5.9E-167 |
| Rhizosphere | 9  | Resilience | Family | -35.850 | 1.5E-214 |
| Rhizosphere | 10 | Resilience | OTU    | -1.940  | 4.7E-01  |
| Rhizosphere | 10 | Resilience | Family | -2.514  | 1.1E-01  |
| Rhizosphere | 11 | Resilience | Family | 9.162   | 2.0E-18  |
| Rhizosphere | 11 | Resilience | OTU    | 13.518  | 4.2E-38  |
| Rhizosphere | 12 | Resilience | OTU    | 24.078  | 1.9E-102 |
| Rhizosphere | 12 | Resilience | Family | 38.143  | 1.1E-202 |
| Rhizosphere | 13 | Resilience | Family | 47.101  | 0.0E+00  |
| Rhizosphere | 13 | Resilience | OTU    | 49.197  | 0.0E+00  |
| Rhizosphere | 14 | Resilience | OTU    | 5.625   | 1.9E-07  |
| Rhizosphere | 14 | Resilience | Family | 8.502   | 3.9E-16  |
| Rhizosphere | 15 | Resilience | OTU    | 36.976  | 1.6E-221 |
| Rhizosphere | 15 | Resilience | Family | 38.264  | 6.0E-227 |
| Rhizosphere | 16 | Resilience | Family | 8.208   | 3.7E-15  |
| Rhizosphere | 16 | Resilience | OTU    | 9.592   | 2.3E-20  |
| Rhizosphere | 17 | Resilience | OTU    | 8.124   | 7.3E-15  |
| Rhizosphere | 17 | Resilience | Family | 10.231  | 6.0E-23  |
| Soil        | 3  | Resistance | OTU    | -1.567  | 7.4E-01  |
| Soil        | 3  | Resistance | Family | -1.655  | 6.3E-01  |
| Soil        | 4  | Resistance | Family | -3.040  | 2.2E-02  |
| Soil        | 4  | Resistance | OTU    | -3.819  | 2.0E-03  |
| Soil        | 5  | Resistance | Family | 0.573   | 1.0E+00  |
| Soil        | 5  | Resistance | OTU    | 0.818   | 1.0E+00  |
| Soil        | 6  | Resistance | OTU    | -3.462  | 5.7E-03  |
| Soil        | 6  | Resistance | Family | -4.000  | 1.1E-03  |
| Soil        | 7  | Resistance | Family | -6.238  | 1.4E-06  |
| Soil        | 7  | Resistance | OTU    | -7.440  | 3.5E-09  |
| Soil        | 8  | Resistance | Family | -4.605  | 1.4E-04  |
| Soil        | 8  | Resistance | OTU    | -5.814  | 1.1E-06  |

**Table S3** The number and proportion of network edge and vertices removed due to FDR correction

| Network        | Compartment | Treatment | Period    | No.edges<br>FDR | No.edges<br>nFDR | Edges<br>Removed | No.vertices<br>FDR | No.vertices<br>nFDR | Vertices<br>Removed |
|----------------|-------------|-----------|-----------|-----------------|------------------|------------------|--------------------|---------------------|---------------------|
| Inter-Bac-Fung | Root        | Stress    | Drought   | 10              | 191              | 94.76%           | 17                 | 177                 | 90.40%              |
| Cross-Bac-Fung | Root        | Stress    | Drought   | 95              | 1130             | 91.59%           | 102                | 540                 | 81.11%              |
| Bac-Bac        | Root        | Stress    | Drought   | 77              | 888              | 91.33%           | 79                 | 448                 | 82.37%              |
| Fung-Fung      | Root        | Stress    | Drought   | 8               | 51               | 84.31%           | 13                 | 49                  | 73.47%              |
| Bac-Bac        | Soil        | Stress    | Drought   | 193             | 848              | 77.24%           | 187                | 611                 | 69.39%              |
| Inter-Bac-Fung | Soil        | Stress    | Drought   | 52              | 225              | 76.89%           | 73                 | 257                 | 71.60%              |
| Cross-Bac-Fung | Soil        | Stress    | Drought   | 272             | 1164             | 76.63%           | 263                | 814                 | 67.69%              |
| Fung-Fung      | Soil        | Stress    | Drought   | 27              | 91               | 70.33%           | 34                 | 86                  | 60.47%              |
| Inter-Bac-Fung | Soil        | Control   | Drought   | 274             | 408              | 32.84%           | 226                | 309                 | 26.86%              |
| Inter-Bac-Fung | Rhizosphere | Stress    | Drought   | 161             | 228              | 29.39%           | 143                | 185                 | 22.70%              |
| Cross-Bac-Fung | Rhizosphere | Stress    | Drought   | 811             | 1085             | 25.25%           | 439                | 536                 | 18.10%              |
| Bac-Bac        | Rhizosphere | Stress    | Drought   | 481             | 643              | 25.19%           | 324                | 395                 | 17.97%              |
| Cross-Bac-Fung | Soil        | Control   | Drought   | 1859            | 2482             | 25.10%           | 788                | 972                 | 18.93%              |
| Bac-Bac        | Soil        | Control   | Drought   | 1490            | 1956             | 23.82%           | 636                | 784                 | 18.88%              |
| Fung-Fung      | Rhizosphere | Stress    | Drought   | 169             | 214              | 21.03%           | 83                 | 95                  | 12.63%              |
| Fung-Fung      | Soil        | Control   | Drought   | 95              | 118              | 19.49%           | 74                 | 83                  | 10.84%              |
| Bac-Bac        | Leaf        | Control   | Drought   | 43              | 43               | 0                | 47                 | 47                  | 0                   |
| Bac-Bac        | Leaf        | Control   | Rewetting | 433             | 433              | 0                | 79                 | 79                  | 0                   |
| Bac-Bac        | Leaf        | Stress    | Drought   | 141             | 141              | 0                | 93                 | 93                  | 0                   |
| Bac-Bac        | Leaf        | Stress    | Rewetting | 1015            | 1015             | 0                | 138                | 138                 | 0                   |
| Bac-Bac        | Rhizosphere | Control   | Drought   | 10234           | 10234            | 0                | 887                | 887                 | 0                   |
| Bac-Bac        | Rhizosphere | Control   | Rewetting | 5050            | 5050             | 0                | 686                | 686                 | 0                   |

|                |             |         |           |       |       |   |      |      |   |
|----------------|-------------|---------|-----------|-------|-------|---|------|------|---|
| Bac-Bac        | Rhizosphere | Stress  | Rewetting | 13730 | 13730 | 0 | 761  | 761  | 0 |
| Bac-Bac        | Root        | Control | Drought   | 10518 | 10518 | 0 | 608  | 608  | 0 |
| Bac-Bac        | Root        | Control | Rewetting | 2755  | 2755  | 0 | 348  | 348  | 0 |
| Bac-Bac        | Root        | Stress  | Rewetting | 9030  | 9030  | 0 | 495  | 495  | 0 |
| Bac-Bac        | Soil        | Control | Rewetting | 1151  | 1151  | 0 | 590  | 590  | 0 |
| Bac-Bac        | Soil        | Stress  | Rewetting | 1879  | 1879  | 0 | 632  | 632  | 0 |
| Cross-Bac-Fung | Leaf        | Control | Drought   | 122   | 122   | 0 | 73   | 73   | 0 |
| Cross-Bac-Fung | Leaf        | Control | Rewetting | 554   | 554   | 0 | 117  | 117  | 0 |
| Cross-Bac-Fung | Leaf        | Stress  | Drought   | 189   | 189   | 0 | 117  | 117  | 0 |
| Cross-Bac-Fung | Leaf        | Stress  | Rewetting | 1436  | 1436  | 0 | 186  | 186  | 0 |
| Cross-Bac-Fung | Rhizosphere | Control | Drought   | 11116 | 11116 | 0 | 1036 | 1036 | 0 |
| Cross-Bac-Fung | Rhizosphere | Control | Rewetting | 7371  | 7371  | 0 | 896  | 896  | 0 |
| Cross-Bac-Fung | Rhizosphere | Stress  | Rewetting | 16408 | 16408 | 0 | 894  | 894  | 0 |
| Cross-Bac-Fung | Root        | Control | Drought   | 12684 | 12684 | 0 | 714  | 714  | 0 |
| Cross-Bac-Fung | Root        | Control | Rewetting | 3478  | 3478  | 0 | 433  | 433  | 0 |
| Cross-Bac-Fung | Root        | Stress  | Rewetting | 11000 | 11000 | 0 | 596  | 596  | 0 |
| Cross-Bac-Fung | Soil        | Control | Rewetting | 1505  | 1505  | 0 | 760  | 760  | 0 |
| Cross-Bac-Fung | Soil        | Stress  | Rewetting | 2127  | 2127  | 0 | 749  | 749  | 0 |
| Inter-Bac-Fung | Leaf        | Control | Drought   | 3     | 3     | 0 | 5    | 5    | 0 |
| Inter-Bac-Fung | Leaf        | Control | Rewetting | 82    | 82    | 0 | 46   | 46   | 0 |
| Inter-Bac-Fung | Leaf        | Stress  | Drought   | 2     | 2     | 0 | 4    | 4    | 0 |
| Inter-Bac-Fung | Leaf        | Stress  | Rewetting | 331   | 331   | 0 | 96   | 96   | 0 |
| Inter-Bac-Fung | Rhizosphere | Control | Drought   | 777   | 777   | 0 | 391  | 391  | 0 |
| Inter-Bac-Fung | Rhizosphere | Control | Rewetting | 1529  | 1529  | 0 | 437  | 437  | 0 |
| Inter-Bac-Fung | Rhizosphere | Stress  | Rewetting | 2398  | 2398  | 0 | 474  | 474  | 0 |
| Inter-Bac-Fung | Root        | Control | Drought   | 1840  | 1840  | 0 | 417  | 417  | 0 |
| Inter-Bac-Fung | Root        | Control | Rewetting | 619   | 619   | 0 | 246  | 246  | 0 |
| Inter-Bac-Fung | Root        | Stress  | Rewetting | 1836  | 1836  | 0 | 409  | 409  | 0 |

|                |             |         |           |     |     |   |     |     |   |
|----------------|-------------|---------|-----------|-----|-----|---|-----|-----|---|
| Inter-Bac-Fung | Soil        | Control | Rewetting | 161 | 161 | 0 | 145 | 145 | 0 |
| Inter-Bac-Fung | Soil        | Stress  | Rewetting | 167 | 167 | 0 | 157 | 157 | 0 |
| Fung-Fung      | Leaf        | Control | Drought   | 76  | 76  | 0 | 24  | 24  | 0 |
| Fung-Fung      | Leaf        | Control | Rewetting | 39  | 39  | 0 | 31  | 31  | 0 |
| Fung-Fung      | Leaf        | Stress  | Drought   | 46  | 46  | 0 | 22  | 22  | 0 |
| Fung-Fung      | Leaf        | Stress  | Rewetting | 90  | 90  | 0 | 42  | 42  | 0 |
| Fung-Fung      | Rhizosphere | Control | Drought   | 105 | 105 | 0 | 77  | 77  | 0 |
| Fung-Fung      | Rhizosphere | Control | Rewetting | 792 | 792 | 0 | 159 | 159 | 0 |
| Fung-Fung      | Rhizosphere | Stress  | Rewetting | 280 | 280 | 0 | 94  | 94  | 0 |
| Fung-Fung      | Root        | Control | Drought   | 326 | 326 | 0 | 91  | 91  | 0 |
| Fung-Fung      | Root        | Control | Rewetting | 104 | 104 | 0 | 64  | 64  | 0 |
| Fung-Fung      | Root        | Stress  | Rewetting | 134 | 134 | 0 | 69  | 69  | 0 |
| Fung-Fung      | Soil        | Control | Rewetting | 193 | 193 | 0 | 131 | 131 | 0 |
| Fung-Fung      | Soil        | Stress  | Rewetting | 81  | 81  | 0 | 75  | 75  | 0 |



**Table S4** Non-random topological features indicated by comparing empirical network against random networks (P values were calculated by one-sample t-test (two-sided) and adjusted by Bonferroni method)

| Compartment | Treatment | Period    | Network Indexes                | Observation | Random network (mean $\pm$ sd) | P value   |
|-------------|-----------|-----------|--------------------------------|-------------|--------------------------------|-----------|
| Root        | Control   | Drought   | Average clustering coefficient | 0.404       | 0.221 $\pm$ 0.012              | 6.22E-123 |
| Root        | Control   | Rewetting | Average clustering coefficient | 0.427       | 0.25 $\pm$ 0.013               | 4.54E-118 |
| Root        | Stress    | Drought   | Average clustering coefficient | 0.094       | 0.016 $\pm$ 0.005              | 6.59E-124 |
| Root        | Stress    | Rewetting | Average clustering coefficient | 0.461       | 0.278 $\pm$ 0.012              | 6.22E-123 |
| Root        | Control   | Drought   | Average path distance          | 2.916       | 2.666 $\pm$ 0.024              | 1.35E-106 |
| Root        | Control   | Rewetting | Average path distance          | 3.077       | 2.656 $\pm$ 0.027              | 6.89E-124 |
| Root        | Stress    | Drought   | Average path distance          | 6.065       | 4.533 $\pm$ 0.08               | 1.03E-132 |
| Root        | Stress    | Rewetting | Average path distance          | 3.111       | 2.554 $\pm$ 0.021              | 1.04E-146 |
| Root        | Control   | Drought   | Transitivity                   | 0.424       | 0.253 $\pm$ 0.006              | 8.48E-150 |
| Root        | Control   | Rewetting | Transitivity                   | 0.387       | 0.256 $\pm$ 0.007              | 1.01E-131 |
| Root        | Stress    | Drought   | Transitivity                   | 0.29        | 0.03 $\pm$ 0.006               | 8.15E-168 |
| Root        | Stress    | Rewetting | Transitivity                   | 0.445       | 0.296 $\pm$ 0.006              | 7.06E-144 |
| Rhizosphere | Control   | Drought   | Average clustering coefficient | 0.267       | 0.074 $\pm$ 0.01               | 4.79E-133 |
| Rhizosphere | Control   | Rewetting | Average clustering coefficient | 0.321       | 0.141 $\pm$ 0.011              | 5.84E-126 |
| Rhizosphere | Stress    | Drought   | Average clustering coefficient | 0.162       | 0.046 $\pm$ 0.007              | 1.68E-126 |
| Rhizosphere | Stress    | Rewetting | Average clustering coefficient | 0.45        | 0.3 $\pm$ 0.013                | 5.63E-111 |
| Rhizosphere | Control   | Drought   | Average path distance          | 4.449       | 3.261 $\pm$ 0.05               | 5.59E-142 |
| Rhizosphere | Control   | Rewetting | Average path distance          | 3.804       | 2.99 $\pm$ 0.034               | 2.63E-142 |
| Rhizosphere | Stress    | Drought   | Average path distance          | 4.642       | 3.587 $\pm$ 0.042              | 2.27E-144 |
| Rhizosphere | Stress    | Rewetting | Average path distance          | 2.921       | 2.62 $\pm$ 0.022               | 2.81E-118 |
| Rhizosphere | Control   | Drought   | Transitivity                   | 0.283       | 0.098 $\pm$ 0.008              | 8.15E-141 |
| Rhizosphere | Control   | Rewetting | Transitivity                   | 0.354       | 0.175 $\pm$ 0.008              | 2.13E-139 |
| Rhizosphere | Stress    | Drought   | Transitivity                   | 0.373       | 0.089 $\pm$ 0.007              | 5.54E-165 |

|             |         |           |                                |       |               |           |
|-------------|---------|-----------|--------------------------------|-------|---------------|-----------|
| Rhizosphere | Stress  | Rewetting | Transitivity                   | 0.365 | 0.266 ± 0.006 | 2.58E-126 |
| Soil        | Control | Drought   | Average clustering coefficient | 0.175 | 0.041 ± 0.009 | 6.64E-122 |
| Soil        | Stress  | Drought   | Average clustering coefficient | 0.135 | 0.011 ± 0.004 | 2.05E-153 |
| Soil        | Stress  | Rewetting | Average clustering coefficient | 0.166 | 0.017 ± 0.004 | 2.61E-161 |
| Soil        | Control | Rewetting | Average clustering coefficient | 0.169 | 0.014 ± 0.004 | 5.25E-163 |
| Soil        | Control | Drought   | Average path distance          | 4.586 | 3.664 ± 0.057 | 1.84E-125 |
| Soil        | Stress  | Drought   | Average path distance          | 6.039 | 4.72 ± 0.099  | 3.87E-117 |
| Soil        | Stress  | Rewetting | Average path distance          | 5.734 | 4.254 ± 0.054 | 4.06E-148 |
| Soil        | Control | Rewetting | Average path distance          | 6.379 | 4.48 ± 0.049  | 5.17E-163 |
| Soil        | Control | Drought   | Transitivity                   | 0.374 | 0.067 ± 0.008 | 1.37E-162 |
| Soil        | Stress  | Drought   | Transitivity                   | 0.249 | 0.022 ± 0.006 | 5.59E-162 |
| Soil        | Stress  | Rewetting | Transitivity                   | 0.266 | 0.028 ± 0.005 | 7.48E-172 |
| Soil        | Control | Rewetting | Transitivity                   | 0.268 | 0.023 ± 0.004 | 1.08E-182 |
| Leaf        | Control | Rewetting | Average clustering coefficient | 0.4   | 0.383 ± 0.018 | 4.96E-16  |
| Leaf        | Stress  | Rewetting | Average clustering coefficient | 0.377 | 0.338 ± 0.018 | 7.10E-42  |
| Leaf        | Control | Rewetting | Average path distance          | 4.093 | 2.492 ± 0.048 | 1.47E-156 |
| Leaf        | Stress  | Rewetting | Average path distance          | 3.087 | 2.584 ± 0.034 | 1.25E-121 |
| Leaf        | Control | Rewetting | Transitivity                   | 0.644 | 0.483 ± 0.012 | 1.94E-117 |
| Leaf        | Stress  | Rewetting | Transitivity                   | 0.536 | 0.399 ± 0.01  | 2.47E-118 |

Random networks were generated at the Molecular Ecological Network Analyses Pipeline (MENAP) by randomly rewiring all the links while keeping the numbers of nodes and links of the empirical network.

## References

- 1 Coenen, A. R., Hu, S. K., Luo, E., Muratore, D. & Weitz, J. S. A primer for microbiome time-series analysis. *Front. Genet.* **11** (2020).
- 2 de Vries, F. T. *et al.* Soil bacterial networks are less stable under drought than fungal networks. *Nat. Commun.* **9**, 3033 (2018).
- 3 Barnard, R. L., Osborne, C. A. & Firestone, M. K. Responses of soil bacterial and fungal communities to extreme desiccation and rewetting. *ISME J.* **7**, 2229-2241 (2013).
- 4 Barnard, R. L., Osborne, C. A. & Firestone, M. K. Changing precipitation pattern alters soil microbial community response to wet-up under a Mediterranean-type climate. *The ISME Journal* **9**, 946-957 (2015).
- 5 Ochoa-Hueso, R. *et al.* Drought consistently alters the composition of soil fungal and bacterial communities in grasslands from two continents. *Global Change Biology* **24**, 2818-2827 (2018).
- 6 McHugh, T. A., Koch, G. W. & Schwartz, E. Minor changes in soil bacterial and fungal community composition occur in response to monsoon precipitation in a semiarid grassland. *Microb. Ecol.* **68**, 370-378 (2014).
- 7 de Vries, F. T. & Shade, A. Controls on soil microbial community stability under climate change. *Front Microbiol* **4**, 265 (2013).
- 8 de Vries, F. T. *et al.* Land use alters the resistance and resilience of soil food webs to drought. *Nat. Clim. Chang.* **2**, 276 (2012).
- 9 de Vries, F. T. *et al.* Legacy effects of drought on plant growth and the soil food web. *Oecologia* **170**, 821-833 (2012).
