# Supplementary material for: Co-occurrence networks reveal more complexity than community composition in resistance and resilience of microbial communities
Source: PubMed Central journal article supplement (PMC9256619; doi:10.1038/s41467-022-31343-y), 2022-07-05
Supplement: 41467_2022_31343_MOESM2_ESM.pdf [file 41467_2022_31343_MOESM2_ESM.pdf]

## Reporting Summary

Nature Research wishes to improve the reproducibility of the work that we publish. This form provides structure for consistency and transparency in reporting. For further information on Nature Research policies, see our [Editorial Policies](#) and the [Editorial Policy Checklist](#).

### Statistics

For all statistical analyses, confirm that the following items are present in the figure legend, table legend, main text, or Methods section.

n/a Confirmed

- |                                     |                                     |                                                                                                                                                                                                                                                            |
|-------------------------------------|-------------------------------------|------------------------------------------------------------------------------------------------------------------------------------------------------------------------------------------------------------------------------------------------------------|
| <input type="checkbox"/>            | <input checked="" type="checkbox"/> | The exact sample size ( $n$ ) for each experimental group/condition, given as a discrete number and unit of measurement                                                                                                                                    |
| <input type="checkbox"/>            | <input checked="" type="checkbox"/> | A statement on whether measurements were taken from distinct samples or whether the same sample was measured repeatedly                                                                                                                                    |
| <input type="checkbox"/>            | <input checked="" type="checkbox"/> | The statistical test(s) used AND whether they are one- or two-sided<br><i>Only common tests should be described solely by name; describe more complex techniques in the Methods section.</i>                                                               |
| <input checked="" type="checkbox"/> | <input type="checkbox"/>            | A description of all covariates tested                                                                                                                                                                                                                     |
| <input type="checkbox"/>            | <input checked="" type="checkbox"/> | A description of any assumptions or corrections, such as tests of normality and adjustment for multiple comparisons                                                                                                                                        |
| <input type="checkbox"/>            | <input checked="" type="checkbox"/> | A full description of the statistical parameters including central tendency (e.g. means) or other basic estimates (e.g. regression coefficient) AND variation (e.g. standard deviation) or associated estimates of uncertainty (e.g. confidence intervals) |
| <input type="checkbox"/>            | <input checked="" type="checkbox"/> | For null hypothesis testing, the test statistic (e.g. $F$ , $t$ , $r$ ) with confidence intervals, effect sizes, degrees of freedom and $P$ value noted<br><i>Give <math>P</math> values as exact values whenever suitable.</i>                            |
| <input checked="" type="checkbox"/> | <input type="checkbox"/>            | For Bayesian analysis, information on the choice of priors and Markov chain Monte Carlo settings                                                                                                                                                           |
| <input checked="" type="checkbox"/> | <input type="checkbox"/>            | For hierarchical and complex designs, identification of the appropriate level for tests and full reporting of outcomes                                                                                                                                     |
| <input type="checkbox"/>            | <input checked="" type="checkbox"/> | Estimates of effect sizes (e.g. Cohen's $d$ , Pearson's $r$ ), indicating how they were calculated                                                                                                                                                         |

*Our web collection on [statistics for biologists](#) contains articles on many of the points above.*

### Software and code

Policy information about [availability of computer code](#)

Data collection

Data analysis

For manuscripts utilizing custom algorithms or software that are central to the research but not yet described in published literature, software must be made available to editors and reviewers. We strongly encourage code deposition in a community repository (e.g. GitHub). See the Nature Research [guidelines for submitting code & software](#) for further information.

### Data

Policy information about [availability of data](#)

All manuscripts must include a [data availability statement](#). This statement should provide the following information, where applicable:

- Accession codes, unique identifiers, or web links for publicly available datasets
- A list of figures that have associated raw data
- A description of any restrictions on data availability

No new data were generated in this study. The data used in this study had been deposited in the Sequence Read Archive database under accession code PRJNA412410 [<https://www.ncbi.nlm.nih.gov/bioproject/PRJNA412410>], PRJNA494573 [<https://www.ncbi.nlm.nih.gov/bioproject/PRJNA494573>], PRJNA435634 [<https://www.ncbi.nlm.nih.gov/bioproject/PRJNA435634>], PRJNA435642 [<https://www.ncbi.nlm.nih.gov/bioproject/PRJNA435642>], and PRJNA435643 [<https://www.ncbi.nlm.nih.gov/bioproject/PRJNA435643>]. Source data are provided as a Source Data file.

## Field-specific reporting

Please select the one below that is the best fit for your research. If you are not sure, read the appropriate sections before making your selection.

Life sciences  Behavioural & social sciences  Ecological, evolutionary & environmental sciences

For a reference copy of the document with all sections, see [nature.com/documents/nr-reporting-summary-flat.pdf](https://www.nature.com/documents/nr-reporting-summary-flat.pdf)

## Ecological, evolutionary & environmental sciences study design

All studies must disclose on these points even when the disclosure is negative.

|                                   |                                                                                                                                                                                                                                                                                                                                                                                                                                                                                                                                                                                                                                                                                                                                |
|-----------------------------------|--------------------------------------------------------------------------------------------------------------------------------------------------------------------------------------------------------------------------------------------------------------------------------------------------------------------------------------------------------------------------------------------------------------------------------------------------------------------------------------------------------------------------------------------------------------------------------------------------------------------------------------------------------------------------------------------------------------------------------|
| Study description                 | Our research had three blocks each consisted of 6 randomly distributed plots representing an full factorial interaction of three treatments and two sorghum cultivars. We collected root, rhizosphere, soil and leaf samples weekly over 17 weeks. For each sample, we used amplicon sequencing to detect bacterial and fungal communities                                                                                                                                                                                                                                                                                                                                                                                     |
| Research sample                   | We collected 1026 sample from three treatments, two sorghum cultivars, 17 time points and four compartments. Three treatments: control, pre-flowering drought and post-flowering drought; Two sorghum cultivars: the pre-flowering, drought tolerant sorghum cultivar RTx430, and the post-flowering, drought tolerant (or 'stay green') cultivar BTx642; Four compartments: Leaf, Root, Rhizosphere, and Soil                                                                                                                                                                                                                                                                                                                 |
| Sampling strategy                 | For each plot at each sampling date, at least ten individual sorghum plants were removed to collect leaf, root and rhizosphere samples. The 3rd and 4th youngest, fully expanded leaves of the ten plants were collected as a leaf sample. Roots removed from the ten plants were washed with phosphate buffer, and the liquids were centrifuged to collect a rhizosphere sample. Soil was collected adjacent to the ten sampled plants using soil collection tubes. The rationale for sampling at least ten sorghum individuals is to satisfy the analysis of multi-Omics, and this sample size has been proven to be sufficient for the analysis of amplicon and metagenomic sequencing, transcriptome, and metabolome, etc. |
| Data collection                   | DNA was extracted from 1026 samples. ITS2 and 16S was amplified and subject to library preparation. Libraries were sequenced by Illumina Miseq PE300 at the Vincent J. Coates Genomics Sequencing Laboratory (GSL, University of California, Berkeley, CA, USA). Raw sequencing were filtered and clustered into OTUs using Usearch. Ling Xu, Cheng Gao, Liliam Montoya extracted DNAs, library preparation and sequencing. Cheng Gao and Ling Xu carried out the Bioinformatic analysis.                                                                                                                                                                                                                                      |
| Timing and spatial scale          | Weekly samples of leaf, root, rhizosphere and soil were taken in 2016 for control plots on June 8, 15, 22, 29; July 6, 13, 20, 27; August 3, 10, 17, 24, 31, and September 7, 14, 21, 28. Our time scale covered the life cycle of sorghum from seedling to maturation. Our research has 18 plots (16m * 8m each) in a 76 m * 56 m field.                                                                                                                                                                                                                                                                                                                                                                                      |
| Data exclusions                   | No data was excluded from the analysis                                                                                                                                                                                                                                                                                                                                                                                                                                                                                                                                                                                                                                                                                         |
| Reproducibility                   | Our experiment used three replicate block of each treatment, and we confirm that all attempts at replications were successful.                                                                                                                                                                                                                                                                                                                                                                                                                                                                                                                                                                                                 |
| Randomization                     | Our experiment is a random block design of three replicates.                                                                                                                                                                                                                                                                                                                                                                                                                                                                                                                                                                                                                                                                   |
| Blinding                          | Blinding is not possible for our research as obvious drought-related plant phenotypes are visible to collectors at sampling stage                                                                                                                                                                                                                                                                                                                                                                                                                                                                                                                                                                                              |
| Did the study involve field work? | <input checked="" type="checkbox"/> Yes <input type="checkbox"/> No                                                                                                                                                                                                                                                                                                                                                                                                                                                                                                                                                                                                                                                            |

## Field work, collection and transport

|                        |                                                                                                                                                                                                                  |
|------------------------|------------------------------------------------------------------------------------------------------------------------------------------------------------------------------------------------------------------|
| Field conditions       | Our agricultural field is located in the Central Valley, a semiarid zone with a mean annual temperature of 17.8°C and mean annual precipitation of 325 mm, almost all of which falls between November and April. |
| Location               | 36.6008° N, 119.5109° W                                                                                                                                                                                          |
| Access & import/export | No permit is required to work on sorghum in California                                                                                                                                                           |
| Disturbance            | No disturbance to natural environment                                                                                                                                                                            |

## Reporting for specific materials, systems and methods

We require information from authors about some types of materials, experimental systems and methods used in many studies. Here, indicate whether each material, system or method listed is relevant to your study. If you are not sure if a list item applies to your research, read the appropriate section before selecting a response.

## Materials & experimental systems

| n/a                                 | Involvement in the study                               |
|-------------------------------------|--------------------------------------------------------|
| <input checked="" type="checkbox"/> | <input type="checkbox"/> Antibodies                    |
| <input checked="" type="checkbox"/> | <input type="checkbox"/> Eukaryotic cell lines         |
| <input checked="" type="checkbox"/> | <input type="checkbox"/> Palaeontology and archaeology |
| <input checked="" type="checkbox"/> | <input type="checkbox"/> Animals and other organisms   |
| <input checked="" type="checkbox"/> | <input type="checkbox"/> Human research participants   |
| <input checked="" type="checkbox"/> | <input type="checkbox"/> Clinical data                 |
| <input checked="" type="checkbox"/> | <input type="checkbox"/> Dual use research of concern  |

## Methods

| n/a                                 | Involvement in the study                        |
|-------------------------------------|-------------------------------------------------|
| <input checked="" type="checkbox"/> | <input type="checkbox"/> ChIP-seq               |
| <input checked="" type="checkbox"/> | <input type="checkbox"/> Flow cytometry         |
| <input checked="" type="checkbox"/> | <input type="checkbox"/> MRI-based neuroimaging |
