# Supplementary material for: Co-occurrence networks reveal more complexity than community composition in resistance and resilience of microbial communities
Source: PubMed Central journal article supplement (PMC9256619; doi:10.1038/s41467-022-31343-y), 2022-07-05
Supplement: 41467_2022_31343_MOESM3_ESM.pdf [file 41467_2022_31343_MOESM3_ESM.pdf]

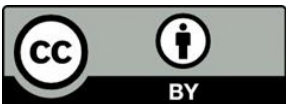

**Open Access** This file is licensed under a Creative Commons Attribution 4.0 International License, which permits use, sharing, adaptation, distribution and reproduction in any medium or format, as long as you give appropriate credit to the original author(s) and the source, provide a link to the Creative Commons license, and indicate if changes were made. In the cases where the authors are anonymous, such as is the case for the reports of anonymous peer reviewers, author attribution should be to 'Anonymous Referee' followed by a clear attribution to the source work. The images or other third party material in this file are included in the article's Creative Commons license, unless indicated otherwise in a credit line to the material. If material is not included in the article's Creative Commons license and your intended use is not permitted by statutory regulation or exceeds the permitted use, you will need to obtain permission directly from the copyright holder. To view a copy of this license, visit <http://creativecommons.org/licenses/by/4.0/>.

## **Reviewer comments, first round –**

### **Reviewer #1 (Remarks to the Author):**

This study investigated the resilience and resistance of Sorghum-associated bacterial and fungal communities against drought. The strength of the study for me is that it targeted both bacteria and fungi and studies these communities in all relevant soil and plant compartments (soil, rhizosphere and leaf). The authors rightly point out that most studies have focused on bacteria alone, and often on a single microbial compartment.

I found the study interesting and believe it will interest others in the field, as there is considerable interest in understanding resilience and resistance in microbial communities, and this study's comprehensive experimental design makes it a likely important article for those in the field.

The authors analysed and discussed positive microbial interactions and related this to resilience and resistance. As many of the studies that linked positive interactions with resilience and resistance are based on macro-ecological studies, it would be relevant to provide some context for microbial studies which also looked more specifically at positive associations in networks. There are a few studies that looked at the ratio of positive interactions in microbial networks in relation to ecological status, especially ecological succession, and the authors didn't mention these studies. I suggest including some of these studies in their discussion: e.g. 10.3389/fmicb.2019.02887; 10.1038/ismej.2014.54; 10.1111/1751-7915.13487; 10.3389/fmicb.2015.01200 and references therein.

On a more general note, the authors take the correlations as an indication of interactions, however, correlations may derive from habitat-filtering or dispersal limitation processes, in which case, inferring resilience and resistance may be less straightforward. Indeed, this may be a possible reason for some of the results obtained by the authors which led to the rejection of some of their hypotheses. In other words, if the authors were able to remove correlations that were not due to habitat filtering, and particularly due to dispersal limitation, then the remaining correlations may support their original hypotheses. Partitioning correlations due to dispersal limitation, habitat filtering and interactions may not be possible in most cases, but for soil samples (and perhaps rhizosphere), it may be possible if the authors have the spatial coordinates for each sample (more details here: 10.1111/1755-0998.13079). At least the authors should acknowledge the issue that correlations may be due to other processes than interactions.

In lines 176-179 the authors state that resistance is  $1-R_2$  (when comparing control and droughted communities) and resilience is  $1-R$  (when comparing control and re-wetted communities). However, in lines 180-186 (and in the figures and tables), the authors detail and discuss  $R_2$  values, rather than  $1-R_2$ . Perhaps this can be simplified? Since  $R_2$  is related to the level of change between treatments, perhaps the  $1-R_2$  definition is not needed?

In Figure 1 is the significance indicated in every compartment for what comparison exactly? Could the authors detail this in the legend? As the authors use the  $R_2$  as a measure of resilience and resistance, to claim for instance that "that the fungal mycobiome is more resistant than the bacterial microbiome to both pre- and post- flowering drought", it would be important to show that these differences in  $R_2$  between bacteria and fungi are significant.

Other comments:

Line 248 "rewatered" should be re-wetted for consistency.

Line 258: Is network modularity determined by the number of modules detected?

Line 341, what is -- for?

Lines 467-469: were the p-values corrected for multiple testing? If not, why?

### **Reviewer #2 (Remarks to the Author):**

The ms describes a new analysis based on the recombination of two previously published datasets that examines resistance and resilience of microbial communities (bacteria and fungi) associated with leaves, roots, rhizosphere, and surrounding soil of an agricultural crop, sorghum, subjected to

drought stress. Using modern methodology (e.g., rDNA metabarcoding) the group finds that drought disrupts the plant-associated microbial communities and that co-occurrence networks among functional guilds of rhizosphere fungi and leaf bacteria were "dramatically strengthened" in the pre-flowering drought treatment. The ms frames these findings within the context of the classical stress gradient hypothesis, and also suggests that microbial 'hub' taxa could be identified that might have utility as seed-taxa serving to support the microbial communities overall under drought stress expected with climate change scenarios.

While I feel that the ms represents an important contribution to the field, especially considering the cited deficits of previously published works that focus on agriculture, I feel that the ms is not yet ready for publication. I recommend a significant revision that addresses the following important issues:

>>Language awkwardness/precision/directness: I find the language of the ms to be very awkward in several sections and in some areas the language also lacks precision and also could be edited to be more straightforward. I present a few examples (primarily from the Introduction) here...

Introduction: starting @ line 57 (drought...drought/plant gene...plant genes) - "When drought curtails photosynthesis in response to drought the most profound change in plant gene transcription is the down regulation of plant genes involved in managing microbial association and this change in expression correlates with a decline in the abundances of these root-associated microbes." ... consider, "One of the most profound changes in plant transcription in response to drought is the down regulation of genes involved in managing microbial association that can result in a reduction in abundance of root-associated microbes."

Introduction: starting @ line 81 - "We surveyed previous research that included both fungi and bacteria from the perspective of the community compositional response to drought and subsequent rewetting (Table S1) finding that H1 has been both supported and falsified, and H2 has been either falsified or untested." ... consider, "We surveyed the literature for research that addressed community composition shifts, for both fungi and bacteria, in response to drought and subsequent rewetting (Table S1) finding that H1 has been both supported and refuted, while H2 has either been refuted or remains untested."

Introduction: starting @ line 96 - "Here, to advance our aim of including microbe-plant interaction in efforts to combat crop loss due to drought, we test these hypotheses, H1 and H2, through comparisons of microbial communities in four compartments (leaf, root, rhizosphere and soil) in fields of sorghum during these three treatments, when drought imposed prior to flowering, when this preflowering drought is relieved by watering, and when drought is imposed after flowering." ... from my reading of the methods, this study was carried out during drought conditions (i.e., it was not "imposed") in CA with crops being subjected to watering (rewetting) or not, consider, "In this study we focused on both bacterial- and fungal-plant interaction, examining hypotheses H1 and H2 for microbial communities associated with sorghum leaves, roots, rhizosphere, and surrounding soils in agricultural fields under drought conditions that were relieved post-flowering by watering or not." Further, while I agree that the results from this study provide insights that might be helpful in efforts to "combat crop loss", the study did not directly address "crop loss" and, therefore, statements such as this are likely a bit of an overreach.

Introduction: starting @ line 109 (Bacteria are typically considered a Domain, while Fungi are typically considered a Kingdom) - "For example, regarding drought stress, it has been proposed that positive interactions should increase in frequency under stressful conditions, a response explained by the stress gradient hypothesis. It also has been proposed from studies of microbes on Arabidopsis leaves, roots and soil, that correlations between microbes within kingdoms tend to be positive, while correlations between kingdoms tend to be negative. Additionally, ecological modeling has indicated that negative interactions should promote stability...." ... consider, "For example, it has been proposed that positive microbial interactions should increase in frequency under stress scenarios, such as drought, a response explained by the stress gradient hypothesis (SGH). Further, stress studies of microbes on Arabidopsis leaves, roots, and the surrounding soils suggest that within-taxonomic group microbial interactions tend to be positive, while those between-taxonomic groups are negative. Ecological modeling also indicates...." Further, microbial

interactions, which biological/ecological in nature, should not be confused with correlation, which is simply a statistical method. For example, positive correlations related to shifting microbial abundances might be interpreted as mutualist interactions (or facilitation), while negative correlations might be interpreted as antagonistic interactions (or competition). The paper tends to confuse these concepts a bit (see comments immediately above and below), and the authors should bear in mind that they are attempting to view/interpret microbial interactions through the lens of statistical correlation (e.g., correlations metrics are appropriate for the results, but the interpretation (i.e., in discussion) should focus on the interactions).

Introduction: starting @ line 112 - "Using these studies to frame hypotheses at the all-correlation level, for our resistance hypothesis, H1, under drought we expect an increase in the proportion of positive correlation most strongly for B-B, followed by F-F, and lastly by B-F correlation; and for our resilience hypothesis, H2, under re-watering, we expect a decrease in the proportion of positive correlation most strongly for B-B, followed by F-F, and lastly by B-F correlation." This sentence does not entirely make sense given the discussion as the proposed hypotheses are not: A) clearly defined overall; B) completely consistent with the studies mentioned; or C) differently defined for resistance vs. resilience - also, I'm not sure what phrases like "all-correlation level" mean ...consider, "These previous studies provide a framework for the hypotheses we propose here, namely under the stress of drought, we expect enhanced facilitation within taxonomic groups (i.e., positive correlations for B-B and F-F) and enhanced competition between taxonomic groups (i.e., negative correlation for B-F). Further, the hypotheses proposed by authors in the ms need to be distinguished from those of other work (i.e., those associated with SGH) and more clearly defined and consistent overall. For example, the hypotheses mentioned in the abstract focus on fungi and state that fungi are "(i) more resistant but (ii) less resilient than bacteria" (we assume this refers there respective status under the stress or drought), while the H1 and H2 mentioned here focus on interactions.

Introduction: paragraph @ line 118-136 - I find this paragraph to be confusing and repetitive with respect to the hypotheses (and see above) overall, the discussion of "nonintuitive outcomes" is a bit obtuse and appears to be splitting hairs (to justify results/methods?). Also, "Simplifying matters by focusing on just the significant, positive correlations" - if a correlation is not significant then it should not be considered as a result at all; further, the paragraph above and H1/H2 stress the importance of validating negative correlations. This paragraph appears to be justification for the methods used in the co-occurrence network analysis part of the study, but the case could be more clearly and directly made (i.e., this is a common method for such analyses).

Introduction: starting @ line 137 - The authors should note different terminology typically use in distinguishing between network element vs. network properties. For example, 'modules' are network elements (functional units of connectedness within the network) whereas 'modularity' is a network property (the characteristic of being divided into multiple modules); likewise, 'hubs' are network elements (nodes with a number of links/edges that greatly exceeds the average) and 'hub emergence' (networks that reflect the characteristic of contain multiple highly linked hubs).

Introduction: starting @ line 148 - "Our experimental system is an agricultural field....Compared to previous studies, our system is simpler because it has just one plant genotype, which is grown in synchrony...Our identification of bacteria and fungi by DNA sequence is more precise...." Etc.... rather than directly comparing the work carried out here to previous studies, it might be more preferable to simply state the strengths of this study (the relative improvement over earlier work should already be clear from justifications provided in previous chapters within the Introduction), consider "Here we use modern high-throughput sequencing techniques to examine interactions of microbial communities, bacterial and fungal, associated with leaves, roots, rhizosphere, and surrounding soils of two sorghum cultivars planted as a monocultures in agricultural fields during a period of drought. This experimental system allowed us to investigate resistance and resilience of these microbial communities under the stress of drought and subsequent recovery after watering...etc."

>>Questions related to approach, interpretation, and statistics used:

Ecological concepts: The authors state, "We use definitions of ecological resistance as the change



in compositional dissimilarity in response to stress and of ecological resilience as the recovery in compositional dissimilarity when stress is relieved. Ecological resistance and resilience are determined by comparing compositional dissimilarity among communities within treatments (combined control and stress) with dissimilarity between control and stress communities. Specifically, resistance is  $1-R_2$  using control and droughted communities and resilience is  $1-R_2$  using control and rewetted communities, in which  $R_2$  was determined by permutational analysis of variance (permanova 40)." The authors should directly cite works influencing the definitions here, for example the referenced paper Shade et al. 2012 provides excellent discussion over the concepts of resistance and resilience as well as related terminology. These authors state, "Disturbance and community stability are necessarily related, as stability is defined as a community's response to disturbance (Rykiel, 1985). Here, we adopt definitions most similar to Pimm (1984), in which stability is comprised of resistance and resilience (Table 1), two quantifiable metrics that are useful for comparing community disturbance responses and have precedent in the microbial ecology literature (e.g., Allison and Martiny, 2008). ... Here, resistance is defined as the degree to which a community is insensitive to a disturbance, and resilience is the rate at which a community returns to a pre-disturbance condition (Pimm, 1984)." These authors further define the related 'Stable state' as, "A condition where a community returns to its original composition or function following disturbance." As the ms authors base their analyses on Bray-Curtis dissimilarity, it should be noted that here a value of 0 means two sites that have the same community composition (they share the same species at the same levels of abundance), whereas a value of 1 denotes two communities that are completely dissimilar (i.e., they do not have species in common). Given this, could resilience, for example, be better defined as "the recovery in compositional similarity (i.e., Bray-Curtis dissimilarity values converging on zero)." Such a definition would have bearing, for example, on the interpretation of Figure 1. Further, this figure also stresses the reliance on the R-squared value (inversely proportional to the effect strength) in interpreting resistance or resilience, yet the generally low  $R_2$  here suggests very little variation in distances is explained by the groupings - are we to believe that this means (inversely) very strong resistance or resilience effects? Further, p-values in Permanova type are strongly influenced by sample size, was this accounted for in the analysis (similarly see comments regarding FDR below). Some of these issues need to be cleared up.

Network analysis: When running numerous parallel correlations, as are possible with metabarcoding sequence data, the chance of recovering spurious significant positive correlations are greatly enhanced. There are statistical methods, such as FDR (false discovery rate), that can be used to reduce the influence of false positives. This may be especially true for non-parametric approaches (i.e., Spearman's ranked correlation). Corrective measures (i.e., FDR), may be warranted here to reduce type I errors.

Guild approach: The authors also use a fungal guild concept in their network analyses, while these concepts appear to be derived from the paper below, yet the authors do not directly cite this paper/source/software and should (especially in the methods):

Nguyen NH, Song Z, Bates ST, Branco S, Tedersoo L, Menke J, Schilling JS, Kennedy PG. 2016. FUNGuild: an open annotation tool for parsing fungal community datasets by ecological guild. *Fungal Ecology* 20:241-248.

Further, care should also be taken when interpreting the network analysis results. For example, the authors claim that "co-occurrence networks among functional guilds of rhizosphere fungi ... were dramatically strengthened by pre-flowering drought", yet Figure 2B shows that the "strengthened" network contains numerous saprotrophs and plant pathogens, suggesting that "pre-flowering drought" contributed to decay (perhaps of dead plant matter) and disease.

Also see comments above regarding potential overreaching statements.

Examples of other issues:

Introduction: starting @ line 153 - "seedling emergence to fruit maturation" ... as sorghum is a member of the Poaceae (i.e., a grass) the seed (e.g., millet) of sorghum is typically referred to as a cereal grain rather than a "fruit".

Results: starting @ line 165 - "As noted above, the simple fact that fungi grow more slowly than bacteria...." I don't feel that this is a simple matter, bacteria "grow" as single-celled microorganisms through binary fission where, yes, doubling times can range in 10s of mins. Growth for fungi is something completely different; a (sometimes massive) multicellular (generally) mass of hyphae (a mycelium) that grows by extension at the hyphal tip (unless we are talking about yeasts), where some taxa (e.g., *Neurospora*) can have relatively high growth rates (e.g., several mm per hour) at the hyphal tip. Therefore, a reductionist approach to growth rates is likely not warranted here.

Results: paragraph @ lines 165-179 - There are no results given here, this paragraphs has elements that may be more appropriate for the Methods section.

### **Reviewer #3 (Remarks to the Author):**

In this manuscript, the authors report the effect of pre-flowering drought, post-flowering drought, and recovery after pre-flowering drought on fungal and bacterial communities and networks in/on roots, rhizosphere soil, bulk soil, and leaves of field-grown sorghum. They hypothesise, based on previous work, that fungal communities and network are more resistant but less resilient than those of bacteria. They test these hypotheses using previously published data for new analyses. They find that their hypothesis that fungal communities are more resistant and less resilient than bacterial communities is supported. Using all correlations between bacteria and fungi in the four compartments, they find that the frequency of positive correlations increased in pre-flowering drought, but using only significant positive correlations (ie co-occurrence networks), they find that pre-flowering drought disrupts networks in roots, rhizosphere and soil but increases their connectivity on leaves. Re-watering resulted in networks resembling control networks again, except for the network in soil (but note that I inferred those results myself from Fig. 3 as I found the description of the results hard to follow). They conclude that understanding microbial network response to stress might inform manipulating microbial communities for increased plant tolerance to stress in agricultural settings.

I enjoyed reading this mostly clearly written manuscript that addresses interesting hypotheses. However, I found the amount of results presented quite overwhelming and not always easy to follow/ interpret. The hypotheses stated are quite abstract and informed entirely by previous work on soil fungal and bacterial communities and network responses to drought, and in that sense the paper reads as largely confirmatory and leans heavily on the results from a few recent papers. I also feel that there is really a severe lack of context on why we want to understand how the communities/ networks in these different plant compartments respond to drought. To me, it would be much more interesting to focus in on the differences between these compartments. What drives the assembly of fungal and bacterial communities on leaves, and how is this different from those in roots and in soil? What would be the implications for their functioning and for plant health of the changes in these communities in response to drought? I am missing all of this in the manuscript, other than quite vague and general statements. I would suggest to focus on this, and I would also suggest ditching the post-flowering drought treatment, as there is no recovery phase after this drought, which makes it difficult to compare these data to the pre-flowering drought.

Moreover, while the manuscript focusses on networks, never is the reliability of these correlations and whether they actually represent interactions between microbes discussed. Positive correlations between microbes can simply indicate niche sharing or responding to the same drivers. Moreover, it is not clear which OTUs were used for correlations (all? Or the ones that occurred over a certain number of experimental units? Or the most abundant ones?), and on how many observations these correlations are based. From the methods it seems that there were 6 replicates of each treatment – does this mean that correlations were based on only 6 data points? Then I would seriously question the robustness of the resulting networks.

In addition, while on close inspection the analyses seem robust and the results are mostly correctly interpreted, I found the figures quite hard to understand as the axes and legends are

rather ambiguous. The clarity can be improved, and perhaps also the presentation, because as I said above the amount of data is overwhelming.

More detailed comments:

L 164: yes, but also because of their hyphal growth form and thick cell walls, see Schimel et al. 2007 Ecology and Guhr et al. 2015 PNAS.

L 175-184 and Figure 1: I found this section very hard to follow. Here, it says that resistance and resilience are calculated as  $1-R_2$ , but in the figure Bray-Curtis dissimilarities are reported (are similarities? This is not clear), and in the figure legend it says resistance and resilience. I am lost. It's also not immediately clear what is meant by inter-group and intra-group.

L 205: can you be more specific? Which compartments?

L 238-244: I found this section very hard to read, as pretty much every sentence mentions that vertices are dropped and rise, but in response to what and compared to what? I assume to drought, but this is never explicitly mentioned.

L 252: The biotic interactions become even more complex than the control after rewatering. But is this resilience? Resilience means that the disturbed treatment is approaching or resembling the control.

L 315-318: I don't understand this sentence

L 325: not just in leaf in post-flowering drought, also in soil and root

L 324: De Vries et al. 2018 Nat Comms also analysed combined bacterial-fungal networks – this is detailed in their supplementary material

L 327-330: this sentence makes no sense to me. Hypotheses developed from one type of analysis? I would think that it is not about the analysis but about the concept. The analysis is just a means to test a hypothesis.

L330-331: again, I have no idea what is meant here. Whole communities hide variation based on compartments?

L332-334: I think it is rather stark to make inferences about applications in agriculture from these theoretical hypotheses

Methods: I understand that these are previously published data but there's really more detail needed here. How large were the plots? What was the experimental layout? How were samples collected? What other analyses were done? Were there six replicates per treatment, and does this mean that correlations for network analyses were done only using 6 datapoints....?

#### **Reviewer #4 (Remarks to the Author):**

Cheng Gao and colleagues in their manuscript 'Resistance and Resilience in Microbes: Co-occurrence Networks Delve Deeper Than Community Composition' address two fundamental questions in the field of microbial community compositions: Resistance and resilience. To do so, they combine two very comprehensive previously published datasets analysing microbial communities on crop plants under extreme drought conditions and irrigation. The datasets are based on 16S and ITS amplicon sequencing and the analyses in the paper is primarily based on pairwise correlations of these datasets.

Particularly the question if fungi are more resistant H1 but less resilient H2 than bacteria is certainly a key question in the field and addressed in depth in this manuscript. Besides direct analyses of correlation data, the authors use networks to get deeper insights into community structures. They identify a disruption of communities by drought and see an increase of positive correlations among bacteria, fungi and across kingdoms correlating bacteria and fungi. In combination with network analyses, this gives support for the stress gradient hypothesis. Based on their analyses, they can further underpin the importance of mycorrhiza fungi in stabilizing communities under drought.

In summary, the paper touches a very timely and relevant field and the authors show convincingly that their dataset can be used to infer their central hypothesis H1 and H2. Although I think this manuscript has great potential it would certainly benefit from more details and by addressing some of the following points:

1. As the authors state, key to the paper are pairwise correlations. The authors focus, however, only on Spearman's Rho or Spearman's rank-order correlation. This assumes a monotonic relationship. From the paper it is not clear if the authors have analyzed other correlations to show that this fits the best or have plotted the data to see if this really fits for all samples. Why not using Spearman's correlation, particularly for the networks this might be a better choice or a combination?
2. Further to the correlation analyses: How valid is it to correlate 16S and ITS data together to make conclusions about robustness and resilience? Both will result in completely different resolution. ITS is used to resolve on a species level, 16S will rarely branch that deep. Wouldn't it be better to compare 16S and 18S? Is it possible that bacteria are more resilient because of less resolution, meaning other bacteria move in following rewetting but they are seen as having the same 16S sequence while fungi move back in that show the same taxonomic distance but can be resolved?
3. Very much depends on the calculation of the networks. From the methods I can see igraph has been used and the implemented calculation of networks. To better understand the quality and robustness of the networks it certainly needs more information on the calculation. For example, how was sparsity addressed and how density of the networks. Based on the figures, density is a particular issue, as very dense networks are compared to extremely sparse networks. I would suggest to use at least one other method to calculate the networks correcting for abundance and sparsity or not correcting and comparing those to each other. In my opinion this is relevant to identify if modularity is robust, as this has been debated a lot.
4. As far as I understand from the data sets, the samples are not independent from each other but have a time factor: PRE-Drought, PRE-Rewatering, POST-Drought. To analyze stability it would be useful to track vertices over time and compare PRE and POST networks directly. Particularly positional stability of each vertex would be a good additional measure when comparing different network calculations.
5. A minor thing but relevant to understand what has been done: What are the Guilds and how have they been calculated? I guess this is based on Nguyen et al 2016 but I could not find any information.
6. Question concerning the experimental layout: The experiments have been set up in an area with extremely low precipitation. So any microbe in the soil would be adapted to cope with drought. In this case I would assume that regular irrigation is a perturbation to the community and not drought. Have samples been taken before the planting that could be compared? Is the drought state perhaps a communal 'recovery'?

1 **Response to reviews.**

2

3 **Resistance and Resilience in Microbes: Co-occurrence Networks Delve Deeper Than**  
4 **Community Composition**

5 Cheng Gao<sup>1,2,9\*</sup>, Ling Xu<sup>2,3,9</sup>, Liliam Montoya<sup>2</sup>, Mary Madera<sup>2</sup>, Joy Hollingsworth<sup>4</sup>, Liang Chen<sup>5</sup>,  
6 Elizabeth Purdom<sup>6</sup>, Vasanth Singan<sup>7</sup>, John Vogel<sup>2,7</sup>, Robert B. Huttmacher<sup>8</sup>, Jeffery A. Dahlberg<sup>4</sup>,  
7 Devin Coleman-Derr<sup>2,3</sup>, Peggy G. Lemaux<sup>2</sup>, John W. Taylor<sup>2\*</sup>

8 We begin with responses to seven general concerns and then move to the comments of  
9 individual reviewers. To reduce redundancy, where individual reviewers reiterated the general  
10 concern, we refer the reader back to our response to the general concern.

11

12 **GENERAL CONCERN 1 - Alternative analyses to account for different taxonomic resolution of**  
13 **16S and ITS data (Reviewer 4).**

14

15 **Response: We, too, share reviewer #4's concern that 16S and ITS identify bacteria and fungi at**  
16 **different levels of taxonomic resolution (Bruns & Taylor 2016 Science). Ideally, we would deepen**  
17 **the level of taxonomic resolution for bacteria to the species level. However, we (and all other**  
18 **researchers) are limited at the present to 16S rRNA (about the family level or higher) for**  
19 **characterizing bacterial communities.**

20

21 **To address the reviewer's concern about the different resolution of 16S and ITS, we compared**  
22 **bacterial 16S OTUs against both fungal communities recognized by ITS OTUs as well as fungal**  
23 **communities recognized at the family level (roughly the taxonomic level determined by 18S**  
24 **rDNA). The results of analyses using either fungal families or OTUs are consistent. Out of total 36**  
25 **comparisons (15 root, 15 rhizosphere and 6 soil), different family and OTUs results were detected**  
26 **in four instances. In two of these, significances detected by OTUs were not detected by family**  
27 **(root, week 4 and 17) and, in the other two cases, significances detected by family were not**  
28 **detected by OTUs (rhizosphere, weeks 7 and 8). In our revised manuscript we report only results**  
29 **that are consistent in both analyses. Importantly, our key findings that fungi are (i) more resistant**  
30 **than bacteria to drought stress but (ii) less resilient than bacteria when the stress is relieved by**  
31 **rewetting are unaffected by this change because of the 23 significant comparisons supported by**  
32 **both analyses from weeks 5 and 9-16 in root and weeks 4-6 and 11-17 in rhizosphere.**

33

34 **Revised figure:**

35

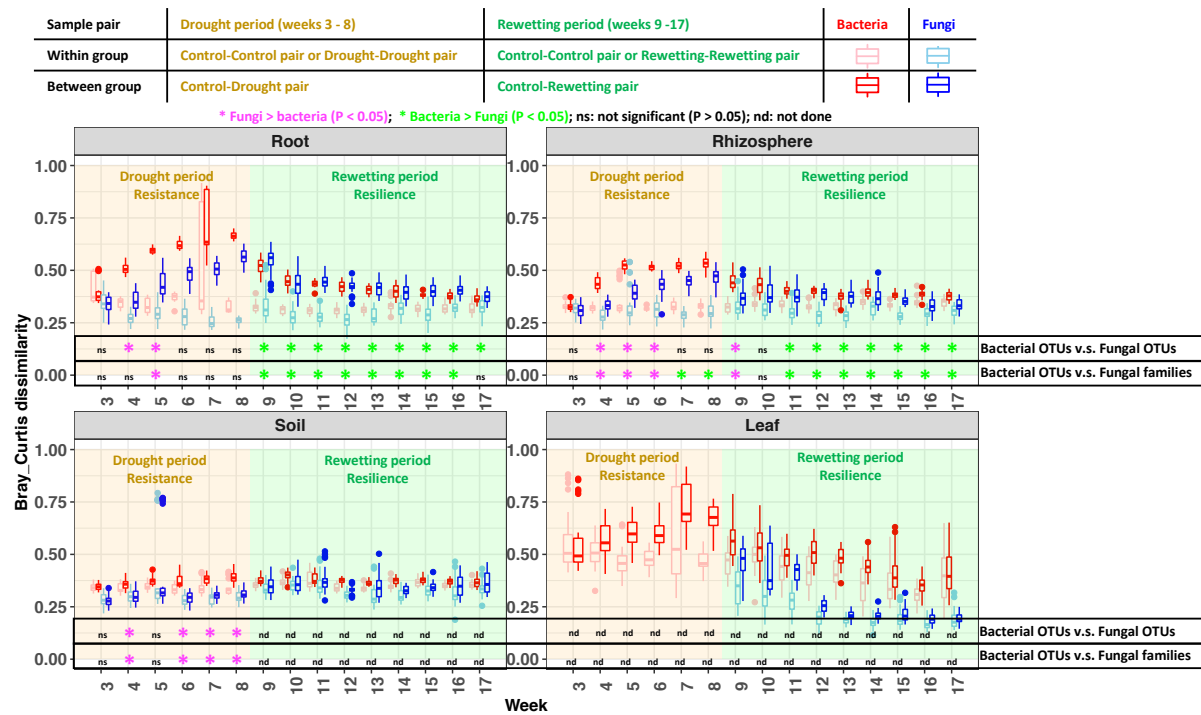

36  
37

38 **Fig. 1. Resistance and resilience of bacterial and fungal community composition.**

39 Ecological resistance to drought stress is detected by comparing compositional dissimilarity of  
 40 between-group pairs (control-drought pairs) against within-group pairs (control-control pairs and  
 41 drought-drought pairs) at each of the droughted weeks (weeks 3 - 8). Ecological resilience to  
 42 rewetting is detected by assessing, from before to after rewetting, the change in the difference  
 43 of compositional dissimilarity between within-group pairs and between-group pairs. Here, the  
 44 point just before rewetting was week 8 and the points after rewetting were weeks 9 - 17. To  
 45 account for the different resolution of ITS and 16S, we compared bacterial 16S OTUs against both  
 46 fungal ITS OTUs as well as fungal families. In 32 of 36 cases, the results of fungal families and  
 47 OTUs are consistent. Different family and OTUs results were detected in two cases where  
 48 significances detected by OTUs were not detected by family (root, week 4 and 17), and in two  
 49 cases where significances detected by family were not detected by OTUs (rhizosphere, weeks 7  
 50 and 8). We report only results that are robust across these two conditions. Significantly higher  
 51 resistance to drought of fungi than bacteria was detected in root (week 5), rhizosphere (weeks 4  
 52 - 6) and soil (weeks 4, 6 - 8). Significantly higher resilience to rewetting of bacteria than fungi  
 53 was detected in root (weeks 9 - 16) and rhizosphere (weeks 11 - 17). Note that fungi exhibited  
 54 stronger resilience than bacteria at the first week of rewetting (week 9). The finding that fungal  
 55 community composition in soil is not shaped by drought prevented us from further detecting  
 56 resilience in this compartment. Note that fungal communities in early leaves are excluded from  
 57 analysis due to the high proportion of non-fungal sequencing reads. The detailed results at fungal  
 58 family levels can be found in Fig. S1.

59  
60  
61

GENERAL CONCERN 2 – additional network analyses (Reviewers 2 and 4),

62

63 Response: In addition to the Spearman method of network analysis used in our original  
64 manuscript, we added network analyses using the Pearson correlation method and the CoDa  
65 method of Gloor et al. 2017. In almost all cases, the results of these three different methods are  
66 consistent.

67

68 We present the results of the Spearman analysis in the manuscript (Figs. 2, S3), because the  
69 Spearman method is widely used in ecological research (e.g., de Vries et al 2018 Nat Commun).  
70 We also present the results using the Pearson and CoDa approaches as supplementary  
71 information (Fig. S14, S15).

72

73 Our first conclusion, that drought in general disrupts microbial networks, was found in 11 of 13  
74 Spearman networks, 10 of 13 CoDa networks, and 9 of 13 of Pearson networks. The two out of  
75 13 cases where the Spearman result was not supported by other methods are: i) The BF network  
76 in rhizosphere was judged to be disrupted by drought using the Spearman and CoDa methods  
77 but was found to be enhanced by drought using the Pearson method; and ii) The FF network in  
78 soil was judged to be disrupted by drought using the Spearman method but was judged to be  
79 unchanged by the Pearson and CoDa methods.

80

81 Neither did these new analyses have any effect our second conclusion, that co-occurrence  
82 networks among functional guilds of rhizosphere fungi and leaf bacteria were dramatically  
83 strengthened by drought, because these same results are found in all the three methods.

84

85 Importantly, all three methods support the key findings that: (i) *In general, drought disrupts*  
86 *microbial networks based on significant positive correlations among bacteria, among fungi and*  
87 *between bacteria and fungi. (ii) In contrast, co-occurrence networks among functional guilds of*  
88 *rhizosphere fungi and leaf bacteria were dramatically strengthened by drought.*

89

90 Revised and added figures:

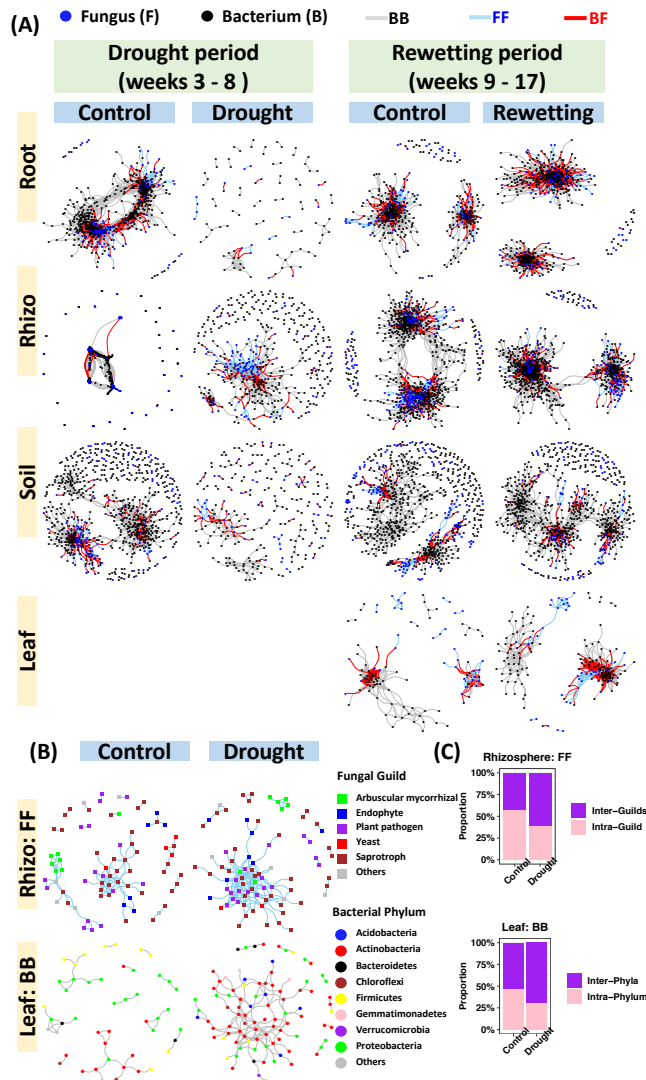

91  
 92 **Fig. 3 Networks of significant positive cross-taxonomic group correlations (bacteria and fungi).**  
 93 (A) Fungal OTUs (blue) and bacterial OTUs (black) are graphed as nodes. Significant positive  
 94 Spearman correlations are graphed as edges ( $Rho > 0.6$ ,  $FDR P < 0.05$ ); Skyblue (fungus-fungus),  
 95 grey (bacterium-bacterium) and red (bacterium-fungus). All three types of co-occurrences (BB,  
 96 FF and BF) are generally disrupted by drought (but not FF in rhizosphere and BB in leaf, see Fig  
 97 S3), and recovered by rewetting. (B-C) FF co-occurrences in rhizosphere and BB co-occurrences  
 98 in leaf are drastically enhanced by drought, which is coupled with the increase of the proportion  
 99 of interaction between fungal guilds and the increase of the proportion of interaction between  
 100 bacterial phyla. The key finding that drought enhanced the rhizosphere fungal network and the  
 101 leaf bacterial network was also supported by the Pearson method and CoDa methods (Figures  
 102 S14 and S15).  
 103



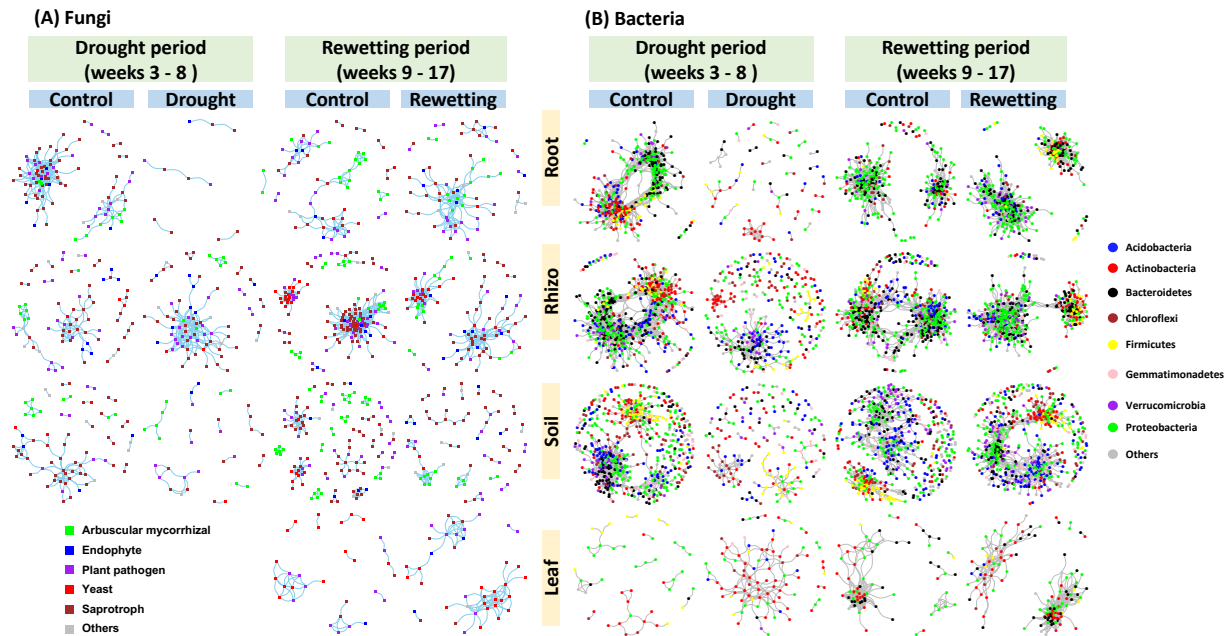

104  
 105 **Fig. S3 Subnetworks of significant positive Spearman correlations (A) between fungal taxa and**  
 106 **(B) between bacterial taxa.** (A) Subnetworks of significant positive correlations between fungal  
 107 OTUs. The FF co-occurrence in rhizosphere is drastically enhanced by drought, although it is  
 108 strongly disrupted in root. Re-watering caused recovery of the FF network, with  
 109 overcompensation in root and a lag in rhizosphere and soil. (B) **Subnetworks of significant**  
 110 **correlations between bacterial OTUs.** The BB co-occurrence in leaf is drastically enhanced by  
 111 drought, although it is strongly disrupted in root, rhizosphere and soil. Re-watering caused  
 112 recovery of the BB network.

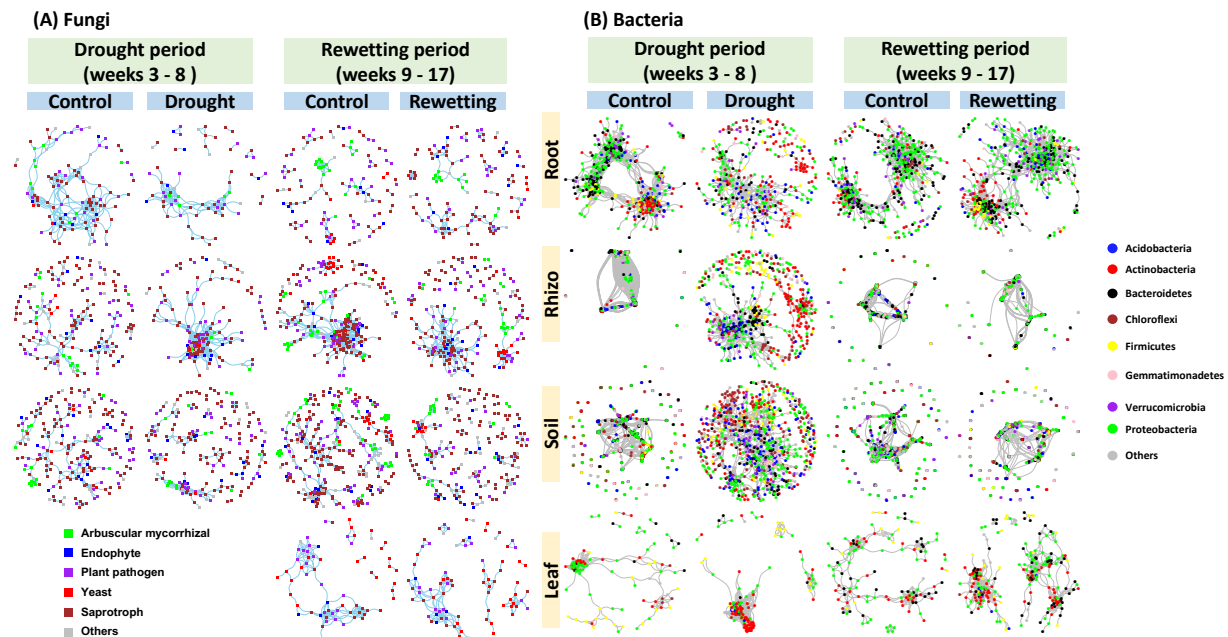

113  
 114 **Fig. S14 Co-occurrence network using the Pearson method.** (A) The fungal co-occurrence  
 115 network in rhizosphere is drastically enhanced by drought, although it is strongly disrupted in  
 116 root. (B) The bacterial co-occurrence network in leaf is drastically enhanced by drought, although

117 it is strongly disrupted in root, rhizosphere and soil. Rewetting caused recovery of both fungal  
 118 and bacterial networks.  
 119

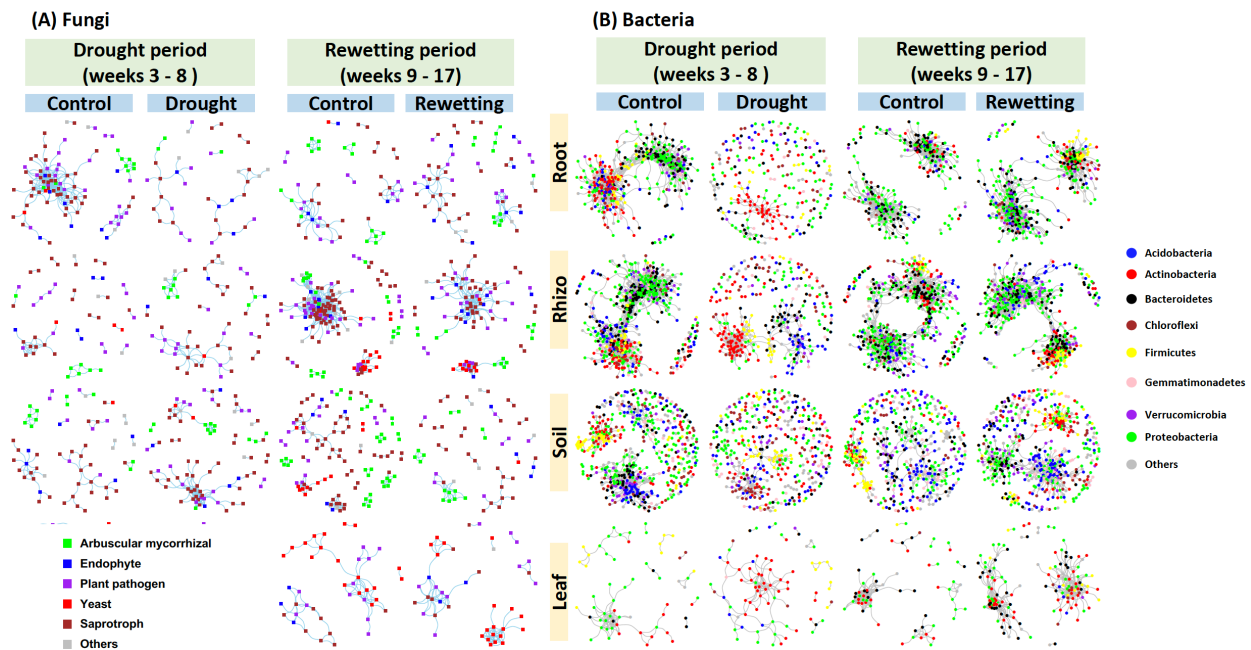

120  
 121 **Fig. S15 Co-occurrence network using the CoDa method.** (A) The fungal co-occurrence network  
 122 in rhizosphere is enhanced by drought, although it is strongly disrupted in root. (B) The bacterial  
 123 co-occurrence network in leaf is drastically enhanced by drought, although it is strongly disrupted  
 124 in root, rhizosphere and soil. Rewetting caused recovery of both fungal and bacterial networks.  
 125  
 126

127 GENERAL CONCERN 3 - correcting p-values for multiple comparisons if not done so  
 128 (Reviewers 1 and 2),  
 129

130 **Response:** We now correct p-values using the FDR method. Our key findings were not changed  
 131 by the FDR correction of p values. We have provided this information in our revised ms.  
 132

133 **Revised:** To test  $H_1$  and  $H_2$  at the co-occurrence level, the above-mentioned Spearman  
 134 correlations were retained where  $Rho > 0.6$  and  $P < 0.05$ ; the P value having been adjusted using  
 135 the FDR method.  
 136

137 GENERAL CONCERN 4 - providing more information on the methods (all Reviewers, e.g. see  
 138 Reviewer 3's comment on sample size)  
 139

140 **Response:** We added information about methods and clarified the number of samples in the  
 141 analysis.  
 142

143 **Added text:** We analyzed networks for each period and treatment separately. Thus, the drought-  
 144 period network was based on 36 communities (6 plots \* 6 time points) and the rewetting period

145 network was based on 48 communities (6 plots \* 8 time points). In each of these analyses, we  
 146 only used taxa that occurred in at least 8 communities, following Shi et al (Shi et al. 2016) and de  
 147 Vries et al (de Vries et al. 2018).

148  
 149

150 GENERAL CONCERN 5 - . . . and toning down the interpretation of co-occurrence as evidence  
 151 of interactions (all Reviewers).

152

153 **Response: We have toned-down the interpretation of co-occurrence as evidence of interactions.**

154

155 Added text: We note that correlation does not necessarily equate with interaction, but also can  
 156 be ascribed to habitat-filtering, niche sharing or dispersal limitation (Goberna et al. 2019). As is  
 157 the case with most field-based experimental designs, it is not possible to assess the effect of  
 158 habitat filtering and niche sharing. However, we can note that the role of dispersal limitation on  
 159 the co-occurrence network is weak. Based on our implementation of a taxon-taxon-space  
 160 association approach, the percentage of network links related to spatial distance was no more  
 161 than three percent (0 – 2.94 %; Figure S13). This result echos the absence of a significant  
 162 relationship between spatial distance and dissimilarity of microbial community composition  
 163 reported in our previous study (Gao et al. 2020). Thus, dispersal limitation is not likely the driver  
 164 of microbial interaction and community composition in our small research site (~480m<sup>2</sup>), which  
 165 has been cultivated for nearly six decades and was planted to one crop (sorghum) throughout  
 166 our study (Gao et al. 2020).

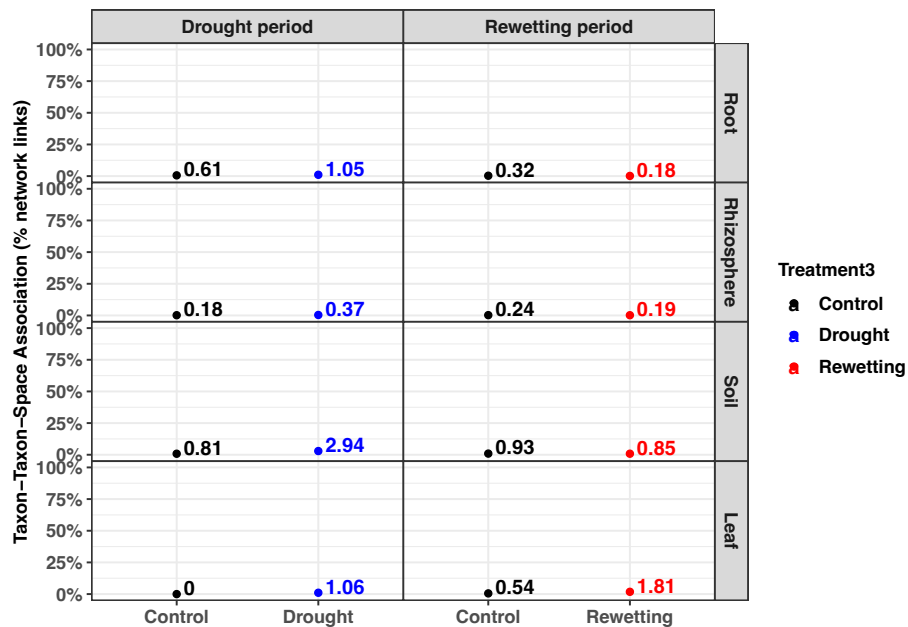

167

168 **Fig. S13 Proportion of taxon-taxon associations related to dispersal limitation.** For each of taxon  
 169 (A) -taxon (B) pair in the co-occurrence network, dispersal limitation was regarded as the driver  
 170 if both taxa showed significant correlation with spatial distance.

171

172 Please refer to the full reports below for details. Without substantial revisions, we will be unlikely  
173 to send the paper back to review.

174

175 Additionally, another reviewer who did not provide a full report raised a potential concern on the  
176 public sorghum drought data that may have been included in the analysis, namely low quality  
177 scores of some of the deposited sorghum data. This point should also be addressed.

178

179 GENERAL CONCERN 6 - low quality scores of some of the deposited sorghum data.

180

181 Response: We have found a high proportion of non-specific amplification in fungal data of early  
182 leaf samples. We removed these data when making this revision of the manuscript. Because none  
183 of the results concerning these data are key findings of our report, we no longer report that: i)  
184 early leaf fungal community composition was not affected by pre-flowering drought; ii) early leaf  
185 fungal correlations was not affected by drought; and iii) early leaf fungal network was not  
186 changed by drought.

187

188 Added text: The proportion of fungal reads was low in early leaves (weeks 1- 8) due to non-  
189 specific amplification (Gao et al. 2020), so we excluded these fungal data from our analyses.

190

191 If you feel that you are able to comprehensively address the reviewers' concerns, please provide  
192 a point-by-point response to these comments along with your revision. Please show all changes  
193 in the manuscript text file with track changes or colour highlighting. If you are unable to address  
194 specific reviewer requests or find any points invalid, please explain why in the point-by-point  
195 response.

196

197 GENERAL CONCERN 7 – Determination of resistance (1-R<sup>2</sup>) and resilience (as 1-R) from  
198 community composition (although this concern was not among those listed by the editor, it was  
199 raised by more than one reviewer).

200

201 Response: Reviewer's note confusion caused by our usage of 1-R<sup>2</sup>. Now we directly calculate  
202 resistance and resilience following the methods of Shade et al 2012 and have removed the text  
203 about 1-R<sup>2</sup> throughout our manuscript. As a result of this change, we now use a t-test to assess  
204 significance in the differences in resistance and resilience between fungal and bacterial  
205 communities. (note that revised Figure 1 addresses both General Concerns 1 and 7).

206

207 Importantly, our key findings are unaffected by this new analysis. As before, fungi being more  
208 resistant to drought stress was supported at week 5 in root, weeks 4-6 in rhizosphere and weeks  
209 4, 6-8 in soil, while fungi being less resilient than bacteria when drought stress is relieved by  
210 rewetting was supported at weeks 9-16 in root and weeks 11-17 in rhizosphere.

211

212 Added text: We followed the approach of Shade et al. (Shade et al. 2012) to detect resistance  
213 and resilience, which had been developed for univariate variables, e.g., richness. For multivariate  
214 data, e.g., community composition, we modified it by calculating pairwise community

215 dissimilarity for two groups: within-group (control-control pair, drought-drought pair, or  
216 rewetting-rewetting pairs), and between-group (control-drought pairs, or control-rewetting  
217 pairs). Ecological resistance to drought stress is detected by comparing compositional  
218 dissimilarity of between-group pairs (control-drought pairs) against within-group pairs (control-  
219 control pairs and drought-drought pairs) for each of the droughted weeks (weeks 3 - 8). Ecological  
220 resilience to rewetting is detected by assessing, from before to after rewetting, the change in the  
221 difference of compositional dissimilarity between within-group pairs and between-group pairs.  
222 Here, the point just before rewetting was week 8 and the points after rewetting were weeks 9 -  
223 17. A t-test was used to assess the statistical significance of the differences in resistance or  
224 resilience between bacterial and fungal communities at each time point for each compartment.  
225 To account for the different resolution of ITS and 16S, we compared bacterial 16S OTUs against  
226 both fungal ITS, species-level OTUs as well the fungal family level (Fig. S1). The results of analyses  
227 using either fungal families or OTUs are consistent. Out of total 36 comparisons (15 root, 15  
228 rhizosphere and 6 soil), different family and OTUs results were detected in four instances. In two  
229 of these, significances detected by OTUs were not detected by family (root, week 4 and 17) and,  
230 in the other two cases, significances detected by family were not detected by OTUs (rhizosphere,  
231 weeks 7 and 8). (Fig. 1). We report only results that are consistent at both the species and family  
232 levels (Fig. 1).

233 In line with our first hypothesis,  $H_1$ , we found that the resistance to drought stress for  
234 fungal mycobiomes was consistently stronger than that for bacterial microbiomes for weeks 5 in  
235 root, weeks 4 – 6 in rhizosphere, and weeks 4 and 6 – 8 in rhizosphere (Fig. 1, S1). In support of  
236 our second hypothesis,  $H_2$ , when the stress of pre-flowering drought was relieved by rewetting,  
237 we found that the resilience for the bacterial communities was consistently higher than that for  
238 the fungi in weeks 9 – 16 in root, and weeks 11 – 17 in rhizosphere (Fig. 1, S1).

239 Surprisingly, we found that resilience was stronger for fungal than bacterial communities  
240 in the first week (week 9) of rewetting in rhizosphere (Fig. 1, S1). This high resilience of fungi may  
241 be associated with the quick growth of sorghum roots when rewetted. The rhizosphere zone  
242 around these newly formed roots may be quickly colonized by soil fungi, a community that was  
243 weakly affected by drought. This result suggests that re-assembly of rhizosphere microbial  
244 community is more complex than previously expected.

245 The finding that fungal community composition in soil is not shaped by drought prevented  
246 us from further detecting resilience (Fig. 1). Note fungal community in early leaves was excluded  
247 from analysis due to the high proportion of non-fungal reads in sequencing (Gao et al. 2020).  
248

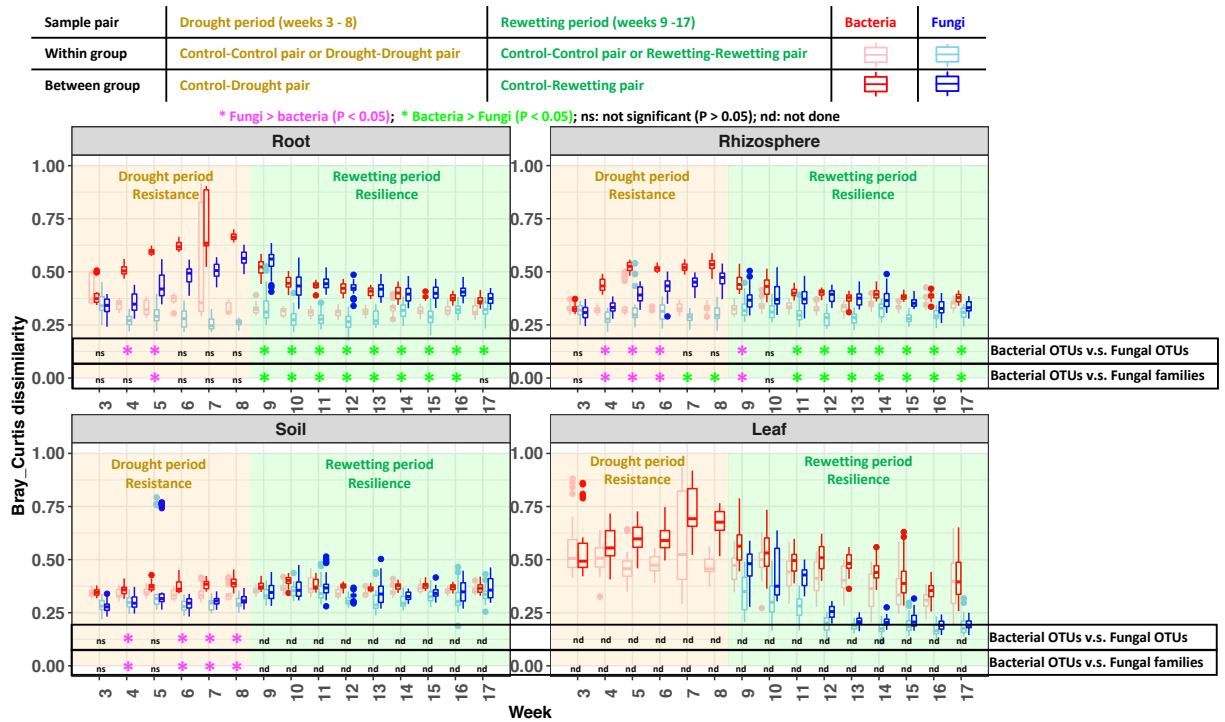

249  
250  
251  
252  
253  
254  
255  
256  
257  
258  
259  
260  
261  
262  
263  
264  
265  
266  
267  
268  
269  
270

**Fig. 1. Resistance and resilience of bacterial and fungal community composition.**

Ecological resistance to drought stress is detected by comparing compositional dissimilarity of between-group pairs (control-drought pairs) against within-group pairs (control-control pairs and drought-drought pairs) at each of the droughted weeks (weeks 3 - 8). Ecological resilience to rewetting is detected by assessing, from before to after rewetting, the change in the difference of compositional dissimilarity between within-group pairs and between-group pairs. Here, the point just before rewetting was week 8 and the points after rewetting were weeks 9 - 17. To account for the different resolution of ITS and 16S, we compared bacterial 16S OTUs against both fungal ITS OTUs as well as fungal families. In 32 of 36 cases, the results of fungal families and OTUs are consistent. Different family and OTUs results were detected in two cases where significances detected by OTUs were not detected by family (root, week 4 and 17), and in two cases where significances detected by family were not detected by OTUs (rhizosphere, weeks 7 and 8). We report only results that are robust across these two conditions. Significantly higher resistance to drought of fungi than bacteria was detected in root (week 5), rhizosphere (weeks 4 - 6) and soil (weeks 4, 6 - 8). Significantly higher resilience to rewetting of bacteria than fungi was detected in root (weeks 9 - 16) and rhizosphere (weeks 11 - 17). Note that fungi exhibited stronger resilience than bacteria at the first week of rewetting (week 9). The finding that fungal community composition in soil is not shaped by drought prevented us from further detecting resilience in this compartment. Note that fungal communities in early leaves are excluded from analysis due to the high proportion of non-fungal sequencing reads. The detailed results at fungal family levels can be found in Fig. S1.



271

272 We feel that we have addressed all the reviewer's general concerns. Below, we provide our  
273 responses to specific comments and have incorporated our responses into our revised  
274 manuscript, using track changes.

275

276 **<b>Reviewer #1 (Remarks to the Author):</b>**

277

278 This study investigated the resilience and resistance of Sorghum-associated bacterial and fungal  
279 communities against drought. The strength of the study for me is that it targeted both bacteria  
280 and fungi and studies these communities in all relevant soil and plant compartments (soil,  
281 rhizosphere and leaf). The authors rightly point out that most studies have focused on bacteria  
282 alone, and often on a single microbial compartment.

283 I found the study interesting and believe it will interest others in the field, as there is considerable  
284 interest in understanding resilience and resistance in microbial communities, and this study's  
285 comprehensive experimental design makes it a likely important article for those in the field.

286

287 The authors analysed and discussed positive microbial interactions and related this to resilience  
288 and resistance. As many of the studies that linked positive interactions with resilience and  
289 resistance are based on macro-ecological studies, it would be relevant to provide some context  
290 for microbial studies which also looked more specifically at positive associations in networks.  
291 There are a few studies that looked at the ratio of positive interactions in microbial networks in  
292 relation to ecological status, especially ecological succession, and the authors didn't mention  
293 these studies. I suggest including some of these studies in their discussion: e.g.  
294 10.3389/fmicb.2019.02887; 10.1038/ismej.2014.54; 10.1111/1751-7915.13487;  
295 10.3389/fmicb.2015.01200 and references therein.

296

297 *Original text:* We make use of all of these correlations to again examine  $H_1$  and  $H_2$  following the  
298 lead of several previous studies. For example, regarding drought stress, it has been proposed that  
299 positive interactions should increase in frequency under stressful conditions, a response explained  
300 by the stress gradient hypothesis (Bertness and Callaway 1994, Callaway et al. 2002, Hoek et al.  
301 2016, Velez et al. 2018, Hammarlund and Harcombe 2019, Piccardi et al. 2019).

302

303 **Response:** We appreciate the reviewer's suggestion to add information about publications on the  
304 ratio of positive associations in microbiomes. We added relevant information from the  
305 references provided by the reviewer, as well as the citations.

306

307 **Revised:** We make use of all of these correlations to again examine  $H_1$  and  $H_2$  following the lead  
308 of several previous studies. Previous studies demonstrated that the percentage of positive  
309 correlations is related to ecological factors that include succession, fertilization, and habitat (Dini-  
310 Andreote et al. 2014, Faust et al. 2015, Sun et al. 2017, Jiang et al. 2018, Farrer et al. 2019, Huang  
311 et al. 2019, Hernandez et al. 2021). Regarding drought stress, it has been proposed that positive  
312 interactions should increase in frequency under stressful conditions, a response explained by the  
313 stress gradient hypothesis (Bertness and Callaway 1994, Callaway et al. 2002, Hoek et al. 2016,  
314 Velez et al. 2018, Hammarlund and Harcombe 2019, Piccardi et al. 2019).

315

316 On a more general note, the authors take the correlations as an indication of interactions,  
317 however, correlations may derive from habitat-filtering or dispersal limitation processes, in  
318 which case, inferring resilience and resistance may be less straightforward. Indeed, this may be  
319 a possible reason for some of the results obtained by the authors which led to the rejection of  
320 some of their hypotheses. In other words, if the authors were able to remove correlations that  
321 were not due to habitat filtering, and particularly due to dispersal limitation, then the remaining  
322 correlations may support their original hypotheses. Partitioning correlations due to dispersal  
323 limitation, habitat filtering and interactions may not be possible in most cases, but for soil  
324 samples (and perhaps rhizosphere), it may be possible if the authors have the spatial coordinates  
325 for each sample (more details here: 10.1111/1755-0998.13079). At least the authors should  
326 acknowledge the issue that correlations may be due to other processes than interactions.

327 10.1111/1755-0998.13079 Incorporating phylogenetic metrics to microbial co-occurrence  
328 networks based on amplicon sequences to discern community assembly processes (Goberna et  
329 al. 2019)

330

331 **Response: we agree with the reviewer that correlation does not equate with interaction but can**  
332 **be ascribed to habitat-filtering or dispersal limitation. However, as pointed out by the reviewer,**  
333 **it is not possible to remove the effect of habitat filtering in our case. Regarding dispersal**  
334 **limitation, we used a taxon-taxon-space approach to find that only a small amount of network**  
335 **links (0 – 2.94 %) is related to spatial distance (Fig. S13). These results are consistent with our**  
336 **study in a homogenous, ploughed, one crop farmland.**

337

338 **Added text: Please see General Concern 5, above.**

339

340 In lines 176-179 the authors state that resistance is  $1-R^2$  (when comparing control and droughted  
341 communities) and resilience is  $1-R$  (when comparing control and re-wetted communities).  
342 However, in lines 180-186 (and in the figures and tables), the authors detail and discuss  $R^2$  values,  
343 rather than  $1-R^2$ . Perhaps this can be simplified? Since  $R^2$  is related to the level of change  
344 between treatments, perhaps the  $1-R^2$  definition is not needed?

345 In Figure 1 is the significance indicated in every compartment for what comparison exactly? Could  
346 the authors detail this in the legend? As the authors use the  $R^2$  as a measure of resilience and  
347 resistance, to claim for instance that “that the fungal mycobioime is more resistant than the  
348 bacterial microbiome to both pre- and post- flowering drought”, it would be important to show  
349 that these differences in  $R^2$  between bacteria and fungi are significant.

350

351 **Response: We appreciate the reviewer’s suggestion and recognize the confusion caused by the**  
352 **usage of  $1-R^2$ . Now we directly calculate resistance and resilience following the methods of Shade**  
353 **et al 2012 and have removed the text about  $1-R^2$  throughout our ms. As a result of this change,**  
354 **we now use a T test to assess significance in the differences in resistance and resilience between**  
355 **fungal and bacterial communities.**

356

357 **Added text: Please see General concern 7, above**

358



359 Other comments:

360 Line 248 "rewatered" should be re-wetted for consistency.

361 **Response: rewatered is replaced by rewetted throughout the manuscript.**

362

363 Line 258: Is network modularity determined by the number of modules detected?

364 **Response: No, the modularity is not solely determined by the number of modules, but also the**  
365 **extent to which a module is separated from the other parts of the network. We added description**  
366 **of modularity here.**

367

368 **Added: Modularity was defined as the measure of how much of the network is structured as**  
369 **cohesive subgroups of nodes (modules) in which the density of interactions was higher within**  
370 **subgroups than among subgroups.**

371

372 Line 341, what is -- for?

373 *Text in question: Limiting analyses of our resistance hypothesis H1 to networks of interactions*  
374 *that are both significant and positive, we found an outcome similar to that seen for all interactions*  
375 *– some combinations of compartment and stress showed support for H1 and others did not.*

376

377 **Revised: Signals of co-occurrence may be masked in all-correlation analyses that include**  
378 **correlations that are both positive and negative, and both nonsignificant and significant.**  
379 **However, when we limited the analyses of our resistance hypothesis H<sub>1</sub> to networks of**  
380 **correlations that are both significant and positive, we found an outcome similar to that seen for**  
381 **all correlations -- some combinations of compartment and stress showed support for H<sub>1</sub> and**  
382 **others did not.**

383

384 Lines 467-469: were the p-values corrected for multiple testing? If not, why?

385

386 **Response: We agree with the reviewer's request for correcting for multiple testing. We now**  
387 **correct p-values using the FDR method. Our key findings were not changed by the FDR correction**  
388 **of p values. We have provided this information in our revised ms.**

389

390 **Added text: Please see General Concern 3, above**

391

392 **<b>Reviewer #2 (Remarks to the Author):</b>**

393

394 The ms describes a new analysis based on the recombination of two previously published  
395 datasets that examines resistance and resilience of microbial communities (bacteria and fungi)  
396 associated with leaves, roots, rhizosphere, and surrounding soil of an agricultural crop, sorghum,  
397 subjected to drought stress. Using modern methodology (e.g., rDNA metabarcoding) the group  
398 finds that drought disrupts the plant-associated microbial communities and that co-occurrence  
399 networks among functional guilds of rhizosphere fungi and leaf bacteria were "dramatically  
400 strengthened" in the pre-flowering drought treatment. The ms frames these finding within the  
401 context of the classical stress gradient hypothesis, and also suggests that microbial 'hub' taxa

402 could be identified that might have utility as seed-taxa serving to support the microbial  
403 communities overall under drought stress expected with climate change scenarios.

404

405 While I feel that the ms represents an important contribution to the field, especially considering  
406 the cited deficits of previously published works that focus on agriculture, I feel that the ms is not  
407 yet ready for publication. I recommend a significant revision that addresses the following  
408 important issues:

409

410 >>Language awkwardness/precision/directness: I find the language of the ms to be very awkward  
411 in several sections and in some areas the language also lacks precision and also could be edited  
412 to be more straightforward. I present a few examples (primarily from the Introduction) here...

413

414 Introduction: starting @ line 57 (drought...drought/plant gene...plant genes) - "When drought  
415 curtails photosynthesis in response to drought the most profound change in plant gene  
416 transcription is the down regulation of plant genes involved in managing microbial association  
417 and this change in expression correlates with a decline in the abundances of these root-  
418 associated microbes." ... consider, "One of the most profound changes in plant transcription in  
419 response to drought is the down regulation of genes involved in managing microbial association  
420 that can result in a reduction in abundance of root-associated microbes."

421

422 **Response: we thank the reviewer for the suggested revision. However, it changed our original**  
423 **meanings in two ways. First, for the rewording "one of the most profound changes". It was the**  
424 **most profound change, that is, there was no more profound change in plant transcription in**  
425 **response to drought than the down regulation of genes involved in managing microbial**  
426 **association. Second, for 'that can result in ...', we found a correlation between those sorghum**  
427 **genes and microbial abundance, but we cannot infer the direction.**

428

429 **We realize that our previous statement was confusing, and revised it as followed:**

430

431 **Revised: There is no more profound change in plant transcription in response to drought than**  
432 **the down regulation of genes involved in managing microbial associations, and the down**  
433 **regulation correlates with a reduction in abundance of root-associated microbes.**

434

435 Introduction: starting @ line 81 - "We surveyed previous research that included both fungi and  
436 bacteria from the perspective of the community compositional response to drought and  
437 subsequent rewetting (Table S1) finding that H1 has been both supported and falsified, and H2  
438 has been either falsified or untested." ... consider, "We surveyed the literature for research that  
439 addressed community composition shifts, for both fungi and bacteria, in response to drought and  
440 subsequent rewetting (Table S1) finding that H1 has been both supported and refuted, while H2  
441 has either been refuted or remains untested."

442

443 **We agree with the reviewer and have revised our text as suggested.**

444

445 Revised text: We surveyed the literature for research that addressed community composition  
446 shifts, for both fungi and bacteria, in response to drought and subsequent rewetting (Table S1),  
447 We find that H<sub>1</sub> has been both supported (Barnard et al. 2013, de Vries et al. 2018) and refuted  
448 (de Vries and Shade 2013, McHugh et al. 2014, McHugh and Schwartz 2016), while H<sub>2</sub> has either  
449 been refuted (de Vries and Shade 2013, de Vries et al. 2018) or remains untested (Barnard et al.  
450 2013).

451  
452 Introduction: starting @ line 96 - "Here, to advance our aim of including microbe-plant  
453 interaction in efforts to combat crop loss due to drought, we test these hypotheses, H<sub>1</sub> and H<sub>2</sub>,  
454 through comparisons of microbial communities in four compartments (leaf, root, rhizosphere  
455 and soil) in fields of sorghum during these three treatments, when drought imposed prior to  
456 flowering, when this preflowering drought is relieved by watering, and when drought is imposed  
457 after flowering." ... from my reading of the methods, this study was carried out during drought  
458 conditions (i.e., it was not "imposed") in CA with crops being subjected to watering (rewetting)  
459 or not, consider, "In this study we focused on both bacterial- and fungal-plant interaction,  
460 examining hypotheses H<sub>1</sub> and H<sub>2</sub> for microbial communities associated with sorghum leaves,  
461 roots, rhizosphere, and surrounding soils in agricultural fields under drought conditions that were  
462 relieve post-flowering by watering or not." Further, while I agree that the results from this study  
463 provide insights that might be helpful in efforts to "combat crop loss", the study did not directly  
464 address "crop loss" and, therefore, statements such as this are likely a bit of an overreach.

465  
466 Response: We thank the reviewer for the suggested revision, however, it failed to capture all  
467 three treatments: 1) regular wetting throughout the season as a control, (2) pre-flowering  
468 drought followed by regular wetting at flowering, (3) regular wetting before flowering that was  
469 followed by post-flowering drought.

470  
471 Note, this point is now moot because we have followed reviewer 3's suggestion to remove the  
472 post-flowering drought treatment in this study.

473  
474 We agree that drought in our study is not imposed. We also agree to remove the statement about  
475 combat crop loss.

476  
477 Revised: Here, we examine hypotheses H<sub>1</sub> and H<sub>2</sub> for microbial communities associated with  
478 sorghum leaf, root, rhizosphere, and soil, in naturally droughted, agricultural fields experiencing  
479 two irrigation treatments, (1) regular wetting throughout the season as a control, and (2) natural,  
480 pre-flowering drought followed by regular wetting beginning at flowering.

481  
482 Introduction: starting @ line 109 (Bacteria are typically considered a Domain, while Fungi are  
483 typically considered a Kingdom) - "For example, regarding drought stress, it has been proposed  
484 that positive interactions should increase in frequency under stressful conditions, a response  
485 explained by the stress gradient hypothesis. It also has been proposed from studies of microbes  
486 on Arabidopsis leaves, roots and soil, that correlations between microbes within kingdoms tend  
487 to be positive, while correlations between kingdoms tend to be negative. Additionally, ecological  
488 modeling has indicated that negative interactions should promote stability...." ...

489  
490 consider, "For example, it has been proposed that positive microbial interactions should increase  
491 in frequency under stress scenarios, such as drought, a response explained by the stress gradient  
492 hypothesis (SGH). Further, stress studies of microbes on Arabidopsis leaves, roots, and the  
493 surrounding soils suggest that within-taxonomic group microbial interactions tend to be positive,  
494 while those between-taxonomic groups are negative. Ecological modeling also indicates...."  
495 Further, microbial interactions, which biological/ecological in nature, should not be confused  
496 with correlation, which is simply a statistical method. For example, positive correlations related  
497 to shifting microbial abundances might be interpreted as mutualist interactions (or facilitation),  
498 while negative correlations might be interpreted as antagonistic interactions (or competition).  
499 The paper tends to confuse these concepts a bit (see comments immediately above and below),  
500 and the authors should bear in mind that they are attempting to view/interpret microbial  
501 interactions through the lens of statistical correlation (e.g., correlations metrics are appropriate  
502 for the results, but the interpretation (i.e., in discussion) should focus on the interactions.

503  
504 **Response: We thank the reviewer for the suggested revision of text as well as the interpretation**  
505 **of the results regarding correlation and interaction. We accepted all these suggestion in**  
506 **preparing the revised ms.**

507  
508 **Added text: Please see General Concern 5, above.**

509  
510 Introduction: starting @ line 112 - "*Using these studies to frame hypotheses at the all-correlation*  
511 *level, for our resistance hypothesis, H1, under drought we expect an increase in the proportion of*  
512 *positive correlation most strongly for B-B, followed by F-F, and lastly by B-F correlation; and for*  
513 *our resilience hypothesis, H2, under re-watering, we expect a decrease in the proportion of*  
514 *positive correlation most strongly for B-B, followed by F-F, and lastly by B-F correlation.*" This  
515 sentence does not entirely make sense given the discussion as the proposed hypotheses are not:  
516 A) clearly defined overall; B) completely consistent with the studies mentioned; or C) differently  
517 defined for resistance vs. resilience - also, I'm not sure what phrases like "all-correlation level"  
518 mean

519  
520 ...consider, "*These previous studies provide a framework for the hypotheses we propose here,*  
521 *namely under the stress of drought, we expect enhanced facilitation within taxonomic groups (i.e.,*  
522 *positive correlations for B-B and F-F) and enhanced competition between taxonomic groups (i.e.,*  
523 *negative correlation for B-F).* Further, the hypotheses proposed by authors in the ms need to be  
524 distinguished from those of other work (i.e., those associated with SGH) and more clearly defined  
525 and consistent overall. For example, the hypotheses mentioned in the abstract focus on fungi  
526 and state that fungi are "(i) more resistant but (ii) less resilient than bacteria" (we assume this  
527 refers there respective status under the stress or drought), while the H1 and H2 mentioned here  
528 focus on interactions.

529  
530 **Response: Our hypotheses and the ways in which we evaluate them are a bit more complex than**  
531 **presented by reviewer #2.**

532

533 We test our hypotheses that “fungi are (i) more resistant but (ii) less resilient than bacteria” at  
534 three levels: a) using community composition, b) using all-correlations (we follow de Vries 2018),  
535 and c) using just correlations limited to those that are significant and positive as determined from  
536 a co-occurring network. In the part referred by reviewer #2, we focused on the test of these two  
537 hypotheses at the all-correlation level.

538  
539 Based on the stress-gradient hypothesis (stress increases frequency of positive microbial  
540 interactions), the hypothesis that fungi will be more resistant than bacteria can be extended from  
541 the community composition level to the all-correlation level. The expectation is that drought will  
542 increase the proportion of positive correlation more strongly for B-B correlations than F-F  
543 correlations. It is also possible to extend the Resilience hypothesis (Bacteria > Fungi) to the all-  
544 correlation level, i.e., rewetting will decrease the proportion of positive correlations more  
545 strongly for B-B correlations than F-F correlations.

546  
547 The original framework for evaluating resistance (Fungi > Bacteria) and resilience (Bacteria >  
548 Fungi) was limited to interactions within fungi or within bacteria and did not have expectation on  
549 the interaction between bacteria and fungi (B-F). We added these inter-domain interactions  
550 based on the results of research on *Arabidopsis* (within-taxonomic group microbial interactions  
551 tend to be positive, while those between-taxonomic groups are negative) and ecological  
552 modeling (negative interactions promote stability). In adding B-F interactions to resistance, we  
553 hypothesized that drought would increase the proportion of positive correlation more strongly  
554 for within-taxonomic group microbial interactions (B-B and F-F) than between-taxonomic groups  
555 (B-F). In adding B-F interactions to resilience, we hypothesized that rewetting would decrease  
556 the proportion of positive correlations more strongly for within-taxonomic group microbial  
557 interactions (B-B and F-F) than between-taxonomic groups (B-F).

558  
559 Putting all these items together, our resistance hypothesis is that “H<sub>1</sub>, under drought we expect  
560 an increase in the proportion of positive correlation most strongly for B-B, followed by F-F, and  
561 lastly by B-F correlation”; and our resilience hypothesis is that “under rewetting, we expect a  
562 decrease in the proportion of positive correlation most strongly for B-B, followed by F-F, and  
563 lastly by B-F correlation”

564  
565 We do not expect that “drought [would] enhance facilitation within taxonomic groups (i.e.,  
566 positive correlations for B-B and F-F) and enhance competition between taxonomic groups (i.e.,  
567 negative correlation for B-F).” Under the Stress Gradient Hypothesis, “drought [would] enhance  
568 facilitation for both within taxonomic groups and between taxonomic groups”.

569  
570 Here, we revise this paragraph to improve clarity regarding the resistance and resilience  
571 hypotheses.

572  
573 Revised: For example, it has been proposed that positive microbial interactions should increase  
574 in frequency under stress scenarios, such as drought, a response explained by the stress gradient  
575 hypothesis (SGH) (Bertness and Callaway 1994, Callaway et al. 2002, Hoek et al. 2016, Velez et al.  
576 2018, Hammarlund and Harcombe 2019, Piccardi et al. 2019). Thus, when microbial correlations

577 among and between bacteria and fungi (all-correlation, B-B, F-F, B-F) are considered, if H<sub>1</sub> (fungi  
578 are more resistant to drought stress than bacteria) is considered under the SGH, drought would  
579 be expected to increase the proportion of positive correlations more strongly for B-B correlations  
580 than F-F correlations, and if H<sub>2</sub> (fungi are less resilient to rewetting than bacteria) is similarly  
581 considered, rewetting would be expected to decrease the proportion of positive correlations  
582 more strongly for B-B correlations than F-F correlations. Although the original H<sub>1</sub> and H<sub>2</sub> were  
583 based on bacteria or fungi, by themselves, and not interaction between bacteria and fungi,  
584 interactions between bacteria and fungi were included in two more recent studies. First, stress  
585 studies of microbes on *Arabidopsis* leaves, roots, and the surrounding soils indicated that within-  
586 taxonomic group microbial interactions tended to be positive, while those between-taxonomic  
587 groups were negative (Agler et al. 2016, Duran et al. 2018). Second, ecological modeling indicated  
588 that negative interactions should promote stability of communities (Coyte et al. 2015). Therefore,  
589 using these studies to frame hypotheses focusing on all-correlations, for our resistance  
590 hypothesis, H<sub>1</sub>, under drought we expect an increase in the proportion of positive correlation  
591 most strongly for B-B, followed by F-F, and lastly by B-F correlation; and for our resilience  
592 hypothesis, H<sub>2</sub>, under rewetting, we expect a decrease in the proportion of positive correlation  
593 most strongly for B-B, followed by F-F, and lastly by B-F correlation.

594

595 Introduction: paragraph @ line 118-136 - I find this paragraph to be confusing and repetitive with  
596 respect to the hypotheses (and see above) overall, the discussion of "nonintuitive outcomes" is  
597 a bit obtuse and appears to be splitting hairs (to justify results/methods?). Also, "Simplifying  
598 matters by focusing on just the significant, positive correlations" - if a correlation is not significant  
599 then it should not be considered as a result at all; further, the paragraph above and H1/H2 stress  
600 the importance of validating negative correlations. This paragraph appears to be justification for  
601 the methods used in the co-occurrence network analysis part of the study, but the case could be  
602 more clearly and directly made (i.e., this is a common method for such analyses).

603

604 **Response: We agree with the reviewer and simplified this paragraph. We follow the approach of**  
605 **de Vries by including both significant and non-significant correlations in all-correlation analysis,**  
606 **and only significant, positive correlations in the co-occurrence network.**

607

608 *Revised: Integrating positive with negative correlations can lead to nonintuitive outcomes, for*  
609 *example, if both positive and negative interactions decrease, the sum can be positive if the*  
610 *decrease is strongest for the negative correlations. Simplifying matters by focusing on just the*  
611 *significant, positive correlations has revealed new information on co-oscillation of microbial taxa*  
612 *and the stability of communities (de Vries et al. 2018). Co-occurrence network analysis focuses*  
613 *on co-oscillation of microbial taxa in response to perturbation (de Vries et al. 2018). That is, it*  
614 *focuses on just the significant, positive interactions.*

615

616 Introduction: starting @ line 137 - The authors should note different terminology typically use in  
617 distinguishing between network element vs. network properties. For example, 'modules' are  
618 network elements (functional units of connectedness within the network) whereas 'modularity'  
619 is a network property (the characteristic of being divided into multiple modules); likewise, 'hubs'



620 are network elements (nodes with a number of links/edges that greatly exceeds the average) and  
621 'hub emergence' (networks that reflect the characteristic of contain multiple highly linked hubs).

622  
623 **Response: we agree with the reviewer and have replaced the word 'properties' with 'elements'**  
624 **Revised:** Identification of key network **elements**, such as, modules or hubs, may facilitate  
625 practical application of microbial networks to modern agriculture

626  
627 Introduction: starting @ line 148 - "Our experimental system is an agricultural field....Compared  
628 to previous studies, our system is simpler because it has just one plant genotype, which is grown  
629 in synchrony...Our identification of bacteria and fungi by DNA sequence is more precise...." Etc....  
630 rather than directly comparing the work carried out here to previous studies, it might be more  
631 preferable to simply state the strengths of this study (the relative improvement over earlier work  
632 should already be clear from justifications provided in previous chapters within the Introduction),  
633 consider "Here we use modern high-throughput sequencing techniques to examine interactions  
634 of microbial communities, bacterial and fungal, associated with leaves, roots, rhizosphere, and  
635 surrounding soils of two sorghum cultivars planted as a monocultures in agricultural fields during  
636 a period of drought. This experimental system allowed us to investigate resistance and resilience  
637 of these microbial communities under the stress of drought and subsequent recovery after  
638 watering...etc."

639  
640 **Response: We agree with the reviewer and have revised this paragraph following the reviewer's**  
641 **suggestion.**

642  
643 **Revised:** Here, we address the hypotheses about resistance ( $H_1$ ) and resilience ( $H_2$ ) using three  
644 approaches, (i) whole community composition, (ii) all pairwise correlations among individual taxa,  
645 and (iii) the co-occurrence network of significant positive interactions. In a semiarid agricultural  
646 field where control plots were watered regularly and test plots were **naturally** droughted before  
647 flowering **followed by regular wetting beginning at flowering**(Xu et al. 2018, Varoquaux et al.  
648 2019, Gao et al. 2020), we used modern high-throughput sequencing techniques to examine  
649 communities of bacteria and fungi associated with leaf, root, rhizosphere, and surrounding soil  
650 of two sorghum cultivars planted as a monocultures during a growing season. **One might wonder**  
651 **if the microbes in these fields were already adapted to drought, however a six-decade history of**  
652 **irrigated agriculture at the site indicates that the microbes in our system are not drought adapted**  
653 **(Gao et al. 2020).** Thus, this experimental system allowed us to investigate resistance and  
654 resilience of these microbial communities under the stress of drought and subsequent recovery  
655 after watering. Community assembly of both fungal mycobiome and bacterial microbiome were  
656 published earlier in separate papers (Xu et al. 2018, Gao et al. 2020). Here, we newly analyzed  
657 these two datasets together to test  $H_1$  and  $H_2$  using **the** three approaches **noted** above.

658  
659  
660 >>Questions related to approach, interpretation, and statistics used:

661  
662 Ecological concepts: The authors state, "We use definitions of ecological resistance as the change  
663 in compositional dissimilarity in response to stress and of ecological resilience as the recovery in

664 compositional dissimilarity when stress is relieved. Ecological resistance and resilience are  
665 determined by comparing compositional dissimilarity among communities within treatments  
666 (combined control and stress) with dissimilarity between control and stress communities.  
667 Specifically, resistance is  $1-R^2$  using control and droughted communities and resilience is  $1-R^2$   
668 using control and rewetted communities, in which  $R^2$  was determined by permutational analysis  
669 of variance (permanova 40)." The authors should directly cite works influencing the definitions  
670 here, for example the referenced paper Shade et al. 2012 provides excellent discussion over the  
671 concepts of resistance and resilience as well as related terminology. These authors state,  
672 "Disturbance and community stability are necessarily related, as stability is defined as a  
673 community's response to disturbance (Rykiel, 1985). Here, we adopt definitions most similar to  
674 Pimm (1984), in which stability is comprised of resistance and resilience (Table 1), two  
675 quantifiable metrics that are useful for comparing community disturbance responses and have  
676 precedent in the microbial ecology literature (e.g., Allison and Martiny, 2008). ... Here, resistance  
677 is defined as the degree to which a community is insensitive to a disturbance, and resilience is  
678 the rate at which a community returns to a pre-disturbance condition (Pimm, 1984)." These  
679 authors further define the related 'Stable state' as, "A condition where a community returns to  
680 its original composition or function following disturbance." As the ms authors base their analyses  
681 on Bray-Curtis dissimilarity, it should be noted that here a value of 0 means two sites that have  
682 the same community composition (they share the same species at the same levels of abundance),  
683 whereas a value of 1 denotes two communities that are completely dissimilar (i.e., they do not  
684 have species in common). Given this, could resilience, for example, be better defined as "the  
685 recovery in compositional similarity (i.e., Bray-Curtis dissimilarity values converging on zero)."  
686 Such a definition would have bearing, for example, on the interpretation of Figure 1. Further, this  
687 figure also stresses the reliance on the R-squared value (inversely proportional to the effect  
688 strength) in interpreting resistance or resilience, yet the generally low  $R^2$  here suggests very little  
689 variation in distances is explained by the groupings - are we to believe that this means (inversely)  
690 very strong resistance or resilience effects? Further, p-values in Permanova type are strongly  
691 influenced by sample size, was this accounted for in the analysis (similarly see comments  
692 regarding FDR below). Some of these issues need to be cleared up.

693

694 **Response: We appreciate the reviewer's suggestion and realized the confusion caused by the**  
695 **usage of  $1-R^2$ . Now we directly calculated resistance and resilience following the methods of**  
696 **Shade et al 2012 and removed the part about  $1-R^2$  throughout our ms.**

697

698 **Added text: Please see General Concern 7, above.**

699

700 Network analysis: When running numerous parallel correlations, as are possible with  
701 metabarcoding sequence data, the chance of recovering spurious significant positive correlations  
702 are greatly enhanced. There are statistical methods, such as FDR (false discovery rate), that can be  
703 used to reduce the influence of false positives. This may be especially true for non-parametric  
704 approaches (i.e., Spearman's ranked correlation). Corrective measures (i.e., FDR), may be  
705 warranted here to reduce type I errors.

706



707 Response: We agree with the reviewer. Now, the p-values are corrected for multiple testing using  
708 the FDR method. Our key findings were not changed by the FDR correction of p values. We added  
709 this information in the revised manuscript.

710

711 Revised text: Please see General concern 3, above.

712

713 Guild approach: The author also use a fungal guild concept in their network analyses, while these  
714 concepts appear to be derived from the paper below, yet the authors do not directly cite this  
715 paper/source/software and should (especially in the methods):

716

717 Response: We thank the reviewer for detecting our omission. This reference is now cited in our  
718 revised manuscript.

719

720 Nguyen NH, Song Z, Bates ST, Branco, S, Tedersoo L, Menke J, Schilling JS, Kennedy PG. 2016.  
721 FUNGuild: an open annotation tool for parsing fungal community datasets by ecological guild.  
722 Fungal Ecology 20:241-248.

723

724 Further, care should also be taken when interpreting the network analysis results. For example,  
725 the authors claim that "co-occurrence networks among functional guilds of rhizosphere fungi ...  
726 were dramatically strengthened by pre-flowering drought", yet Figure 2B show that the  
727 "strengthened" network contains numerous saprotrophs and plant pathogens, suggesting that  
728 "pre-flowering drought" contributed to decay (perhaps of dead plant matter) and disease.

729

730 Response: In this study, we found that a number of fungal pathogens are present in the network,  
731 that these fungi correlate with saprotrophic, endophytic and mycorrhizal fungi, and that  
732 correlations among fungal OTUs increased. However, in our previous analysis of fungal  
733 community composition (Nat Comm paper, Fig. 5A, C; Fig. S2A), we showed that pre-flowering  
734 drought drastically reduced the relative abundance of fungal pathogens. Thus, although  
735 correlation between fungal OTUs increased, it is not likely that plant disease or decay increased  
736 in pre-flowering drought.

737

738 Added: The strengthened fungal network in rhizosphere seen in this study was coupled with the  
739 co-occurrence of a number of fungal pathogens with saprotrophic, endophytic and mycorrhizal  
740 fungi. However, it is not likely that there was an increase in plant decay or disease, because we  
741 previously found that the relative abundance of rhizosphere fungal pathogens was drastically  
742 decreased by pre-flowering drought (Gao et al. 2020).

743

744 Also see comments above regarding potential overreaching statements.

745

746 Examples of other issues:

747

748 Introduction: starting @ line 153 - "seedling emergence to fruit maturation" ... as sorghum is a  
749 member of the Poaceae (i.e., a grass) the seed (e.g., millet) of sorghum is typically referred to as  
750 a cereal grain rather than a "fruit".

751

752 Response: We agree with the reviewer that the seeds of grasses, like sorghum, are typically  
753 referred to as grains. However, we feel that we are botanically correct in that sorghum, like all  
754 angiosperms, makes a fruit with seed surrounded by a fruit or pericarp. In the case of grasses,  
755 the pericarp is fused to the seed coat and is termed a caryopsis.

756

757 However, we deleted this sentence in light of this reviewer's other comment.

758

759 Results: starting @ line 165 - "As noted above, the simple fact that fungi grow more slowly than  
760 bacteria..." I don't feel that this is a simple matter, bacteria "grow" as single-celled  
761 microorganisms through binary fission where, yes, doubling times can range in 10s of mins.  
762 Growth for fungi is something completely different; a (sometimes massive) multicellular  
763 (generally) mass of hyphae (a mycelium) that grows by extension at the hyphal tip (unless we are  
764 talking about yeasts), where some taxa (e.g., Neurospora) can have relatively high growth rates  
765 (e.g., several mm per hour) at the hyphal tip. Therefore, a reductionist approach to growth rates  
766 is likely not warranted here.

767

768 Response: Although we agree with the reviewer that some fungi can grow quickly and some  
769 bacteria can grow slowly, it is generally accepted that most fungi grow more slowly than bacteria.

770

771 Because the concept that fungi respond more slowly than bacteria to stress is fundamental to  
772 the resistance/resilience hypothesis as developed by de Vries and Shade, we feel that it should  
773 remain in the manuscript.

774

775 Revised text: As noted above, the simple fact that fungi grow more slowly than bacteria is the  
776 basis of the hypotheses that (H<sub>1</sub>) fungal communities should be more resistant than bacterial  
777 communities to drought stress, and (H<sub>2</sub>) that fungal communities should be less resilient than  
778 bacterial communities when the stress is relieved by rewetting (de Vries and Shade 2013). In  
779 addition to growth rate, these two hypotheses may be related to differences in growth form  
780 between fungi and bacteria. For example, multicellular hyphal growth versus unicellular division  
781 or the greater thickness of fungal cell walls as compared to those of bacteria (Schimel et al. 2007,  
782 Guhr et al. 2015).

783

784 Results: paragraph @ lines 165-179 - There are no results given here, this paragraph has  
785 elements that may be more appropriate for the Methods section.

786

787 Original text: As noted above, the simple fact that fungi grow more slowly than bacteria is the  
788 basis of the hypotheses that (H<sub>1</sub>) fungal communities should be more resistant than bacterial  
789 communities to drought stress, and (H<sub>2</sub>) that fungal communities should be less resilient than  
790 bacterial communities when the stress is relieved by rewetting 18. We tested these hypotheses  
791 at the community composition level by blending the fungal and bacterial datasets generated  
792 from the same leaf, root, rhizosphere and soil samples collected from field-grown sorghum that  
793 had been either irrigated as a control, or subjected to pre-flowering drought or post-flowering  
794 drought 10,11. We use definitions of ecological resistance as the change in compositional  
dissimilarity in response to stress and of ecological resilience as the recovery in compositional

795 dissimilarity when stress is relieved. Ecological resistance and resilience are determined by  
796 comparing compositional dissimilarity among communities within treatments (combined control  
797 and stress) with dissimilarity between control and stress communities. Specifically, resistance is  
798 1-R2 using control and droughted communities and resilience is 1-R2 using control and rewetted  
799 communities, in which R2 was determined by permutational analysis of variance (permanova 40).

800

801 **Response: we added text and figure, please see General Concern 7, above.**

802

803 **<b>Reviewer #3 (Remarks to the Author):</b>**

804

805 In this manuscript, the authors report the effect of pre-flowering drought, post-flowering drought,  
806 and recovery after pre-flowering drought on fungal and bacterial communities and networks  
807 in/on roots, rhizosphere soil, bulk soil, and leaves of field-grown sorghum. They hypothesise,  
808 based on previous work, that fungal communities and network are more resistant but less  
809 resilient than those of bacteria. They test these hypotheses using previously published data for  
810 new analyses. They find that their hypothesis that fungal communities are more resistant and  
811 less resilient than bacterial communities is supported. Using all correlations between bacteria  
812 and fungi in the four compartments, they find that the frequency of positive correlations  
813 increased in pre-flowering drought, but using only significant positive correlations (ie co-  
814 occurrence networks), they find that pre-flowering drought disrupts networks in roots,  
815 rhizosphere and soil but increases their connectivity on leaves. Re-watering resulted in networks  
816 resembling control networks again, except for the network in soil (but note that I inferred those  
817 results myself from Fig. 3 as I found the description of the results hard to follow). They conclude  
818 that understanding microbial network response to stress might inform manipulating microbial  
819 communities for increased plant tolerance to stress in agricultural settings.

820

821 I enjoyed reading this mostly clearly written manuscript that addresses interesting hypotheses.  
822 However, I found the amount of results presented quite overwhelming and not always easy to  
823 follow/ interpret. The hypotheses stated are quite abstract and informed entirely by previous  
824 work on soil fungal and bacterial communities and network responses to drought, and in that  
825 sense the paper reads as largely confirmatory and leans heavily on the results from a few recent  
826 papers. I also feel that there is really a severe lack of context on why we want to understand how  
827 the communities/ networks in these different plant compartments respond to drought. To me, it  
828 would be much more interesting to focus in on the differences between these compartments.  
829 What drives the assembly of fungal and bacterial communities on leaves, and how is this different  
830 from those in roots and in soil? What would be the implications for their functioning and for plant  
831 health of the changes in these communities in response to drought? I am missing all of this in the  
832 manuscript, other than quite vague and general statements.

833

834 **Response: We agree with the reviewer that understanding the drivers of community assembly in**  
835 **different compartments is an interesting topic and, in fact, we have investigated this topic in our**  
836 **previous published studies (Gao et al 2020 Nat Com; Xu et al 2018 PNAS). Those studies focused**  
837 **on fungi and bacteria independently. Here, we compare fungi and bacteria and examine their co-**  
838 **occurrences. In particular, we investigate the resistance and resilience of bacterial and fungal**

839 communities. We feel that this question is of broad interest to all ecologists and are encouraged  
840 that all four reviewers' comment on the importance of this topic.

841

842 We hesitate to add more information about the context of different compartments, with this  
843 modest exception.

844

845 Revised: In the interior and surface of different compartments such as leaf, root and rhizosphere,  
846 crop plants form essential beneficial partnerships with microbes, both fungi and bacteria, that  
847 impact plant drought responses.

848

849

850 I would suggest to focus on this, and I would also suggest ditching the post-flowering drought  
851 treatment, as there is no recovery phase after this drought, which makes it difficult to compare  
852 these data to the pre-flowering drought.

853

854 Response: We appreciate the reviewer's suggestion to focus on pre-flowering drought. We agree  
855 with the reviewer and have removed the part on post-flowering drought in the new ms.

856

857 Added text: The experimental design of pre-flowering drought followed by regular wetting  
858 beginning at flowering represent an ideal system for testing the hypotheses that fungi are (i)  
859 more resistant to drought stress but (ii) less resilient when the stress is relieved by rewetting than  
860 bacteria. However, the experimental design of regularly watering followed by post-flowering  
861 drought is not relevant to these two hypotheses. Therefore, for simplicity, this study only  
862 included control and pre-flowering drought (followed by rewetting) treatments and did not  
863 analyze the post-flowering drought treatment.

864

865 Moreover, while the manuscript focusses on networks, never is the reliability of these  
866 correlations and whether they actually represent interactions between microbes discussed.  
867 Positive correlations between microbes can simply indicate niche sharing or responding to the  
868 same drivers. Moreover, it is not clear which OTUs were used for correlations (all? Or the ones  
869 that occurred over a certain number of experimental units? Or the most abundant ones?), and  
870 on how many observations these correlations are based. From the methods it seems that there  
871 were 6 replicates of each treatment – does this mean that correlations were based on only 6 data  
872 points? Then I would seriously question the robustness of the resulting networks.

873

874 Response: We agree with the reviewer that correlation does not necessarily mean interaction.  
875 We now discuss inferring microbial interaction from microbial correlation.

876

877 Revised text, please see General Concern 5 above.

878

879 We thank the reviewer for letting us know that our OTU selection was not clear. Not all OTUs are  
880 used for correlation analysis, we only used taxa with > 30 reads and occurred in at least 8  
881 communities in each analysis. In this regard, we are following the approach of Shi et al (Shi et al.  
882 2016) and de Vries et al (de Vries et al. 2018).

883

884 We thank the reviewer for alerting us to the fact that the number of data points was obscure.  
885 Correlations for network analyses were not limited to 6 data points, rather we used 36 or 48 data  
886 points. Our analyses combine several different time points for the same treatment. For drought,  
887 we had 36 data points (6 plots \* 6 time points = 36 data points) and for re-wetting we had 48  
888 data points (6 plots\* 8 time points = 48 data points).

889

890 Added text: Please see General Concern 4, above

891

892 In addition, while on close inspection the analyses seem robust and the results are mostly  
893 correctly interpreted, I found the figures quite hard to understand as the axes and legends are  
894 rather ambiguous. The clarity can be improved, and perhaps also the presentation, because as I  
895 said above the amount of data is overwhelming.

896

897 Response: Again, we thank the reviewer for alerting us to the difficulty interpreting figures. We  
898 believe that we have improved the presentation and legends of all the figures.

899

900 More detailed comments:

901 L 164: yes, but also because of their hyphal growth form and thick cell walls, see Schimel et al.  
902 2007 Ecology and Guhr et al. 2015 PNAS.

903 Response. We agree with the reviewer and have revised our text.

904

905 Revised text: In addition to growth rate, these two hypotheses may be related to differences in  
906 growth form between fungi and bacteria. For example, multicellular hyphal growth v. unicellular  
907 division or the greater thickness of fungal cell walls as compared to those of bacteria (Schimel et  
908 al. 2007, Guhr et al. 2015).

909

910 L 175-184 and Figure 1: I found this section very hard to follow. Here, it says that resistance and  
911 resilience are calculated as  $1-R_2$ , but in the figure Bray-Curtis dissimilarities are reported (are  
912 similarities? This is not clear), and in the figure legend it says resistance and resilience. I am lost.  
913 It's also not immediately clear what is meant by inter-group and intra-group.

914

915 Response: We realized the confusion caused by the usage of  $1-R_2$ . Now we directly calculated  
916 resistance and resilience following the methods of Shade et al 2012, and removed the part about  
917  $1-R_2$  throughout our ms.

918

919 Added text: Please see General Concern 7, above.

920

921 L 205: can you be more specific? Which compartments?

922 Text in original ms: Neither did we find consistent support for the differences ascribed to bacteria  
923 and fungi in  $H_2$  as the strongest decreases in the proportion of positive correlations during  
924 rewetting could occur in any of the three comparisons (F-F in rhizosphere and soil, B-B in root,  
925 and B-F in leaf) (Fig. 2B).

926

927 **Response: We agree with the reviewer that we could be more specific.**

928

929 **Revised text: Neither did we find consistent support for the differences ascribed to bacteria and**  
930 **fungi in H<sub>2</sub> as the strongest decreases in the proportion of positive correlations during rewetting**  
931 **occurred at F-F in rhizosphere and soil, and B-B in leaf and root (Fig. 2B).**

932

933 L 238-244: I found this section very hard to read, as pretty much every sentence mentions that  
934 vertices are dropped and rise, but in response to what and compared to what? I assume to  
935 drought, but this is never explicitly mentioned.

936 Text in original ms: In general, for pre-flowering drought, we found no consistent support for the  
937 difference between bacteria and fungi inherent in H<sub>1</sub>. Rhizosphere was the one compartment  
938 where B-B vertices dropped and F-F vertices rose, as expected, but was offset by root and soil,  
939 where vertices dropped in all networks, B-B, F-F and B-F (Fig. 3-4; Fig. S2-4). In leaf, the result was  
940 the opposite of expectation, as B-B rose while F-F was unchanged.

941

942 **Response: We have attempted to simplify a complex result, below.**

943

944 **Revised: In general, we found no consistent support for the difference between bacteria and**  
945 **fungi inherent in H<sub>1</sub>. Rhizosphere was the one compartment where B-B vertices dropped and F-F**  
946 **vertices rose in response to drought, as expected, but this result was offset in root and soil, where**  
947 **vertices dropped in all networks, B-B, F-F and B-F (Fig. 3-4; Fig. S3-4).**

948

949 L 252: The biotic interactions become even more complex than the control after rewatering. But  
950 is this resilience? Resilience means that the disturbed treatment is approaching or resembling  
951 the control.

952 Text in original ms: However, we found no support for the H<sub>2</sub> in leaf and root where the F-F did  
953 not lose complexity, although both the B-B and B-F networks gained complexity (Fig. 3-4, Fig. S2,  
954 S3).

955

956 **Response: We appreciate the reviewer for pointing out this complexity. Our results suggest that**  
957 **resilience does not necessarily stop when approaching the control values, but that resilience can**  
958 **exceed the control. This situation has rarely been observed, but we find it in our results.**

959

960 **Added text: Our results suggest that resilience does not necessarily stop when approaching the**  
961 **control values, but that resilience of biotic interaction can exceed the control. Our data highlight**  
962 **a phenomenon that has rarely been reported (Shade et al. 2012).**

963

964 L 315-318: I don't understand this sentence

965

966 Text in original ms: The main difference between our study and these others is our use of one  
967 species of plant whose growth is synchronous whereas none of the other studies focused on just  
968 one plant species [although de Vries, et al. 19 used just 4 plant species]. Other salient differences  
969 include our using DNA sequence of variable regions to identify bacteria and fungi and our field

970 season being free of precipitation, making it straightforward to impose drought and then relieve  
971 it through irrigation.

972

973 **Response: We have attempted to make the sentence more understandable.**

974

975 **Revised text: The main difference between our study and these others is the simplicity of our**  
976 **system, the use of DNA metabarcoding to identify microbes and the dependability of natural**  
977 **drought in an arid environment. We used just one species of plant whose growth is synchronous**  
978 **whereas all other studies focused on at least four species (de Vries et al. 2018) and typically many**  
979 **plant species. We used DNA sequence of variable regions to identify bacteria and fungi. Our field**  
980 **season was free of precipitation for the entire growing season, making it straightforward to**  
981 **experience drought and then relieve it through irrigation.**

982

983 L 325: not just in leaf in post-flowering drought, also in soil and root

984 L 324: De Vries et al. 2018 Nat Comms also analysed combined bacterial-fungal networks – this  
985 is detailed in their supplementary material

986 Text in original ms: Extending the analysis to previously unexamined B-F interactions, we found  
987 increases in all compartments except soil in the pre-flowering drought and leaf in post-flowering  
988 drought (Fig. 2).

989

990 **Response: We thank the reviewer for pointing out these facts. we rephrased this sentence**  
991 **accordingly.**

992 **Revised: Extending the analysis to previously poorly examined B-F interactions, we found**  
993 **increases in these interactions in root and rhizosphere but no change in soil (Fig. 2).**

994

995 L 327-330: this sentence makes no sense to me. Hypotheses developed from one type of analysis?  
996 I would think that it is not about the analysis but about the concept. The analysis is just a means  
997 to test a hypothesis.

998 Text in original ms: A simple explanation for our observations is that hypotheses developed from  
999 one type of analysis are specific to that type, and that empirical hypotheses are more difficult to  
1000 reject than those based on models.

1001

1002 **Response: We removed this sentence.**

1003

1004 L330-331: again, I have no idea what is meant here. Whole communities hide variation based on  
1005 compartments?

1006 Text in original ms: What is also clear is that analyses of whole communities hide variation based  
1007 on compartment as well as the identities of partners in particular interactions.

1008

1009 **Response: We removed this sentence.**

1010

1011 L332-334: I think it is rather stark to make inferences about applications in agriculture from these  
1012 theoretical hypotheses



1013 Text in original ms: These two aspects will be important to efforts to manipulate microbes to  
1014 improve agricultural outcomes because effective application of microbes to affect agricultural  
1015 outcomes must involve specific microbes and compartments.

1016

1017 Response: **We removed this sentence.**

1018

1019 Methods: I understand that these are previously published data but there's really more detail  
1020 needed here. How large were the plots? What was the experimental layout? How were samples  
1021 collected? What other analyses were done? Were there six replicates per treatment, and does  
1022 this mean that correlations for network analyses were done only using 6 datapoints....?

1023

1024 **Response: we now provided more info about the experiment design and sampling, and data  
1025 analysis.**

1026

1027 **Added texts: Please see General concern 4, above.**

1028

1029 **<b>Reviewer #4 (Remarks to the Author):</b>**

1030

1031 Cheng Gao and colleagues in their manuscript 'Resistance and Resilience in Microbes: Co-  
1032 occurrence Networks Delve Deeper Than Community Composition' address two fundamental  
1033 questions in the field of microbial community compositions: Resistance and resilience. To do so,  
1034 they combine two very comprehensive previously published datasets analysing microbial  
1035 communities on crop plants under extreme drought conditions and irrigation. The datasets are  
1036 based on 16S and ITS amplicon sequencing and the analyses in the paper is primarily based on  
1037 pairwise correlations of these datasets.

1038 Particularly the question if fungi are more resistant H1 but less resilient H2 than bacteria is  
1039 certainly a key question in the field and addressed in depth in this manuscript. Besides direct  
1040 analyses of correlation data, the authors use networks to get deeper insights into community  
1041 structures. They identify a disruption of communities by drought and see an increase of positive  
1042 correlations among bacteria, fungi and across kingdoms correlating bacteria and fungi. In  
1043 combination with network analyses, this gives support for the stress gradient hypothesis. Based  
1044 on their analyses, they can further underpin the importance of mycorrhiza fungi in stabilizing  
1045 communities under drought.

1046

1047 In summary, the paper touches a very timely and relevant field and the authors show convincingly  
1048 that their dataset can be used to infer their central hypothesis H1 and H2. Although I think this  
1049 manuscript has great potential it would certainly benefit from more details and by addressing  
1050 some of the following points:

1051 1. As the authors state, key to the paper are pairwise correlations. The authors focus, however,  
1052 only on Spearman's Rho or Spearman's rank-order correlation. This assumes a monotonic  
1053 relationship. From the paper it is not clear if the authors have analyzed other correlations to show  
1054 that this fits the best or have plotted the data to see if this really fits for all samples. Why not  
1055 using Spearman's correlation, particularly for the networks this might be a better choice or a  
1056 combination?



1057

1058 Response: we used Spearman's correlation. We guess the reviewer asks about our not using  
1059 Pearson's correlation.

1060

1061 Response: We used Spearman correlation to make our work comparable with the study of de  
1062 Vries et al 2018 Nat Commun, who also used Spearman correlation.

1063 We added Pearson correlation and found a similar pattern of networks. We now provide this  
1064 result as a supplementary Figure. We also added the CoDa approach, as described in response to  
1065 the next comment by Reviewer #4.

1066

1067 Added text and figures. Please see response to General Concern 2, above.

1068

1069 2. Further to the correlation analyses: How valid is it to correlate 16S and ITS data together to  
1070 make conclusions about robustness and resilience? Both will result in completely different  
1071 resolution. ITS is used to resolve on a species level, 16S will rarely branch that deep. Wouldn't it  
1072 be better to compare 16S and 18S? Is it possible that bacteria are more resilient because of less  
1073 resolution, meaning other bacteria move in following rewetting but they are seen as having the  
1074 same 16S sequence while fungi move back in that show the same taxonomic distance but can be  
1075 resolved?

1076

1077 Response: Thank you for pointing out this concern. We are aware about the reviewer 4's concern  
1078 that 16S and ITS identify bacteria and fungi at different levels of taxonomic resolution (Bruns &  
1079 Taylor 2016 Science). However, we feel that lessening the resolution for fungi will not help the  
1080 analyses. Raising the resolution for bacteria would help the analyses, but we, and all other  
1081 researchers, are limited at the present to 16S for bacterial identification.

1082

1083 It is not clear to us that microbial communities might appear more resilient when more coarsely  
1084 identified. For example, if all fungi were sorted into two phyla, Ascomycota and Basidiomycota,  
1085 it would be very difficult to detect either resistance or resilience. As taxonomic identification  
1086 became more finely determined, resistance and resilience could be discerned. However, it is not  
1087 clear that the response to stress or its relief would be favored as taxonomic determination  
1088 became increasingly refined.

1089

1090 Still, to relief the reviewer's concern about the different resolution of 16S and ITS, we compared  
1091 bacterial 16S OTUs against both fungal ITS OTUs as well as fungal families. We reported only  
1092 results that are robust across these two conditions.

1093

1094 Added text and figures: Please seen response to General concern 1, above.

1095

1096 3. Very much depends on the calculation of the networks. From the methods I can see igraph has  
1097 been used and the implemented calculation of networks. To better understand the quality and  
1098 robustness of the networks it certainly needs more information on the calculation. For example,  
1099 how was sparsity addressed and how density of the networks. Based on the figures, density is a  
1100 particular issue, as very dense networks are compared to extremely sparse networks. I would

1101 suggest to use at least one other method to calculate the networks correcting for abundance and  
1102 sparsity or not correcting and comparing those to each other. In my opinion this is relevant to  
1103 identify if modularity is robust, as this has been debated a lot.

1104

1105 **Response:** In addition to the Spearman and Pearson method, we made additional network  
1106 analyses using the CoDa method of Gloor et al 2017 to account for the sparsity of the data. We  
1107 only report the results that are robust across these three methods. These three methods showed  
1108 similar patterns in terms of the difference between control and drought, and between control  
1109 and rewetting.

1110 We keep the results of Spearman in the main figures, as Spearman method is widely used in  
1111 ecological research such as de Vries et al 2018 Nat Commun. Also we keep the result of Pearson  
1112 and CoDa method in the supplementary.

1113 We now provide more information about the calculation of the networks.

1114

1115 **Added text and figures:** Please see response to General Concern 2, above.

1116

1117 4. As far as I understand from the data sets, the samples are not independent from each other  
1118 but have a time factor: PRE-Drought, PRE-Rewatering, POST-Drought. To analyze stability it would  
1119 be useful to track vertices over time and compare PRE and POST networks directly. Particularly  
1120 positional stability of each vertex would be a good additional measure when comparing different  
1121 network calculations.

1122

1123 **Response:** Although it is desirable to track vertices over time, we are unable to do so because we  
1124 have six replications in each time point and would need at least ten replicates for this analysis.  
1125 We do note that six replicates at each time point is twice the norm in studies of microbial  
1126 communities.

1127

1128 5. A minor thing but relevant to understand what has been done: What are the Guilds and how  
1129 have they been calculated? I guess this is based on Nguyen et al 2016 but I could not find any  
1130 information.

1131 **Response:** We now cite Nguyen et al 2016 in the our revised manuscript.

1132

1133 6. Question concerning the experimental layout: The experiments have been set up in an area  
1134 with extremely low precipitation. So any microbe in the soil would be adapted to cope with  
1135 drought. In this case I would assume that regular irrigation is a perturbation to the community  
1136 and not drought. Have samples been taken before the planting that could be compared? Is the  
1137 drought state perhaps a communal 'recovery'?

1138

1139 **Response:** The reviewer raises an interesting point. Although the precipitation is low in our  
1140 research area in the Central valley, our site has been in agricultural cultivation with irrigation for  
1141 more than 60 years. We have thought about this question quite a bit and our thinking is that our  
1142 microbes are likely adapted to irrigation and that the perturbation is drought is perturbation.

1143

1144 [Added text: One might wonder if the microbes in these fields were already adapted to drought,](#)  
1145 [however a six-decade history of irrigated agriculture at the site indicates that the microbes in our](#)  
1146 [system are not drought adapted.](#)

1147

1148 Literature cited in this response to reviewers.

1149

1150 Agler, M. T., J. Ruhe, S. Kroll, C. Morhenn, S. T. Kim, D. Weigel, and E. M. Kemen. 2016.

1151 Microbial Hub Taxa Link Host and Abiotic Factors to Plant Microbiome Variation. *PLoS*  
1152 *Biol* **14**:e1002352.

1153 Barnard, R. L., C. A. Osborne, and M. K. Firestone. 2013. Responses of soil bacterial and fungal  
1154 communities to extreme desiccation and rewetting. *Isme Journal* **7**:2229-2241.

1155 Bertness, M. D., and R. Callaway. 1994. Positive interactions in communities. *Trends Ecol Evol*  
1156 **9**:191-193.

1157 Callaway, R. M., R. W. Brooker, P. Choler, Z. Kikvidze, C. J. Lortie, R. Michalet, L. Paolini, F. I.

1158 Pugnaire, B. Newingham, E. T. Aschehoug, C. Armas, D. Kikodze, and B. J. Cook. 2002.

1159 Positive interactions among alpine plants increase with stress. *Nature* **417**:844-848.

1160 Coyte, K. Z., J. Schluter, and K. R. Foster. 2015. The ecology of the microbiome: Networks,  
1161 competition, and stability. *Science* **350**:663-666.

1162 de Vries, F. T., R. I. Griffiths, M. Bailey, H. Craig, M. Girlanda, H. S. Gweon, S. Hallin, A.

1163 Kaisermann, A. M. Keith, M. Kretzschmar, P. Lemanceau, E. Lumini, K. E. Mason, A.

1164 Oliver, N. Ostle, J. I. Prosser, C. Thion, B. Thomson, and R. D. Bardgett. 2018. Soil

1165 bacterial networks are less stable under drought than fungal networks. *Nat Commun*  
1166 **9**:3033.

1167 de Vries, F. T., and A. Shade. 2013. Controls on soil microbial community stability under climate  
1168 change. *Front Microbiol* **4**:265.

1169 Dini-Andreote, F., M. de Cássia Pereira e Silva, X. Triadó-Margarit, E. O. Casamayor, J. D. van

1170 Elsas, and J. F. Salles. 2014. Dynamics of bacterial community succession in a salt marsh

1171 chronosequence: evidences for temporal niche partitioning. *The Isme Journal* **8**:1989-

1172 2001.

1173 Duran, P., T. Thiergart, R. Garrido-Oter, M. Agler, E. Kemen, P. Schulze-Lefert, and S. Hacquard.

1174 2018. Microbial Interkingdom Interactions in Roots Promote Arabidopsis Survival. *Cell*

1175 **175**:973-983 e914.

1176 Farrer, E. C., D. L. Porazinska, M. J. Spasojevic, A. J. King, C. P. Bueno de Mesquita, S. A. Sartwell,

1177 J. G. Smith, C. T. White, S. K. Schmidt, and K. N. Suding. 2019. Soil Microbial Networks

1178 Shift Across a High-Elevation Successional Gradient. *Frontiers in Microbiology* **10**.

1179 Faust, K., G. Lima-Mendez, J.-S. Lerat, J. F. Sathirapongsasuti, R. Knight, C. Huttenhower, T.

1180 Lenaerts, and J. Raes. 2015. Cross-biome comparison of microbial association networks.

1181 *Frontiers in Microbiology* **6**.

1182 Gao, C., L. Montoya, L. Xu, M. Madera, J. Hollingsworth, E. Purdom, V. Singan, J. Vogel, R. B.

1183 Hutmacher, J. A. Dahlberg, D. Coleman-Derr, P. G. Lemaux, and J. W. Taylor. 2020.

1184 Fungal community assembly in drought-stressed sorghum shows stochasticity, selection,

1185 and universal ecological dynamics. *Nat Commun* **11**:34.

1186 Goberna, M., A. Montesinos-Navarro, A. Valiente-Banuet, Y. Colin, A. Gómez-Fernández, S.

1187 Donat, J. A. Navarro-Cano, and M. Verdú. 2019. Incorporating phylogenetic metrics to

1188 microbial co-occurrence networks based on amplicon sequences to discern community  
1189 assembly processes. *Molecular Ecology Resources* **19**:1552-1564.

1190 Guhr, A., W. Borken, M. Spohn, and E. Matzner. 2015. Redistribution of soil water by a  
1191 saprotrophic fungus enhances carbon mineralization. *Proceedings of the National*  
1192 *Academy of Sciences* **112**:14647-14651.

1193 Hammarlund, S. P., and W. R. Harcombe. 2019. Refining the stress gradient hypothesis in a  
1194 microbial community. *Proc Natl Acad Sci U S A* **116**:15760-15762.

1195 Hernandez, D. J., A. S. David, E. S. Menges, C. A. Searcy, and M. E. Afkhami. 2021. Environmental  
1196 stress destabilizes microbial networks. *The Isme Journal* **15**:1722-1734.

1197 Hoek, T. A., K. Axelrod, T. Biancalani, E. A. Yurtsev, J. Liu, and J. Gore. 2016. Resource  
1198 Availability Modulates the Cooperative and Competitive Nature of a Microbial Cross-  
1199 Feeding Mutualism. *PLoS Biol* **14**:e1002540.

1200 Huang, R., S. P. McGrath, P. R. Hirsch, I. M. Clark, J. Storkey, L. Wu, J. Zhou, and Y. Liang. 2019.  
1201 Plant-microbe networks in soil are weakened by century-long use of inorganic  
1202 fertilizers. *Microbial Biotechnology* **12**:1464-1475.

1203 Jiang, Y., Y. Lei, Y. Yang, H. Korpelainen, Ü. Niinemets, and C. Li. 2018. Divergent assemblage  
1204 patterns and driving forces for bacterial and fungal communities along a glacier forefield  
1205 chronosequence. *Soil Biology and Biochemistry* **118**:207-216.

1206 McHugh, T. A., G. W. Koch, and E. Schwartz. 2014. Minor changes in soil bacterial and fungal  
1207 community composition occur in response to monsoon precipitation in a semiarid  
1208 grassland. *Microb Ecol* **68**:370-378.

1209 McHugh, T. A., and E. Schwartz. 2016. A watering manipulation in a semiarid grassland induced  
1210 changes in fungal but not bacterial community composition. *Pedobiologia* **59**:121-127.

1211 Piccardi, P., B. Vessman, and S. Mitri. 2019. Toxicity drives facilitation between 4 bacterial  
1212 species. *Proc Natl Acad Sci U S A* **116**:15979-15984.

1213 Schimel, J., T. C. Balsler, and M. Wallenstein. 2007. MICROBIAL STRESS-RESPONSE PHYSIOLOGY  
1214 AND ITS IMPLICATIONS FOR ECOSYSTEM FUNCTION. *Ecology* **88**:1386-1394.

1215 Shade, A., H. Peter, S. D. Allison, D. L. Baho, M. Berga, H. Burgmann, D. H. Huber, S.  
1216 Langenheder, J. T. Lennon, J. B. Martiny, K. L. Matulich, T. M. Schmidt, and J.  
1217 Handelsman. 2012. Fundamentals of microbial community resistance and resilience.  
1218 *Front Microbiol* **3**:417.

1219 Shi, S., E. E. Nuccio, Z. J. Shi, Z. He, J. Zhou, and M. K. Firestone. 2016. The interconnected  
1220 rhizosphere: High network complexity dominates rhizosphere assemblages. *Ecology*  
1221 *letters* **19**:926-936.

1222 Sun, S., S. Li, B. N. Avera, B. D. Strahm, B. D. Badgley, and F. E. Löffler. 2017. Soil Bacterial and  
1223 Fungal Communities Show Distinct Recovery Patterns during Forest Ecosystem  
1224 Restoration. *Applied and Environmental Microbiology* **83**:e00966-00917.

1225 Varoquaux, N., B. Cole, C. Gao, G. Pierroz, C. R. Baker, D. Patel, M. Madera, T. Jeffers, J.  
1226 Hollingsworth, J. Sievert, Y. Yoshinaga, J. A. Owiti, V. R. Singan, S. DeGraaf, L. Xu, M. J.  
1227 Blow, M. J. Harrison, A. Visel, C. Jansson, K. K. Niyogi, R. Hutmacher, D. Coleman-Derr, R.  
1228 C. O'Malley, J. W. Taylor, J. Dahlberg, J. P. Vogel, P. G. Lemaux, and E. Purdom. 2019.  
1229 Transcriptomic analysis of field-droughted sorghum from seedling to maturity reveals  
1230 biotic and metabolic responses. *Proc Natl Acad Sci U S A*:27124-27132.

1231 Velez, P., L. Espinosa-Asuar, M. Figueroa, J. Gasca-Pineda, E. Aguirre-von-Wobeser, L. E.  
1232 Eguiarte, A. Hernandez-Monroy, and V. Souza. 2018. Nutrient Dependent Cross-  
1233 Kingdom Interactions: Fungi and Bacteria From an Oligotrophic Desert Oasis. *Front*  
1234 *Microbiol* **9**:1755.

1235 Xu, L., D. Naylor, Z. Dong, T. Simmons, G. Pierroz, K. K. Hixson, Y. M. Kim, E. M. Zink, K. M.  
1236 Engbrecht, Y. Wang, C. Gao, S. DeGraaf, M. A. Madera, J. A. Sievert, J. Hollingsworth, D.  
1237 Birdseye, H. V. Scheller, R. Hutmacher, J. Dahlberg, C. Jansson, J. W. Taylor, P. G.  
1238 Lemaux, and D. Coleman-Derr. 2018. Drought delays development of the sorghum root  
1239 microbiome and enriches for monoderm bacteria. *Proc Natl Acad Sci U S A* **115**:E4284-  
1240 E4293.

1241

## **Reviewer comments, second round –**

Reviewer #1 (Remarks to the Author):

The authors have carried out a considerable revision of their manuscript, and in general, have addressed most of my concerns. I have some remaining concerns, which I detail below. I find interpreting Figure 1 and S1 difficult. I particularly struggled with the shaded vs unshaded data. Could the authors help the reader somehow, perhaps by indicating in the text discussing the figure whether they are referring to the shaded or unshaded parts of the graph?

Regarding the general concern 3 about correcting p-values with FDR. This seems an appropriate response, however, without statistics regarding how many nodes or edges were removed it is hard to assess the impact of FDR in their networks.

Regarding general concern 4: I am happy with the author's response.

Regarding general concern 5: I have some remaining concerns about calling associations/co-occurrences as interactions throughout the manuscript. The authors refer to F-F, F-B interactions etc throughout the manuscript, but this is not what they measured. The text in lines 415-425 is useful and needed, however, the authors themselves acknowledge that correlation does not equate to interaction. Ideally, they should use associations or co-occurrences instead.

Regarding general concern 6: I am happy with the author's response.

Line 214: the authors wrote "we found that the resistance to drought stress for fungal mycobiomes was consistently stronger than that for bacterial microbiomes for weeks 5 in root, weeks 4 – 6 in rhizosphere, and weeks 4 and 6 – 8 in rhizosphere". Do the authors mean ..."weeks 4 and 6 – 8 in soil"?

In some cases, the authors seem to overstate the differences between networks (to me anyway). The use of drastically/strongly enhanced co-occurrences in some cases seems inappropriate when "enhancing" alone would suffice. In the legend for figure S3: I would say that FF- co-occurrence is enhanced by drought but not necessarily drastically so. Following this, the recovery in F-F network following re-wetting seems subtle for soil (if at all) and for root. For Figure S14 legend, I find the use of "drastically" and "strongly" excessive. Likewise for enhanced in figure S15 when discussing rhizosphere F-F network.

In Fig 1 legend, the authors state "32 of 36 cases". What is each "case", I presume it is communities, and the authors should indicate that.

Line 466: It is helpful that the authors provide the total number of samples collected. However, it would be useful to know the minimum number of samples used to build a single network, and whether the number of samples used to build networks varied between the different communities, as the number of samples may affect network inference. The total number of samples collected (1026) divided by the number of communities (84 based on 48 rewetting and 36 drought) is ca. 12, which is a relatively low number of samples to build correlation networks (as indicated by Berry et al 2014, 10.3389/fmicb.2014.00219, which suggests > 25 samples per network, although I accept that papers have been published with fewer samples).

Other comments:

Line 55 (abstract): this strengthening was not always "dramatic".

Line 139: Co-occurrence network focuses on significant associations, not interactions.

Line 128: "not interaction between bacteria and fungi" (add s in interaction).

Line 185: change "form" to "from"

Lines 331-332: "Both network of AMF and other fungi and network of AMF and bacteria, when re-wetted, largely recovered". This does not seem to be the case in the rhizosphere. In (A), the rewetting panel there are fewer interactions in rhizosphere under rewetting than control, and for panel B, if there are differences they are hard to assess visually.

Lines 389-390: also could be a slower response not captured by the study.

Likewise for 405-406: could this be a temporal effect? In other words, could sampling over a longer period post rewetting show a different pattern?

Line 494: delete extra space before the full stop.

Reviewer #2 (Remarks to the Author):

All of my concerns were addressed and the revised manuscript is now exceptionally well written and clear. Further, the work represents a very important, direct, and comprehensive contribution to the field of resistance/resilience ecology as it relates to microbial communities within agricultural systems. The authors presented very detailed and attentive responses to the concerns of the reviewers and issues related to the statistical implications of the approach have also been addressed. I thoroughly enjoyed reading this revised version of the manuscript and my recommendation is for publication without further revisions.

Reviewer #3 (Remarks to the Author):

This manuscript has improved in clarity and the figures are much easier to understand. The authors have addressed most of my and the other reviewers' comments, and have done a number of additional analyses while they removed some others. However, while presenting interesting patterns, I still feel that the manuscript lacks conceptual framing and hypothesis development. Yes, it tests hypotheses that have previously been tested, but what are the new insights here? I think this lack of conceptual framing and insight is caused because the authors never, in detail, explore what these networks actually mean. Again, as I stated in my comments on the previous version, what would be interesting here is to develop hypotheses on how networks in soil, roots, and leaves would differ in their response to drought. As it stands, the manuscript reads very repetitive and does not offer a clear step forward in our understanding of network responses to drought.

However, in response to one of my other comments, it appeared that the networks in this study not only include datapoints from the 6 true field replicates, but also lump together the various time points during the progressing drought (6 time points over 6 weeks) and during the recovery period (8 timepoints over 8 weeks). This approach is not mentioned explicitly and not justified, and it seems rather inappropriate to me. It is clear that during those periods, microbial communities go through large changes (as can be seen in Fig. 1, although no information is presented on shifts in community composition here) and not only am I wondering what networks of these combined time points actually represent, as far as I am aware, no other studies constructing networks have lumped time points, which means that they can't be compared to these. This also brings me back to my most important issue, which is that it is hardly explored what these networks/ interactions actually mean ecologically.

Reviewer #4 (Remarks to the Author):

The authors have addressed all concerns and the manuscript has significantly improved. This is a great paper that will certainly catch attention in the plant-microbe community and will be cited.



## 1 **Response to reviews of our revised manuscript.**

2  
3 Four reviewers responded to our revised manuscript, and all four complemented our first  
4 revision. Two reviewers (#s 1 and 3) asked for additional revisions while the other two (#s 2 and  
5 4) did not.

### 6 7 **FULL REVIEWER COMMENTS**

#### 8 9 **Reviewer #1 (Remarks to the Author):**

10  
11 The authors have carried out a considerable revision of their manuscript, and in general, have  
12 addressed most of my concerns. I have some remaining concerns, which I detail below.

13  
14 I find interpreting Figure 1 and S1 difficult. I particularly struggled with the shaded vs unshaded  
15 data. Could the authors help the reader somehow, perhaps by indicating in the text discussing  
16 the figure whether they are referring to the shaded or unshaded parts of the graph?

17  
18 **Response:** We appreciate this comment and have revised the figure and figure legend to clarify  
19 matters.

20  
21 **Lines 791 and 795 in change-tracked manuscript: Revised legend of Figure 1 and also of**  
22 **Figure S1:** Ecological resistance to drought stress is ... at each of the droughted weeks (weeks 3  
23 – 8, the grey shaded area). Ecological resilience to rewetting is ... after rewetting were weeks 9  
24 – 17 (the gold shaded area).

25  
26 Regarding the general concern 3 about correcting p-values with FDR. This seems an appropriate  
27 response, however, without statistics regarding how many nodes or edges were removed it is  
28 hard to assess the impact of FDR in their networks.

29  
30 **Response:** We assessed the impact of applying a FDR to network structure and provided the  
31 results in the supplementary Table S3. Out of the 64 networks examined, 16 were affected by  
32 FDR correction, and the proportion of edge removal ranged from 19.49% to 94.76% and the  
33 proportion of vertices removal ranged from 10.84% to 90.40%. Information added in line 573 of  
34 change-tracked manuscript

**Table S3** The number and proportion of network edge and vertices removed due to FDR correction

| Network        | Compartment | Treatment | Period    | No.edges<br>FDR | No.edges<br>nFDR | Edges<br>Removed | No.vertices<br>FDR | No.vertices<br>nFDR | Vertices<br>Removed |
|----------------|-------------|-----------|-----------|-----------------|------------------|------------------|--------------------|---------------------|---------------------|
| Inter-Bac-Fung | Root        | Stress    | Drought   | 10              | 191              | 94.76%           | 17                 | 177                 | 90.40%              |
| Cross-Bac-Fung | Root        | Stress    | Drought   | 95              | 1130             | 91.59%           | 102                | 540                 | 81.11%              |
| Bac-Bac        | Root        | Stress    | Drought   | 77              | 888              | 91.33%           | 79                 | 448                 | 82.37%              |
| Fung-Fung      | Root        | Stress    | Drought   | 8               | 51               | 84.31%           | 13                 | 49                  | 73.47%              |
| Bac-Bac        | Soil        | Stress    | Drought   | 193             | 848              | 77.24%           | 187                | 611                 | 69.39%              |
| Inter-Bac-Fung | Soil        | Stress    | Drought   | 52              | 225              | 76.89%           | 73                 | 257                 | 71.60%              |
| Cross-Bac-Fung | Soil        | Stress    | Drought   | 272             | 1164             | 76.63%           | 263                | 814                 | 67.69%              |
| Fung-Fung      | Soil        | Stress    | Drought   | 27              | 91               | 70.33%           | 34                 | 86                  | 60.47%              |
| Inter-Bac-Fung | Soil        | Control   | Drought   | 274             | 408              | 32.84%           | 226                | 309                 | 26.86%              |
| Inter-Bac-Fung | Rhizosphere | Stress    | Drought   | 161             | 228              | 29.39%           | 143                | 185                 | 22.70%              |
| Cross-Bac-Fung | Rhizosphere | Stress    | Drought   | 811             | 1085             | 25.25%           | 439                | 536                 | 18.10%              |
| Bac-Bac        | Rhizosphere | Stress    | Drought   | 481             | 643              | 25.19%           | 324                | 395                 | 17.97%              |
| Cross-Bac-Fung | Soil        | Control   | Drought   | 1859            | 2482             | 25.10%           | 788                | 972                 | 18.93%              |
| Bac-Bac        | Soil        | Control   | Drought   | 1490            | 1956             | 23.82%           | 636                | 784                 | 18.88%              |
| Fung-Fung      | Rhizosphere | Stress    | Drought   | 169             | 214              | 21.03%           | 83                 | 95                  | 12.63%              |
| Fung-Fung      | Soil        | Control   | Drought   | 95              | 118              | 19.49%           | 74                 | 83                  | 10.84%              |
| Bac-Bac        | Leaf        | Control   | Drought   | 43              | 43               | 0                | 47                 | 47                  | 0                   |
| Bac-Bac        | Leaf        | Control   | Rewetting | 433             | 433              | 0                | 79                 | 79                  | 0                   |
| Bac-Bac        | Leaf        | Stress    | Drought   | 141             | 141              | 0                | 93                 | 93                  | 0                   |
| Bac-Bac        | Leaf        | Stress    | Rewetting | 1015            | 1015             | 0                | 138                | 138                 | 0                   |
| Bac-Bac        | Rhizosphere | Control   | Drought   | 10234           | 10234            | 0                | 887                | 887                 | 0                   |
| Bac-Bac        | Rhizosphere | Control   | Rewetting | 5050            | 5050             | 0                | 686                | 686                 | 0                   |
| Bac-Bac        | Rhizosphere | Stress    | Rewetting | 13730           | 13730            | 0                | 761                | 761                 | 0                   |
| Bac-Bac        | Root        | Control   | Drought   | 10518           | 10518            | 0                | 608                | 608                 | 0                   |

|                |             |         |           |       |       |   |      |      |   |
|----------------|-------------|---------|-----------|-------|-------|---|------|------|---|
| Bac-Bac        | Root        | Control | Rewetting | 2755  | 2755  | 0 | 348  | 348  | 0 |
| Bac-Bac        | Root        | Stress  | Rewetting | 9030  | 9030  | 0 | 495  | 495  | 0 |
| Bac-Bac        | Soil        | Control | Rewetting | 1151  | 1151  | 0 | 590  | 590  | 0 |
| Bac-Bac        | Soil        | Stress  | Rewetting | 1879  | 1879  | 0 | 632  | 632  | 0 |
| Cross-Bac-Fung | Leaf        | Control | Drought   | 122   | 122   | 0 | 73   | 73   | 0 |
| Cross-Bac-Fung | Leaf        | Control | Rewetting | 554   | 554   | 0 | 117  | 117  | 0 |
| Cross-Bac-Fung | Leaf        | Stress  | Drought   | 189   | 189   | 0 | 117  | 117  | 0 |
| Cross-Bac-Fung | Leaf        | Stress  | Rewetting | 1436  | 1436  | 0 | 186  | 186  | 0 |
| Cross-Bac-Fung | Rhizosphere | Control | Drought   | 11116 | 11116 | 0 | 1036 | 1036 | 0 |
| Cross-Bac-Fung | Rhizosphere | Control | Rewetting | 7371  | 7371  | 0 | 896  | 896  | 0 |
| Cross-Bac-Fung | Rhizosphere | Stress  | Rewetting | 16408 | 16408 | 0 | 894  | 894  | 0 |
| Cross-Bac-Fung | Root        | Control | Drought   | 12684 | 12684 | 0 | 714  | 714  | 0 |
| Cross-Bac-Fung | Root        | Control | Rewetting | 3478  | 3478  | 0 | 433  | 433  | 0 |
| Cross-Bac-Fung | Root        | Stress  | Rewetting | 11000 | 11000 | 0 | 596  | 596  | 0 |
| Cross-Bac-Fung | Soil        | Control | Rewetting | 1505  | 1505  | 0 | 760  | 760  | 0 |
| Cross-Bac-Fung | Soil        | Stress  | Rewetting | 2127  | 2127  | 0 | 749  | 749  | 0 |
| Inter-Bac-Fung | Leaf        | Control | Drought   | 3     | 3     | 0 | 5    | 5    | 0 |
| Inter-Bac-Fung | Leaf        | Control | Rewetting | 82    | 82    | 0 | 46   | 46   | 0 |
| Inter-Bac-Fung | Leaf        | Stress  | Drought   | 2     | 2     | 0 | 4    | 4    | 0 |
| Inter-Bac-Fung | Leaf        | Stress  | Rewetting | 331   | 331   | 0 | 96   | 96   | 0 |
| Inter-Bac-Fung | Rhizosphere | Control | Drought   | 777   | 777   | 0 | 391  | 391  | 0 |
| Inter-Bac-Fung | Rhizosphere | Control | Rewetting | 1529  | 1529  | 0 | 437  | 437  | 0 |
| Inter-Bac-Fung | Rhizosphere | Stress  | Rewetting | 2398  | 2398  | 0 | 474  | 474  | 0 |
| Inter-Bac-Fung | Root        | Control | Drought   | 1840  | 1840  | 0 | 417  | 417  | 0 |
| Inter-Bac-Fung | Root        | Control | Rewetting | 619   | 619   | 0 | 246  | 246  | 0 |
| Inter-Bac-Fung | Root        | Stress  | Rewetting | 1836  | 1836  | 0 | 409  | 409  | 0 |
| Inter-Bac-Fung | Soil        | Control | Rewetting | 161   | 161   | 0 | 145  | 145  | 0 |
| Inter-Bac-Fung | Soil        | Stress  | Rewetting | 167   | 167   | 0 | 157  | 157  | 0 |

|           |             |         |           |     |     |   |     |     |   |
|-----------|-------------|---------|-----------|-----|-----|---|-----|-----|---|
| Fung-Fung | Leaf        | Control | Drought   | 76  | 76  | 0 | 24  | 24  | 0 |
| Fung-Fung | Leaf        | Control | Rewetting | 39  | 39  | 0 | 31  | 31  | 0 |
| Fung-Fung | Leaf        | Stress  | Drought   | 46  | 46  | 0 | 22  | 22  | 0 |
| Fung-Fung | Leaf        | Stress  | Rewetting | 90  | 90  | 0 | 42  | 42  | 0 |
| Fung-Fung | Rhizosphere | Control | Drought   | 105 | 105 | 0 | 77  | 77  | 0 |
| Fung-Fung | Rhizosphere | Control | Rewetting | 792 | 792 | 0 | 159 | 159 | 0 |
| Fung-Fung | Rhizosphere | Stress  | Rewetting | 280 | 280 | 0 | 94  | 94  | 0 |
| Fung-Fung | Root        | Control | Drought   | 326 | 326 | 0 | 91  | 91  | 0 |
| Fung-Fung | Root        | Control | Rewetting | 104 | 104 | 0 | 64  | 64  | 0 |
| Fung-Fung | Root        | Stress  | Rewetting | 134 | 134 | 0 | 69  | 69  | 0 |
| Fung-Fung | Soil        | Control | Rewetting | 193 | 193 | 0 | 131 | 131 | 0 |
| Fung-Fung | Soil        | Stress  | Rewetting | 81  | 81  | 0 | 75  | 75  | 0 |

36

37 Regarding general concern 4: I am happy with the author's response.

38 **Response:** Thank you!

39

40 Regarding general concern 5: I have some remaining concerns about calling associations/co-  
41 occurrences as interactions throughout the manuscript. The authors refer to F-F, F-B  
42 interactions etc throughout the manuscript, but this is not what they measured. The text in  
43 lines 415-425 is useful and needed, however, the authors themselves acknowledge that  
44 correlation does not equate to interaction. Ideally, they should use associations or co-  
45 occurrences instead.

46 **Response:** We agree with the reviewer and now use association instead of interaction  
47 throughout the revised manuscript. Revised in lines 47, 114, 115, 121, 130, 133, 134, 142, 153,  
48 180, 248-252, 276, 311, 363, 383, 386, 389, 424, 433, 434, 451-456, 467, 495, 579, 813, 833,  
49 834 in change-tracked manuscript.

50

51 Regarding general concern 6: I am happy with the author's response.

52 **Response:** Thank you!

53

54 Line 214: the authors wrote "we found that the resistance to drought stress for fungal  
55 mycobiomes was consistently stronger than that for bacterial microbiomes for weeks 5 in root,  
56 weeks 4 – 6 in rhizosphere, and weeks 4 and 6 – 8 in rhizosphere". Do the authors  
57 mean ..."weeks 4 and 6 – 8 in soil"?

58 **Response:** We are grateful that the reviewer caught our error. We corrected it in the revised  
59 manuscript in line 230 of change-tracked manuscript.

60

61 In some cases, the authors seem to overstate the differences between networks (to me  
62 anyway). The use of drastically/strongly enhanced co-occurrences in some cases seems  
63 inappropriate when "enhancing" alone would suffice. In the legend for figure S3: I would say  
64 that FF- co-occurrence is enhanced by drought but not necessarily drastically so. Following this,  
65 the recovery in F-F network following re-wetting seems subtle for soil (if at all) and for root. For  
66 Figure S14 legend, I find the use of "drastically" and "strongly" excessive. Likewise for enhanced  
67 in figure S15 when discussing rhizosphere F-F network.

68 **Response:** We agree with the reviewer and now, to avoid overstating our results, we have  
69 removed the words 'drastically', or 'strongly' in the legend of Figure S3, S14 and S15, and in  
70 lines 55, 267, 432 and 832 of the change-tracked manuscript.

71

72 In Fig 1 legend, the authors state "32 of 36 cases". What is each "case", I presume it is  
73 communities, and the authors should indicate that.

74 **Response:** We appreciate the reviewer finding this ambiguity and we have changed 'cases' into  
75 'communities' in the legend of Fig 1 in line 797 of change-tracked manuscript.

76

77 Line 466: It is helpful that the authors provide the total number of samples collected. However,  
78 it would be useful to know the minimum number of samples used to build a single network, and  
79 whether the number of samples used to build networks varied between the different

80 communities, as the number of samples may affect network inference. The total number of  
81 samples collected (1026) divided by the number of communities (84 based on 48 rewetting and  
82 36 drought) is ca. 12, which is a relatively low number of samples to build correlation networks  
83 (as indicated by Berry et al 2014, 10.3389/fmicb.2014.00219, which suggests > 25 samples per  
84 network, although I accept that papers have been published with fewer samples).

85 **Response:** We agree with the reviewer and we, too, were concerned about the relatively low  
86 number of plots (six plots for each of the three treatments) in our study. Therefore, we  
87 analyzed networks for each period and treatment separately. Thus, the drought period network  
88 was based on 36 communities (6 plots \* 6 time points) and the rewetting period network was  
89 based on 48 communities (6 plots \* 8 time points). We now provide this information in lines  
90 567-568 of change-tracked manuscript

91  
92 **Revised:** We analyzed networks for each period and treatment separately, following previous  
93 studies<sup>62-65</sup>, to assure > 25 communities per network<sup>66</sup>. Thus, the drought-period network was  
94 based on 36 communities (6 plots \* 6 time points) and the rewetting period network was based  
95 on 48 communities (6 plots \* 8 time points).

96  
97 Other comments:

98 Line 55 (abstract): this strengthening was not always “dramatic”.

99 **Response:** We agree with the reviewer and have removed ‘dramatically’ in line 55 of change-  
100 tracked manuscript.

101  
102 Line 139: Co-occurrence network focuses on significant associations, not interactions.

103 **Response:** We agree with the reviewer and have changed ‘interactions’ into ‘associations’ lines  
104 47, 114, 115, 121, 130, 133, 134, 142, 153, 180, 248-252, 276, 311, 363, 383, 386, 389, 424, 433,  
105 434, 451-456, 467, 495, 579, 813, 833, 834 in change-tracked manuscript.

106  
107 Line 128: “not interaction between bacteria and fungi” (add s in interaction).

108 **Response:** We appreciate the reviewer catching our error in English usage. Note the word  
109 interaction has been changed into association according to your above comment. We added an  
110 ‘s’ to association in line 130 of change-tracked manuscript .

111  
112 Line 185: change “form” to “from”

113 **Response:** We now see that our use of form was ambiguous. We have changed ‘growth form’  
114 to ‘form of growth’ in line 200 of change-tracked manuscript.

115  
116 Lines 331-332: “Both network of AMF and other fungi and network of AMF and bacteria, when  
117 re-wetted, largely recovered”. This does not seem to be the case in the rhizosphere. In (A), the  
118 rewetting panel there are fewer interactions in rhizosphere under rewetting than control, and  
119 for panel B, if there are differences they are hard to assess visually.

120 **Response:** We appreciate this comment from the reviewer and now more accurately describe  
121 the results in lines 354-358 of change-tracked manuscript.

122

123 **Revised:** Networks in roots and soil of both AMF and other fungi and AMF and bacteria, when  
124 re-wetted, largely recovered their pre-drought complexity. In rhizosphere, however, the  
125 network of AMF and other fungi and was less complex in rewetting than the control (Fig. 5A),  
126 and the network of AMF and bacteria, when re-wetted, largely recovered was not different  
127 from the control (Fig. 55B).

128

129 Lines 389-390: also could be a slower response not captured by the study.

130 **Response:** We agree with the reviewer and have added this explanation in lines 427-429 of  
131 change-tracked manuscript.

132 **Added text:** These results could also be explained by a slower response in rhizosphere or soil  
133 that was not captured over the period of our study.

134

135

136 Likewise for 405-406: could this be a temporal effect? In other words, could sampling over a  
137 longer period post rewetting show a different pattern?

138

139 **Response:** We agree with the reviewer and have added this information here in line 445-447 of  
140 change-tracked manuscript.

141 **Added:** Also, it's unclear whether a different pattern would be observed if the micro- and  
142 mycobiomes were investigated over longer periods.

143

144

145 Line 494: delete extra space before the full stop.

146 **Response:** We thank the reviewer for catching this typo and we have removed the extra space  
147 in line 542 of change-tracked manuscript.

148

## 149 **Reviewer #2 (Remarks to the Author):**

150

151 All of my concerns were addressed and the revised manuscript is now exceptionally well  
152 written and clear. Further, the works represents an very important, direct, and comprehensive  
153 contribution to the field of resistance/resilience ecology as it relates to microbial communities  
154 within agricultural systems. The authors presented very detailed and attentive responses to the  
155 concerns of the reviewers and issues related to the statistical implications of the approach have  
156 also been addressed. I thoroughly enjoyed reading this revised version of the manuscript and  
157 my recommendation is for publication without further revisions.

158 **Response:** we are happy to learn that the reviewer is satisfied with our efforts in revision.

159

160

## 161 **Reviewer #3 (Remarks to the Author):**

162

163 This manuscript has improved in clarity and the figures are much easier to understand. The  
164 authors have addressed most of my and the other reviewers' comments, and have done a  
165 number of additional analyses while they removed some others. However, while presenting



166 interesting patterns, I still feel that the manuscript lacks conceptual framing and hypothesis  
167 development. Yes, it tests hypotheses that have previously been tested, but what are the new  
168 insights here? I think this lack of conceptual framing and insight is caused because the authors  
169 never, in detail, explore what these networks actually mean. Again, as I stated in my comments  
170 on the previous version, what would be interesting here is to develop hypotheses on how  
171 networks in soil, roots, and leaves would differ in their response to drought. As is stands, the  
172 manuscript reads very repetitive and does not offer a clear step forward in our understanding  
173 of network responses to drought.

174

175 **Response:** We welcome the opportunity to add more text about the ecological interpretation  
176 of our results. Before presenting new text, we want to point out that we framed three  
177 hypotheses and tested them with one traditional and two new approaches and enough data to  
178 fairly establish significance. Although we are averse to speculation, we did include some text  
179 that considered biological phenomena responsible for our results. Here are seven examples:

180

181 L166 Identification of key network elements, in this case modules or hubs, may facilitate  
182 practical application of microbial networks to modern agriculture. Modules, the highly inter-  
183 connected sub-structures within networks, may represent ecological units comprising highly  
184 interacting members (Newman 2006). Network hubs, microbes located in the central position  
185 of the network, and modular hubs, microbes located in the central position within a module, or  
186 connectors, which link different modules, are both disproportionately important in structuring  
187 microbial communities (Agler et al. 2016). Artificial inoculation of these hub taxa might provide  
188 a means of directing the microbial community, or key modules within the community, to  
189 reduce inputs or improve yields for modern agriculture (Toju et al. 2018).

190

191 L236. The rhizosphere zone around these newly formed roots may be quickly colonized by soil  
192 fungi, a community that was weakly affected by drought. This result suggests that re-assembly  
193 of the rhizosphere microbial community is more complex than previously expected.

194

195 L413. The increase in bacterial co-occurrences by drought might be related to a previous  
196 observation in this same sorghum system, that abundance of fungal yeasts, which receive  
197 nutrients by diffusion as do bacteria, increases shortly before flowering (Gao et al. 2020). Why  
198 F-F, and not B-B or B-F, would increase by drought in rhizosphere when all co-occurrences are  
199 declining in root and soil is more difficult to understand. Perhaps the reduction in nutrients  
200 experienced by root inhabiting fungi is not enough to discourage more oligotrophic rhizosphere  
201 fungi, or perhaps droughted roots release nutrients to the rhizosphere, either directly or as a  
202 consequence of senescence (Varoquaux et al. 2019).

203

204 L425. Apparently, restoration of water, which leads to restoration of plant photosynthesis  
205 (Varoquaux et al. 2019), brings back the disrupted microbial communities most reliably in leaf  
206 and root, where newly produced photosynthate would be most available, and less so in  
207 rhizosphere or soil.

208

209 L430. Sorting the microbes into fungal guilds or bacterial phyla allows us to speculate about  
210 ecological function. Both the rhizosphere fungal network and the leaf bacterial network  
211 strengthened in drought stress. For fungi, the increase in network association was coupled with  
212 an increase of fungal inter-guild co-occurrences. For bacteria, the increase in network  
213 association was accompanied by an increase in inter-phylum co-occurrences. (Fig. 3C). These  
214 results suggest that the strengthening of co-occurrences might be underpinned by niche  
215 differentiation and functional complementarity among taxa. Note the strengthening of fungal  
216 networks in rhizosphere was coupled with a drastic decrease of fungal richness (Gao et al.  
217 2020). Given that the microbial network should reflect function (Wagg et al. 2019, Ratzke et al.  
218 2020), the loss of rhizosphere fungal diversity must imply a loss of potential ecosystem  
219 functioning. The strengthened fungal network in the rhizosphere seen in this study was coupled  
220 with the co-occurrence of a number of fungal pathogens with saprotrophic, endophytic and  
221 mycorrhizal fungi. However, it is not likely that there was an increase in plant decay or disease,  
222 because we previously found that the relative abundance of rhizosphere fungal pathogens was  
223 drastically decreased by pre-flowering drought (Gao et al. 2020). Still, the question remains,  
224 why is network complexity rescued only for bacteria in leaf, and only for fungi in rhizosphere?  
225

226 L457. The detected associations in networks may composed of a mixture of real and false  
227 interactions, of direct and indirect interactions, and of physical and chemical interactions.  
228 However, we note that correlation does not necessarily equate with interaction, but also can be  
229 ascribed to habitat-filtering, niche sharing or dispersal limitation (Goberna et al. 2019). As is the  
230 case with most field-based experimental designs, it is not possible to assess the effect of habitat  
231 filtering and niche sharing. However, we can note that the role of dispersal limitation on the co-  
232 occurrence network is weak. Based on our implementation of a taxon-taxon-space association  
233 approach, the percentage of network links related to spatial distance was no more than three  
234 percent (0 – 2.94 %; Figure S13). This result echoes the absence of a significant relationship  
235 between spatial distance and dissimilarity of microbial community composition reported in our  
236 previous study (Gao et al. 2020). Thus, dispersal limitation is not likely the driver of microbial  
237 association and community composition in our small research site (~500 m<sup>2</sup>), which has been  
238 cultivated for nearly six decades and was planted to one crop (sorghum) throughout our study  
239 (Gao et al. 2020).  
240

241 L474. In terms of translating basic research to agricultural practice, the strengthening in  
242 drought of fungal networks in the rhizosphere and bacterial networks in leaves are prime  
243 targets for microbiome engineering (Fig. 3B, S3, S4). Given that microbial networks show  
244 association with function (Wagg et al. 2019, Ratzke et al. 2020), the drought-strengthened  
245 networks may help the host plant adapt to drought. This association suggests that inoculation  
246 of the hub taxa might rescue the drought-disrupted networks and improve drought tolerance.  
247 For example, in systems where the F-F network is disrupted by drought stress, the rhizosphere  
248 F-F network might be rescued by artificial inoculation of the arbuscular mycorrhizal  
249 OTU70\_Claroideoglomus and saprotrophic OTU93\_Mortierella and OTU59\_Chaetomium, the  
250 three hubs of F-F network that we detected under drought stress (Table S2). Similarly, for  
251 systems where the B-B network is disrupted by drought stress, the leaf B-B network might be  
252 rescued by artificial inoculation of drought tolerant, Monoderms (Actionobacteria and

253 Chloroflexi), members of the bacterial hubs detected under drought stress in this study (Table  
254 S2).

255  
256 **Here are added sections that provide insights (speculation?) about our results and the**  
257 **underlying biology.**

258  
259 Added Introduction in lines 157-165 of change-tracked manuscript: Should we expect that the  
260 microbiomes and mycobiomes that inhabit the different plant compartments (leaf, root,  
261 rhizosphere, and soil) will respond similarly to drought? Existing literature does not answer this  
262 question because previous investigations of co-occurrence networks are largely limited in one  
263 compartment (Table S1). By considering all four compartments in previous reports, we showed  
264 that drought responses of fungal and bacterial communities are most pronounced in root,  
265 followed by rhizosphere and, lastly, soil and leaves, where the responses were much weaker  
266 <sup>10,11</sup> (Fig. 1). Guided by these results, here we extend the network hypothesis to all four plant  
267 compartments: drought disrupts microbial network more strongly in root than rhizosphere, soil  
268 and leaf compartments.

269  
270 Added Discussion in lines 395-397 and 404-406 of change-tracked manuscript: At the dimension  
271 of plant compartments, drought disrupted root networks more strongly than those of other  
272 compartments... This result may reflect stronger reduction of plant resources in the root, which  
273 would lead to stronger disruptions of bacterial and fungal networks in this compartment.

274  
275 We also added discussion on the step forward in our understanding of network responses to  
276 drought in lines 407-411 of change-tracked manuscript: Previous studies also report disruption  
277 by drought of soil bacterial co-occurrence networks along natural arid gradients <sup>41,42</sup>, but  
278 another study did not report any effect of drought on soil fungal co-occurrence networks in  
279 potted plants <sup>19</sup>. Our study of field-grown plants shows that drought can enhance as well as  
280 disrupt microbiome networks, emphasizing the positive role that bacterial and fungal  
281 communities can play in plant drought response.

282  
283 We also added discussion on the ecological meaning of networks in lines 457-459 of change-  
284 tracked manuscript: The detected associations in networks may composed of a mixture of real  
285 and false interactions, of direct and indirect interactions, and of physical and chemical  
286 interactions.....While the exact nature of correlative associations cannot be recognized by our  
287 amplicon-based method, the changes in network complexity and detections of network hubs  
288 can be used to infer ecological function.

289  
290 However, in response to one of my other comments, it appeared that the networks in this study  
291 not only include datapoints from the 6 true field replicates, but also lump together the various  
292 time points during the progressing drought (6 time points over 6 weeks) and during the  
293 recovery period (8 timepoints over 8 weeks). This approach is not mentioned explicitly and not  
294 justified, and it seems rather inappropriate to me. It is clear that during those periods, microbial  
295 communities go through large changes (as can be seen in Fig. 1, although no information is  
296 presented on shifts in community composition here) and not only am I wondering what

297 networks of these combined time points actually represent, as far as I am aware, no other  
298 studies constructing networks have lumped time points, which means that they can't be  
299 compared to these.

300

301 **Response about explicit text on analysis of more than one time point:** We appreciate the  
302 reviewer's concern and have added text show how the analyses were conducted, as shown  
303 above and restated below.

304

305 **Revised** in lines 567-568 of change-tracked manuscript: We analyzed networks for each period  
306 and treatment separately, following previous studies<sup>62-65</sup>, to assure > 25 communities per  
307 network<sup>66</sup>. Thus, the drought-period network was based on 36 communities (6 plots \* 6 time  
308 points) and the rewetting period network was based on 48 communities (6 plots \* 8 time  
309 points).

310

311 **Response about the practice of analyzing sequential time points:** To alleviate the reviewer's  
312 concern ("... as far as I am aware, no other studies constructing networks have lumped time  
313 points."), our search on google scholar returned numerous studies that construct network using  
314 samples of different time points as shown by these examples (full references at the end of this  
315 document):

316

317 36 time points (Lejal et al. 2021)  
318 35 / 120 time points (Fuhrman et al. 2015)  
319 253 / 365 time points (Faust et al. 2018)  
320 72 time points (Gilbert et al. 2012)  
321 15 time points (Pinto et al. 2014)  
322 3 time points (Dunphy et al. 2019)  
323 5 time points (Shade et al. 2013)  
324 4 time points (Liu and Howell 2021)  
325 3 time points (Jiao et al. 2017)  
326 5 time points (Carini et al. 2020)

327

328 This also bring me back to my most important issue, which is that it is hardly explored what  
329 these networks/ interactions actually mean ecologically.

330

331 **Response given just above.**

332

333

334 **Reviewer #4 (Remarks to the Author):**

335

336 The authors have addressed all concerns and the manuscript has significantly improved. This is  
337 a great paper that will certainly catch attention in the plant-microbe community and will be  
338 cited.

339

340 **Response:** we are happy to learn that the reviewer is satisfied with our efforts in revision.

341  
342  
343  
344  
345  
346  
347  
348  
349  
350  
351  
352  
353  
354  
355  
356  
357  
358  
359  
360  
361  
362  
363  
364  
365  
366  
367  
368  
369  
370  
371  
372  
373

## References

- Carini, P., M. Delgado-Baquerizo, E.-L. S. Hinckley, H. Holland-Moritz, T. E. Brewer, G. Rue, C. Vanderburgh, D. McKnight, N. Fierer, and J. K. Jansson. 2020. Effects of Spatial Variability and Relic DNA Removal on the Detection of Temporal Dynamics in Soil Microbial Communities. *mBio* **11**:e02776-02719.
- Dunphy, C. M., T. C. Gouhier, N. D. Chu, and S. V. Vollmer. 2019. Structure and stability of the coral microbiome in space and time. *Scientific Reports* **9**:6785.
- Faust, K., F. Bauchinger, B. Laroche, S. de Buyl, L. Lahti, A. D. Washburne, D. Gonze, and S. Widder. 2018. Signatures of ecological processes in microbial community time series. *Microbiome* **6**:120.
- Fuhrman, J. A., J. A. Cram, and D. M. Needham. 2015. Marine microbial community dynamics and their ecological interpretation. *Nature Reviews Microbiology* **13**:133-146.
- Gilbert, J. A., J. A. Steele, J. G. Caporaso, L. Steinbrück, J. Reeder, B. Temperton, S. Huse, A. C. McHardy, R. Knight, I. Joint, P. Somerfield, J. A. Fuhrman, and D. Field. 2012. Defining seasonal marine microbial community dynamics. *The ISME Journal* **6**:298-308.
- Jiao, S., Z. Zhang, F. Yang, Y. Lin, W. Chen, and G. Wei. 2017. Temporal dynamics of microbial communities in microcosms in response to pollutants. *Molecular Ecology* **26**:923-936.
- Lejal, E., J. Chiquet, J. Aubert, S. Robin, A. Estrada-Peña, O. Rue, C. Midoux, M. Mariadassou, X. Bailly, A. Cougoul, P. Gasqui, J. F. Cosson, K. Chalvet-Monfray, M. Vayssier-Taussat, and T. Pollet. 2021. Temporal patterns in *Ixodes ricinus* microbial communities: an insight into tick-borne microbe interactions. *Microbiome* **9**:153.
- Liu, D., and K. Howell. 2021. Community succession of the grapevine fungal microbiome in the annual growth cycle. *Environmental Microbiology* **23**:1842-1857.
- Pinto, A. J., J. Schroeder, M. Lunn, W. Sloan, L. Raskin, and M. A. Moran. 2014. Spatial-Temporal Survey and Occupancy-Abundance Modeling To Predict Bacterial Community Dynamics in the Drinking Water Microbiome. *mBio* **5**:e01135-01114.
- Shade, A., P. S. McManus, and J. Handelsman. 2013. Unexpected diversity during community succession in the apple flower microbiome. *mBio* **4**:e00602-00612.

### ***Reviewer comments, third round –***

Reviewer #1 (Remarks to the Author):

I am happy with the changes to the manuscript. The methodological questions I raised were clarified, and some of the language and writing changed to reflect my comments. I enjoyed reading the manuscript and appreciate that the authors were able to accommodate my concerns.

\*\*\*

I have read the response from the author. The response was basically to say that the LSA method (which was developed to deal with time series data but has some problems as the authors pointed out) is not appropriate for their data. Also, they mention that a previous study published in Nature (Dai et al) used the same method (Spearman rank correlation) for a dataset that was also collected along a time series. This is a valid response.

However, the authors did not specifically respond how their method may deal with specific issues that time series data cause for network analysis. In particular, time series data can lead to considerable issues with temporal autocorrelation (for more details: <https://www.frontiersin.org/articles/10.3389/fgene.2020.00310/full>). More likely, their data includes some temporal autocorrelation, but spurious correlations are a limitation of network analysis which does not necessarily compromise the work if the author took the steps to minimise the artefacts. The author's carried out false rate discovery correction of their data, which removes weaker/spurious correlations (although, strangely, in many of their networks FDR correction did not remove any correlations or nodes from their network).

The authors cited the work by Dai et al (2022) to demonstrate how their network methodology is valid. However, this study (Dai et al), while using spearman rank correlations, removed weaker correlations using the Random Matrix Theory approach, and they compared their networks to random networks generated from their data, which gives a measure of how robust their networks are.

In short, it is hard for me to assess how much temporal autocorrelation may have affected their networks, it may not be a problem, but the authors did not explain how they took temporal autocorrelation into account. They chose FDR to remove weaker correlations, which is a valid approach, but this correction did not affect many of their networks. Unless I am missing something, comparing the properties of their true networks with those of random networks generated from their data would give more confidence in the robustness of their networks.

## REVIEWER COMMENTS

Reviewer #1 (Remarks to the Author):

I am happy with the changes to the manuscript. The methodological questions I raised were clarified, and some of the language and writing changed to reflect my comments. I enjoyed reading the manuscript and appreciate that the authors were able to accommodate my concerns.

\*\*\*

I have read the response from the author. The response was basically to say that the LSA method (which was developed to deal with time series data but has some problems as the authors pointed out) is not appropriate for their data. Also, they mention that a previous study published in Nature (Dai et al) used the same method (Spearman rank correlation) for a dataset that was also collected along a time series. This is a valid response.

However, the authors did not specifically respond how their method may deal with specific issues that time series data cause for network analysis. In particular, time series data can lead to considerable issues with temporal autocorrelation (for more details: <https://www.frontiersin.org/articles/10.3389/fgene.2020.00310/full>). More likely, their data includes some temporal autocorrelation, but spurious correlations are a limitation of network analysis which does not necessarily compromise the work if the author took the steps to minimise the artefacts. The author's carried out false rate discovery correction of their data, which removes weaker/spurious correlations (although, strangely, in many of their networks FDR correction did not remove any correlations or nodes from their network).

The authors cited the work by Dai et al (2022) to demonstrate how their network methodology is valid. However, this study (Dai et al), while using spearman rank correlations, removed weaker correlations using the Random Matrix Theory approach, and they compared their networks to random networks generated from their data, which gives a measure of how robust their networks are.

In short, it is hard for me to assess how much temporal autocorrelation may have affected their networks, it may not be a problem, but the authors did not explain how they took temporal autocorrelation into account. They chose FDR to remove weaker correlations, which is a valid approach, but this correction did not affect many of their networks. Unless I am missing something, comparing the properties of their true networks with those of random networks generated from their data would give more confidence in the robustness of their networks.

**Response:** We have address the reviewer's concern about undetected autocorrelation using approaches suggested by the reviewer, one in Coenen et al 2020 (<https://www.frontiersin.org/articles/10.3389/fgene.2020.00310/full>) and another in Dai et al. (2022). As you can see, below, these additional analyses of our data do not reveal significant autocorrelation and do not affect our findings.

We will begin with the approach described in Figure 1 of Coenen et al 2020, who wrote: “In [Figure 1](#), we show how autocorrelation leads to high incidences of spurious correlations among independent time-series (with 100 random walks).”

To determine if our dataset suffered from similar temporal autocorrelation, we used the approach of Coenen et al 2020 to search for spurious associations for **6 random walks** (mimicking the drought period) and **8 random walks** (mimicking the rewetting period) of 6 time series (mimicking our six replicating samples). The results from 10 runs for each test show that our datasets are not influenced significantly by temporal autocorrelation. For the drought period, at most 0-1 of 15 correlations showed significant association (Fig. S14A-B) and for rewetting at most 1-3 of 15 correlations showed significant association (Fig. S14C-D).

We propose adding text to the manuscript and a supplemental figure S14 with the results from one run, as shown below.

**Added Text in lines 557-563:** Concern about temporal autocorrelation, leading to spurious correlations among independent time-series, led us to use the approach of Coenen, et al. <sup>67</sup> to simulate 6 random walks (mimicking the drought period) and 8 random walks (mimicking the rewetting period) of 6 time series (mimicking our six replicating samples). We were unable to detect significant temporal autocorrelation among the 15 comparisons of six, random time series for either the drought period ( $\leq 1$  significant association, Fig. S14A-B) or rewetting ( $\leq 1-3$  significant associations, Fig. S14C-D).



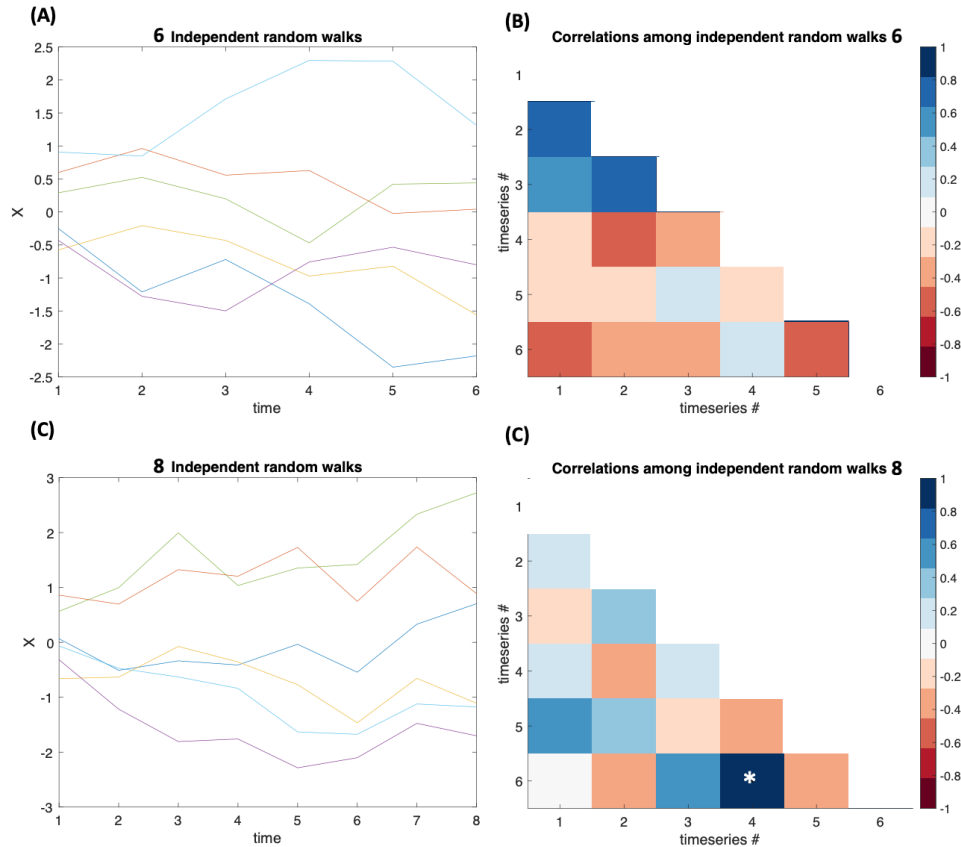

**Fig. S14** Minimal spurious association was detected in using the approach of Coenen et al 2020 from 6 and 8 independent random walks over 6 temporal series. The analysis was repeated 10 times and results from one run are shown here. (A) Six time-series of six independent random walks mimicking the drought period. (B) For the 15 correlations among six time series of six independent random walks, at most 0-1 significant spurious associations were detected (none were found in this example). (C) Six time-series of eight independent random walks mimicking the rewetting period. (D) For the 15 correlations among six time series of eight independent random walks, at most 1-3 significant spurious associations were detected (The one in this run is marked with an asterisk in the example).

From the Dai et al. (2022) publication suggested by the reviewer, we added new analyses of network construction using the Random Matrix Theory (RMT) approach and random network comparison as implemented in the Molecular Ecological Network Analyses Pipeline (MENAP).

First, as with Dai et al 2022, we used the MENAP to comparison the empirical network against random networks, finding that all networks are non-random (Table S4).

We propose adding text to our manuscript and a supplemental table S4, as shown below.

**Added text in lines 568-570:** In addition to FDR, we used Random Matrix Theory (RMT) to assess the robustness of correlations as implemented in the Molecular Ecological Network Analyses Pipeline (MENAP)<sup>70</sup>. We found that all empirical networks were non-random (Table S4).

**Table S4** Non-random topological features indicated by comparing empirical network against random networks

| Compartment | Treatment | Period    | Network Indexes                | Observation | Random network (mean $\pm$ sd)* | P value   |
|-------------|-----------|-----------|--------------------------------|-------------|---------------------------------|-----------|
| Root        | Control   | Drought   | Average clustering coefficient | 0.404       | 0.221 $\pm$ 0.012               | 1.48E-124 |
| Root        | Control   | Rewetting | Average clustering coefficient | 0.427       | 0.25 $\pm$ 0.013                | 1.08E-119 |
| Root        | Stress    | Drought   | Average clustering coefficient | 0.094       | 0.016 $\pm$ 0.005               | 1.57E-125 |
| Root        | Stress    | Rewetting | Average clustering coefficient | 0.461       | 0.278 $\pm$ 0.012               | 1.48E-124 |
| Root        | Control   | Drought   | Average path distance          | 2.916       | 2.666 $\pm$ 0.024               | 3.21E-108 |
| Root        | Control   | Rewetting | Average path distance          | 3.077       | 2.656 $\pm$ 0.027               | 1.64E-125 |
| Root        | Stress    | Drought   | Average path distance          | 6.065       | 4.533 $\pm$ 0.08                | 2.46E-134 |
| Root        | Stress    | Rewetting | Average path distance          | 3.111       | 2.554 $\pm$ 0.021               | 2.47E-148 |
| Root        | Control   | Drought   | Transitivity                   | 0.424       | 0.253 $\pm$ 0.006               | 2.02E-151 |
| Root        | Control   | Rewetting | Transitivity                   | 0.387       | 0.256 $\pm$ 0.007               | 2.40E-133 |
| Root        | Stress    | Drought   | Transitivity                   | 0.29        | 0.03 $\pm$ 0.006                | 1.94E-169 |
| Root        | Stress    | Rewetting | Transitivity                   | 0.445       | 0.296 $\pm$ 0.006               | 1.68E-145 |
| Rhizosphere | Control   | Drought   | Average clustering coefficient | 0.267       | 0.074 $\pm$ 0.01                | 1.14E-134 |
| Rhizosphere | Control   | Rewetting | Average clustering coefficient | 0.321       | 0.141 $\pm$ 0.011               | 1.39E-127 |
| Rhizosphere | Stress    | Drought   | Average clustering coefficient | 0.162       | 0.046 $\pm$ 0.007               | 4.00E-128 |
| Rhizosphere | Stress    | Rewetting | Average clustering coefficient | 0.45        | 0.3 $\pm$ 0.013                 | 1.34E-112 |
| Rhizosphere | Control   | Drought   | Average path distance          | 4.449       | 3.261 $\pm$ 0.05                | 1.33E-143 |
| Rhizosphere | Control   | Rewetting | Average path distance          | 3.804       | 2.99 $\pm$ 0.034                | 6.26E-144 |
| Rhizosphere | Stress    | Drought   | Average path distance          | 4.642       | 3.587 $\pm$ 0.042               | 5.40E-146 |
| Rhizosphere | Stress    | Rewetting | Average path distance          | 2.921       | 2.62 $\pm$ 0.022                | 6.69E-120 |
| Rhizosphere | Control   | Drought   | Transitivity                   | 0.283       | 0.098 $\pm$ 0.008               | 1.94E-142 |
| Rhizosphere | Control   | Rewetting | Transitivity                   | 0.354       | 0.175 $\pm$ 0.008               | 5.06E-141 |
| Rhizosphere | Stress    | Drought   | Transitivity                   | 0.373       | 0.089 $\pm$ 0.007               | 1.32E-166 |
| Rhizosphere | Stress    | Rewetting | Transitivity                   | 0.365       | 0.266 $\pm$ 0.006               | 6.14E-128 |
| Soil        | Control   | Drought   | Average clustering coefficient | 0.175       | 0.041 $\pm$ 0.009               | 1.58E-123 |

|      |         |           |                                |       |               |           |
|------|---------|-----------|--------------------------------|-------|---------------|-----------|
| Soil | Stress  | Drought   | Average clustering coefficient | 0.135 | 0.011 ± 0.004 | 4.89E-155 |
| Soil | Stress  | Rewetting | Average clustering coefficient | 0.166 | 0.017 ± 0.004 | 6.21E-163 |
| Soil | Control | Rewetting | Average clustering coefficient | 0.169 | 0.014 ± 0.004 | 1.25E-164 |
| Soil | Control | Drought   | Average path distance          | 4.586 | 3.664 ± 0.057 | 4.37E-127 |
| Soil | Stress  | Drought   | Average path distance          | 6.039 | 4.72 ± 0.099  | 9.21E-119 |
| Soil | Stress  | Rewetting | Average path distance          | 5.734 | 4.254 ± 0.054 | 9.66E-150 |
| Soil | Control | Rewetting | Average path distance          | 6.379 | 4.48 ± 0.049  | 1.23E-164 |
| Soil | Control | Drought   | Transitivity                   | 0.374 | 0.067 ± 0.008 | 3.26E-164 |
| Soil | Stress  | Drought   | Transitivity                   | 0.249 | 0.022 ± 0.006 | 1.33E-163 |
| Soil | Stress  | Rewetting | Transitivity                   | 0.266 | 0.028 ± 0.005 | 1.78E-173 |
| Soil | Control | Rewetting | Transitivity                   | 0.268 | 0.023 ± 0.004 | 2.56E-184 |
| Leaf | Control | Rewetting | Average clustering coefficient | 0.4   | 0.383 ± 0.018 | 1.18E-17  |
| Leaf | Stress  | Rewetting | Average clustering coefficient | 0.377 | 0.338 ± 0.018 | 1.69E-43  |
| Leaf | Control | Rewetting | Average path distance          | 4.093 | 2.492 ± 0.048 | 3.49E-158 |
| Leaf | Stress  | Rewetting | Average path distance          | 3.087 | 2.584 ± 0.034 | 2.97E-123 |
| Leaf | Control | Rewetting | Transitivity                   | 0.644 | 0.483 ± 0.012 | 4.62E-119 |
| Leaf | Stress  | Rewetting | Transitivity                   | 0.536 | 0.399 ± 0.01  | 5.87E-120 |

Random networks were generated at the Molecular Ecological Network Analyses Pipeline (MENAP) by randomly rewiring all the links while keeping the numbers of nodes and links of the empirical network.

Next, we compared the association of networks based on Spearman correlations as filtered by either the FDR or RMT approaches. As shown in the following figure of average degree, the results of these two different methods are consistent. The results of the two methods continue to support our first conclusion, that drought in general disrupts microbial networks. This result was found in 11 of 13 FDR networks, and 10 of 13 RMT networks. There was only one inconsistent case, concerning roots during drought, where the FF network showed disruption using the FDR approach but was unchanged using the RMT approach. We propose adding text to our manuscript a supplemental figure S15, as shown below.

**Added text in lines 571-573:** We then compared the association networks based on Spearman correlations as filtered by either the FDR or RMT approaches, finding that results of these two different methods are consistent in terms of drought response (Fig. S15-S16).

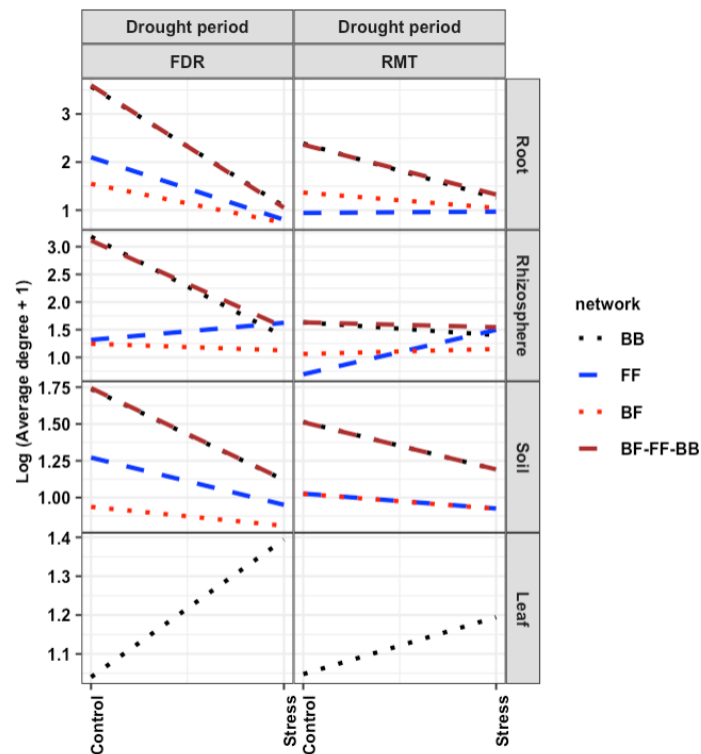

**Fig. S15** Consistent responses to drought of average degree of association networks based on Spearman correlations as filtered by either the false discovery rate (FDR) or random matrix theory (RMT) approach. Note that in only one case, roots, is there disagreement where the FF network showed disruption using the FDR approach but was unchanged using the RMT approach.

Finally, neither did application of the new, RMT analyses affect our second conclusion, that co-occurrence networks among functional guilds of rhizosphere fungi and leaf bacteria were dramatically strengthened by drought, because these same strengthening is found with both approaches. We propose adding a supplemental figure S16, as shown below.

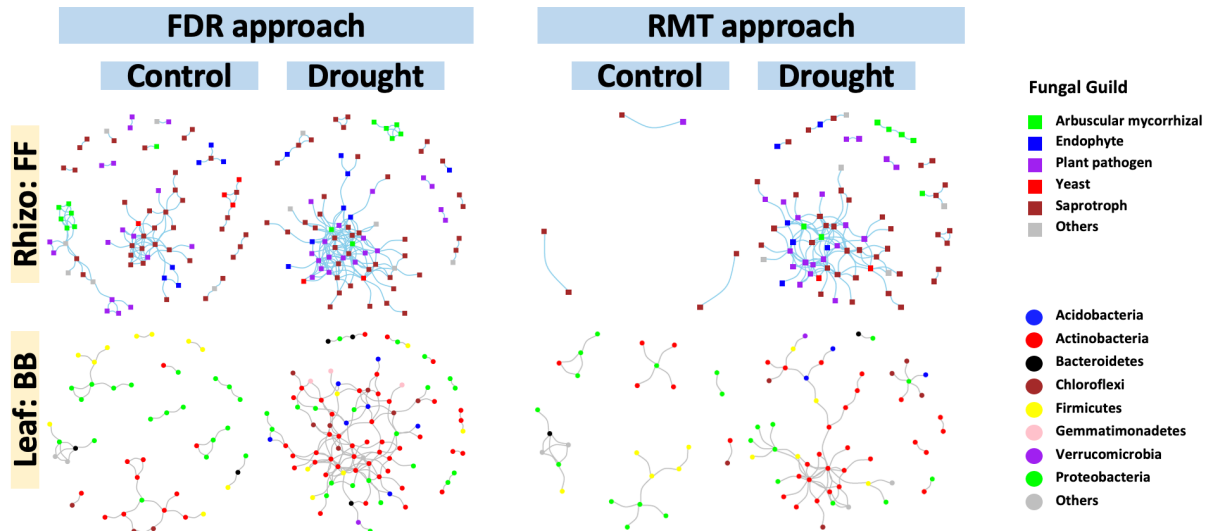

**Fig. S16** Spearman Rho co-occurrence networks of rhizosphere fungi and leaf bacteria were dramatically strengthened by drought, whether measured by FDR- or RMT-based approach.

To reiterate, both FDR and RMT approaches support the key findings that: (i) In general, drought disrupts microbial networks based on significant positive correlations among bacteria, among fungi and between bacteria and fungi. (ii) In contrast, co-occurrence networks among functional guilds of rhizosphere fungi and leaf bacteria were dramatically strengthened by drought.
